# Supplementary material for: Human iPSC-derived fallopian tube organoids with BRCA1 mutation recapitulate early-stage carcinogenesis
Source: PubMed Central journal article supplement (PMC9000920; doi:10.1016/j.celrep.2021.110146), 2021-12-28
Supplement: NIHMS1792247-supplement-Published_open_access_Supplemental_Materials.pdf [file NIHMS1792247-supplement-Published_open_access_Supplemental_Materials.pdf]

Cell Reports, Volume 37

**Supplemental information**

**Human iPSC-derived fallopian tube organoids  
with *BRCA1* mutation recapitulate  
early-stage carcinogenesis**

**Nur Yucer, Rodney Ahdoot, Michael J. Workman, Alexander H. Laperle, Maria S. Recouvreux, Kathleen Kurowski, Diana J. Naboulsi, Victoria Liang, Ying Qu, Jasmine T. Plummer, Simon A. Gayther, Sandra Orsulic, Beth Y. Karlan, and Clive N. Svendsen**

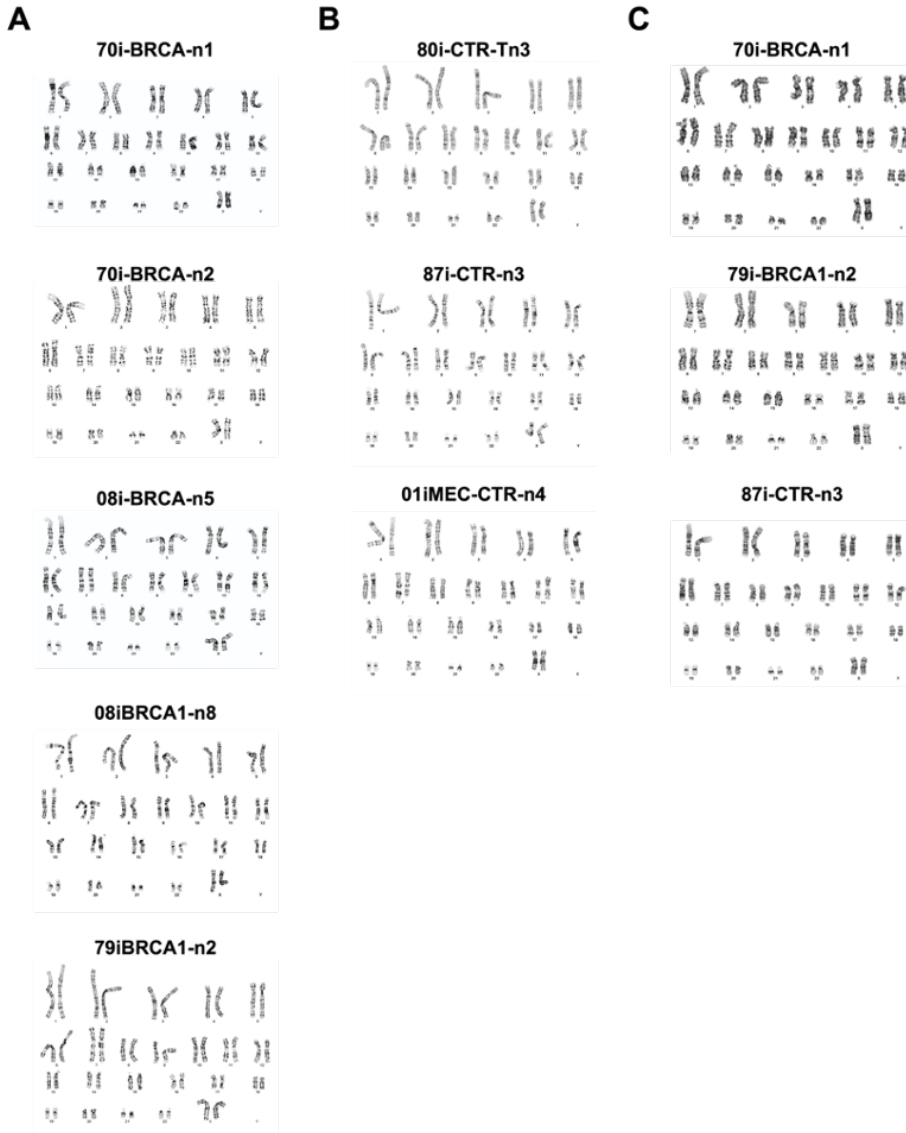

**Figure S1 (Related to Figure1). *BRCA1*<sup>mut</sup>-iPSC lines exhibit normal karyotypes, even after extensive culturing.** G-banded analysis of karyotype for (A) *BRCA1*<sup>mut</sup>-iPSC lines and (B) control iPSC lines at passage 9. (C) Karyotype analysis for 87i-CTR-n3 control and *BRCA1* mutant 70i-BRCA-n1 and 79i-BRCA-n2 at passage 32.

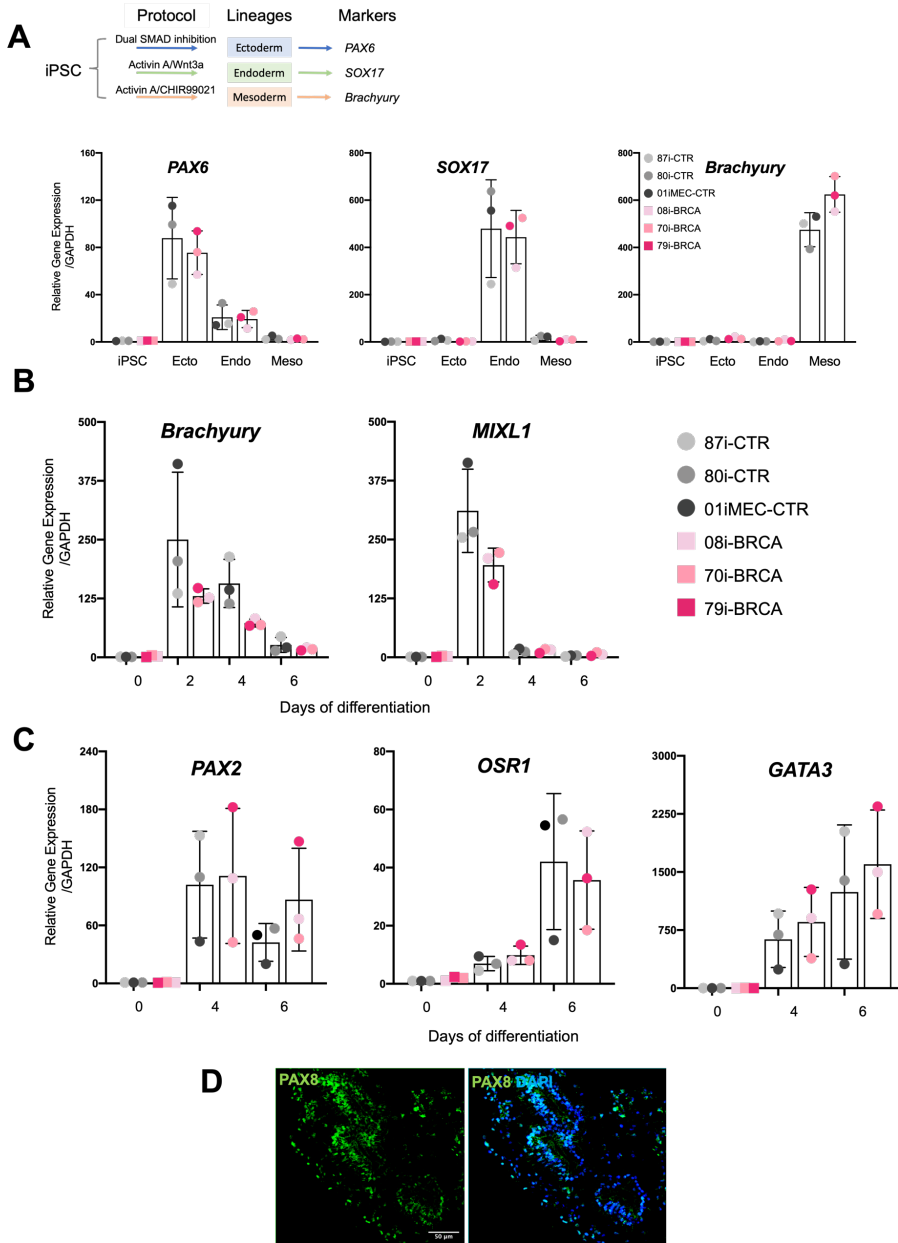

**Figure S2 (Related to Figure1). *BRCA1<sup>mut</sup>*-iPSC lines have the capacity to differentiate into three germ layers and (Related to Figure2) to differentiate of *BRCA1<sup>mut</sup>*-iPSC into Intermediate Mesoderm-Like Cells. (A) The factors and markers involved in the differentiation of three different germ layers (Chambers et al., 2009; Mae et al., 2013; Teo et al., 2014; Yucer et al., 2017). Expression of ectoderm marker *PAX6*, mesoderm marker *BRACHYURY*, and endoderm marker *SOX17* during course of differentiations. Relative gene expression to iPSC stage (day 0) was calculated using the  $\Delta\Delta Ct$  method and normalized to endogenous *GAPDH* level. Error bars are Standard Error of the Mean (SEM) ( $n = 3$  independent biological experiments and each dot represents the average of 3 independent**

biological experiments per line). (B) Expression kinetics of mesoderm markers *BRACHYURY* and *MIXL1* during the 6-day differentiation course using established protocol (Yucer et al., 2017). (C) Expression of intermediate mesoderm markers, *PAX2*, *OSR1*, and *GATA3* during the 6-day differentiation course. (D) Immunocytochemistry for FTE marker PAX8 in *BRCA1<sup>mut</sup>*-FTE organoid (70i-BRCA line) at day 30 in culture. Scale bars, 50  $\mu\text{m}$ . Relative gene expression at iPSC stage (day 0) was calculated using the  $\Delta\Delta\text{Ct}$  method and normalized to endogenous *GAPDH* level. Error bars are Standard Error of the Mean (SEM) ( $n = 3$  independent biological experiments and each dot represents the average of 3 independent biological experiments per line).

**A**

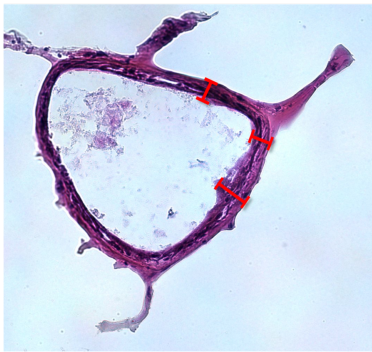

**B**

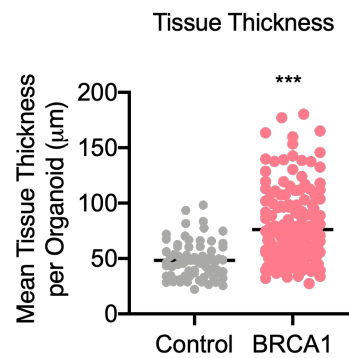

**C**

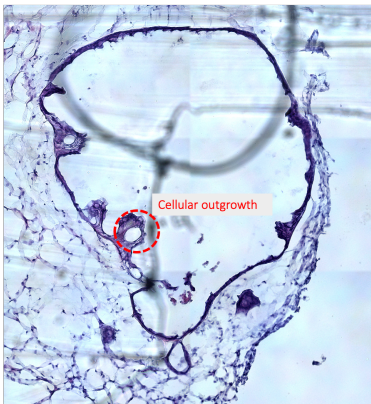

**D**

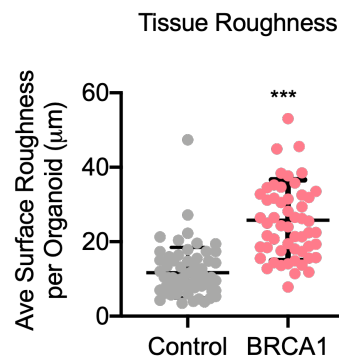

The arithmetic average roughness (cellular outgrowths),  $R_a$ ,

$$R_a = \frac{1}{n} \sum_{i=1}^n |y_i|$$

**Figure S3 (Related to Figure3). Histological characterization of controls and *BRCA1<sup>mut</sup>* FTE organoids. (A) H&E staining of normal FTE organoids at 4-months and quantification tissue thickness distribution. (B) FTE organoids thickness distribution by genotype. (C) H&E staining image, which was stitched using Stereo**

Investigator to indicate the cellular outgrowth (D) Cellular outgrowth measured as arithmetic average roughness by genotype.

$$R_a = \frac{1}{n} \sum_{i=1}^n |y_i|$$

Significance calculated using student t-test, \*\*\*p<0.00

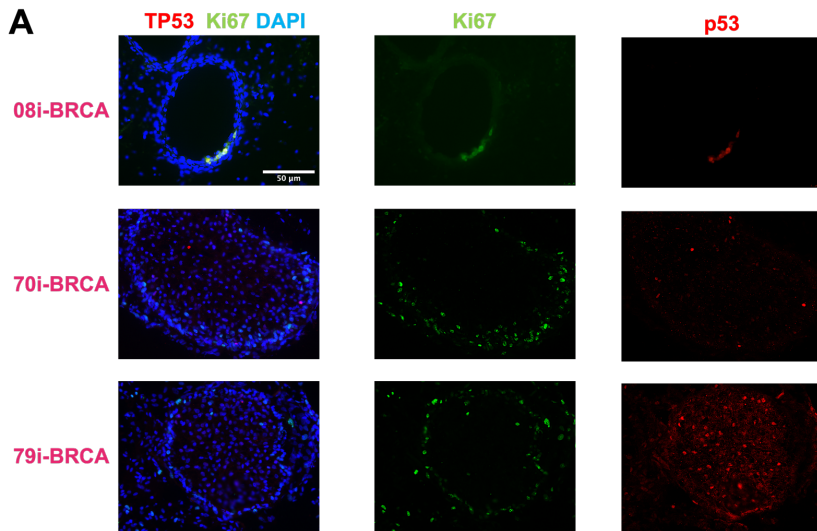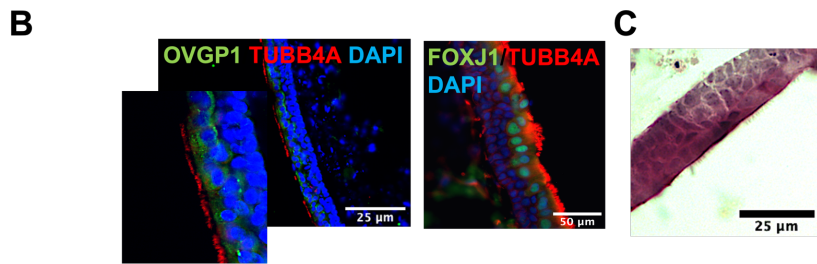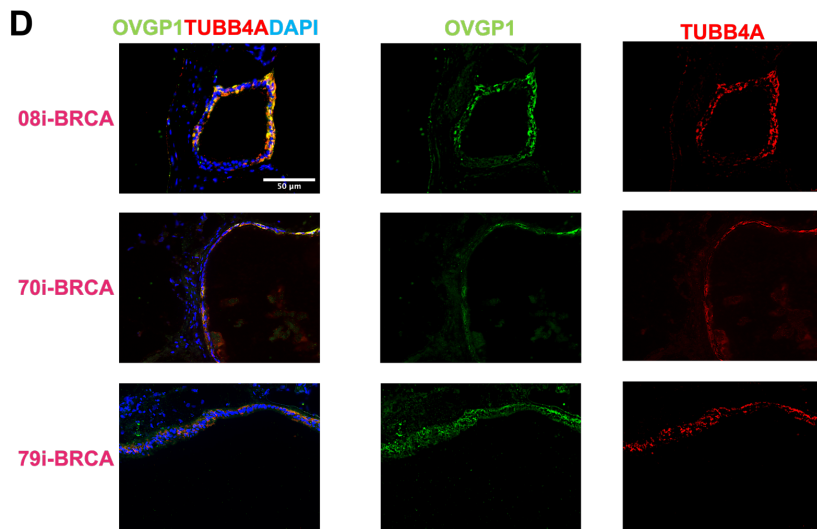

**Figure S4 (Related to Figure4). *BRCA1*<sup>mut</sup>-iPSC-derived fallopian tube organoids present cellular signature of**

**STIC pathology *in vitro*.** (A) Immunocytochemistry for TP53 and Ki67 for 3 different *BRCA1*<sup>mut</sup>-FTE-organoids.

Scale bars, 50  $\mu$ m. Cilia formation at 6-months shown by (B) immunocytochemistry for FTE secretory cell marker

OVGP1 and ciliated cell marker TUBB4A and FOXJ1 and (C) H&E staining in 80iCTR line organoids. Scale bars,

25  $\mu$ m and 50  $\mu$ m. (D) Immunocytochemistry for FTE secretory cell marker OVGP1 and ciliated cell marker

TUBB4A in for 3 different *BRCA1*<sup>mut</sup>-FTE organoids at 4 months. Scale bars, 50  $\mu$ m.

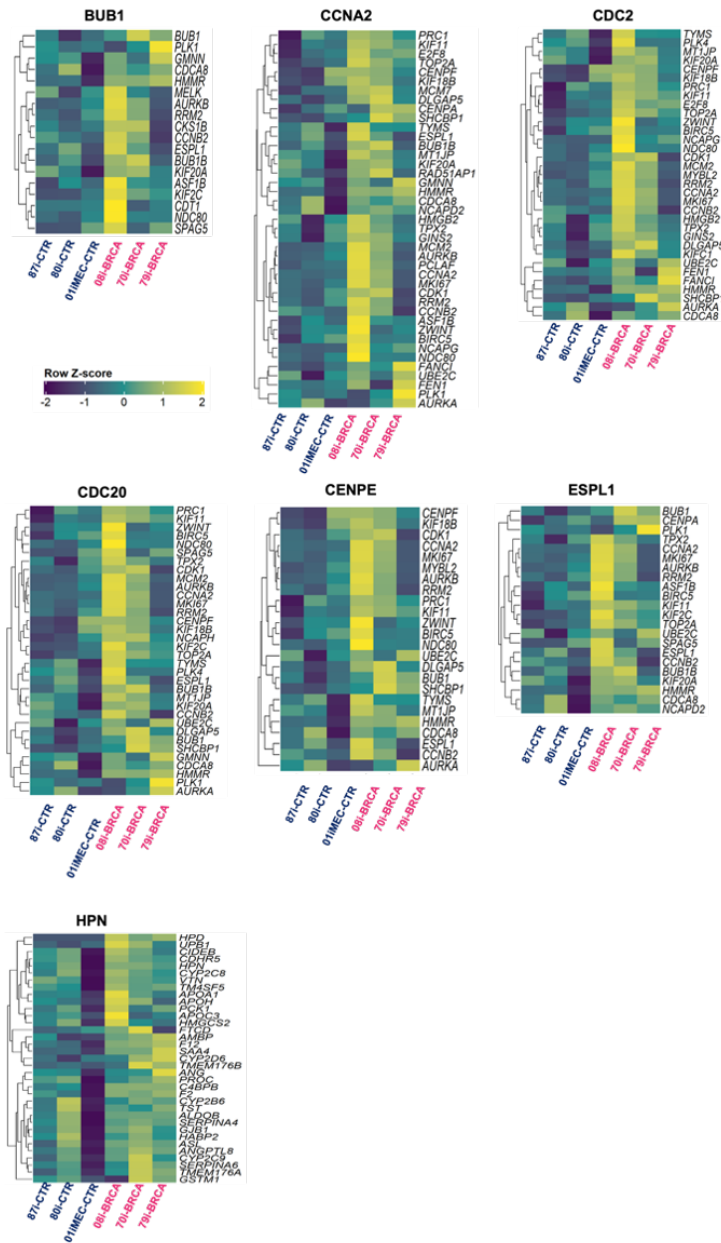

**Figure S5 (Related to Figure4). *BRCA1*<sup>mut</sup>-iPSC-derived fallopian tube organoids exhibit the molecular basis for STIC pathology *in vitro*.** Differential gene expression and GSEA for control and *BRCA1*<sup>mut</sup>-FTE organoids at 4-month in culture. FDR value is < 0.05. Z-scores of the leading-edge genes were calculated and used to construct a heatmap.

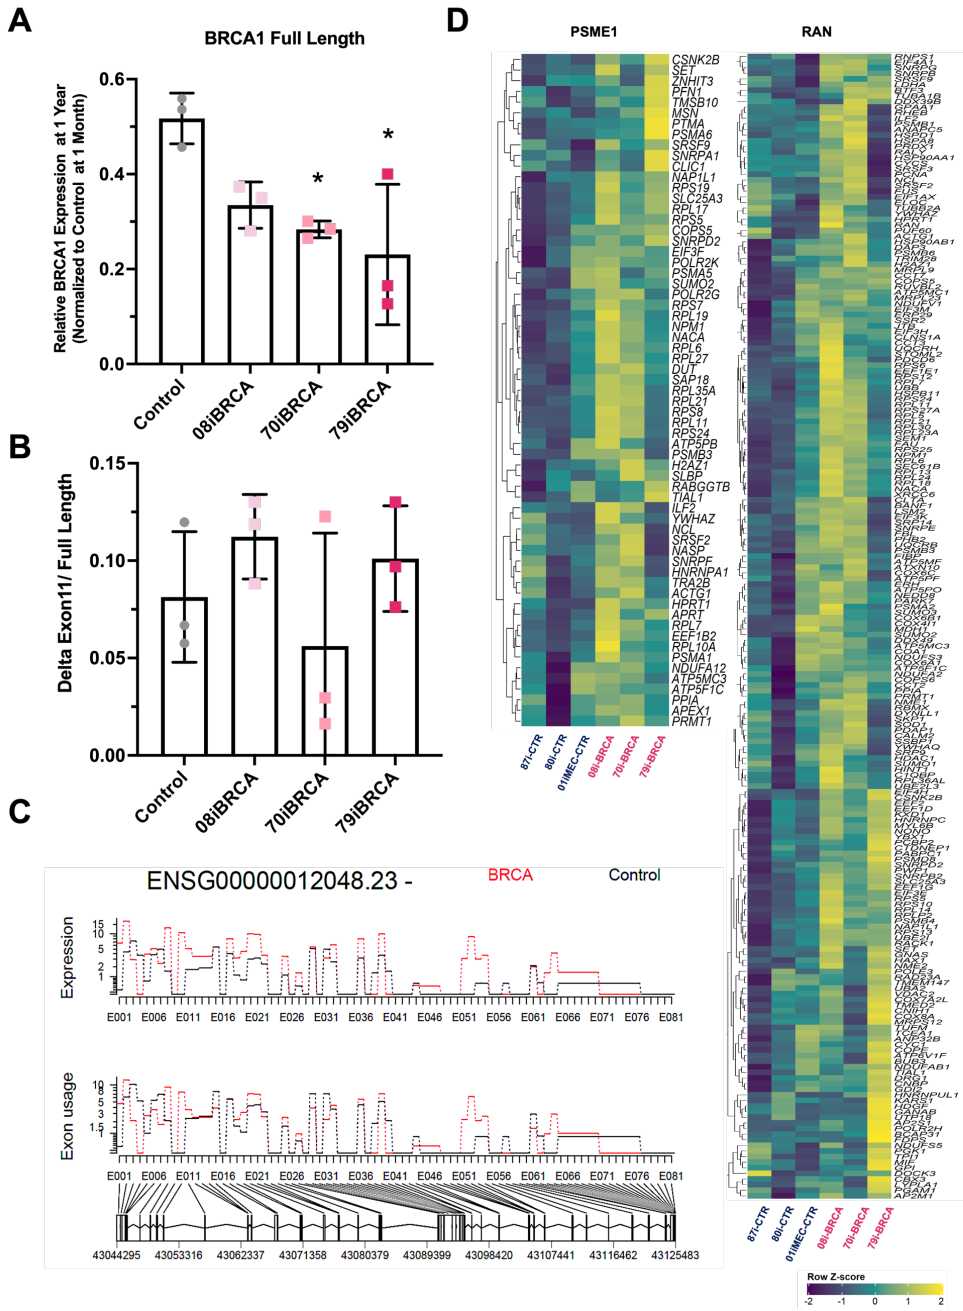

**Figure S6 (Related to Figure 5). The decrease in *BRCA1* expression in *BRCA1*<sup>mut</sup>-iPSC-derived fallopian tube organoid is not due to loss of heterozygosity (LOH).** (A) qRT-PCR quantification of full-length *BRCA1* gene expression at 1 month and 1 year. (B) qRT-PCR quantification of Delta exon 11 *BRCA1* gene expression. (C) Fragment mapping for the *BRCA1* gene on RNA sequencing data at 1-year culture. Relative gene expression to 87i-CTR was calculated using  $\Delta\Delta C_t$  method and normalized to endogenous *GAPDH* level. Error bars are Standard Error of the Mean (SEM) (n = 3 independent biological experiments and each dot represents the average of 3 independent biological experiments per line). Significance calculated using One-way ANOVA, Dunnett Multiple comparisons, \*p<0.05. (D) Differential gene expression and GSEA for control and *BRCA1*<sup>mut</sup>-FTE organoids at 1 year in culture. FDR value is < 0.05. Z-scores of the leading-edge genes were calculated and used to construct a heatmap.



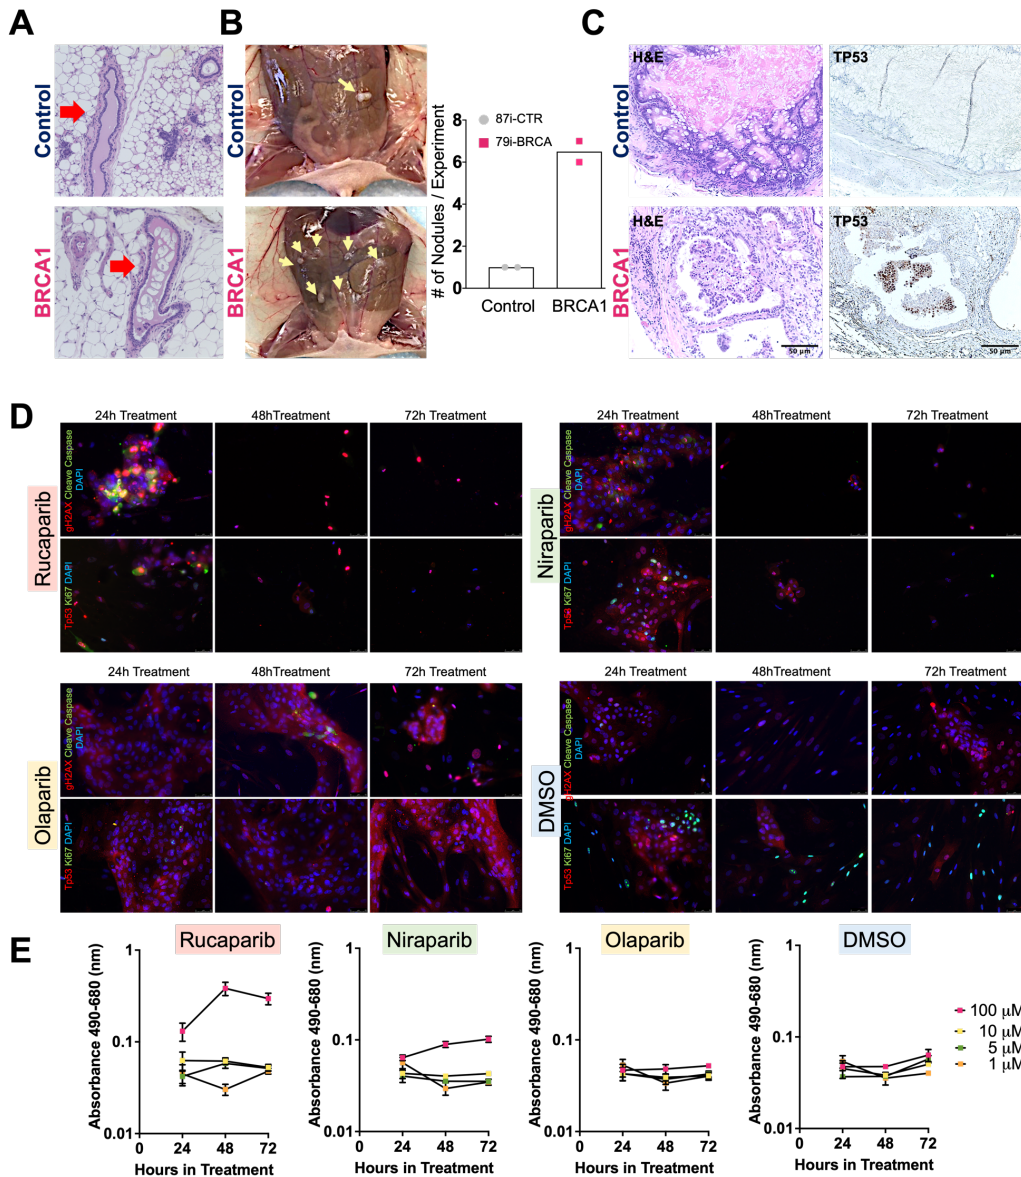

**Figure S7 (Related to Figure6). *BRCA1<sup>mut</sup>*-iPSC-derived fallopian tube organoids demonstrate cancerous characteristics *in vivo*.** (A) H&E images for normal control and *BRCA1<sup>mut</sup>*-FTE organoids within the mammary gland. (B) Brightfield images at 3 months post-transplantation of 87i-CTR FTE organoids and 79i-BRCA FTE organoids (after 4 months in culture), and total number of nodules per experiment. (C) H&E and TP53 immunohistochemistry images at 3 months post-transplantation. Scale bars, 50 μm. (D) Immunocytochemistry for TP53, Ki67, gH2AX and Cleaved Caspase3 in response to 100 mM DMSO, Rucaparib, Niraparib and Olaparib at 24, 48 and 72 hours treatment of primary cells from *BRCA1<sup>mut</sup>* tumor lesions. (E) Time course of cellular

cytotoxicity assay (LDH assay) in response to 100, 10, 5 and 1 mM DMSO, Rucaparib, Niraparib and Olaparib at 24, 48 and 72 hours treatment of primary cells from *BRCA1<sup>mut</sup>* tumor lesions.

**Table S1 (Related to Figure3). Gene enrichment sets for control vs *BRCA1<sup>mut</sup>*-FTE organoids at 4-month culture**

| NAME       | SIZE | ES         | NES       | NOM p-val   | FDR q-val   | FWER p-val | RANK AT MAX | LEADING EDGE                   |
|------------|------|------------|-----------|-------------|-------------|------------|-------------|--------------------------------|
| CAR_HPX    | 58   | 0.6686738  | 2.296964  | 0           | 0           | 0          | 1512        | tags=36%, list=8%, signal=39%  |
| GNF2_CCNA2 | 67   | 0.65380585 | 2.2726195 | 0           | 0           | 0          | 3785        | tags=61%, list=19%, signal=76% |
| GNF2_CCNB2 | 56   | 0.6678471  | 2.2662804 | 0           | 0           | 0          | 3653        | tags=61%, list=19%, signal=75% |
| GNF2_CDC20 | 55   | 0.66336524 | 2.2533634 | 0           | 0           | 0          | 3785        | tags=62%, list=19%, signal=77% |
| GNF2_HMMR  | 47   | 0.6797286  | 2.2286162 | 0           | 0           | 0          | 3785        | tags=68%, list=19%, signal=84% |
| GNF2_CDC2  | 61   | 0.6328634  | 2.2126033 | 0           | 0           | 0          | 3653        | tags=54%, list=19%, signal=66% |
| GNF2_CENPF | 61   | 0.636856   | 2.1734078 | 0           | 1.60E-04    | 0.001      | 3653        | tags=56%, list=19%, signal=68% |
| GNF2_CENPE | 40   | 0.6784023  | 2.1681633 | 0           | 1.40E-04    | 0.001      | 3653        | tags=60%, list=19%, signal=74% |
| GNF2_HPX   | 111  | 0.562162   | 2.148408  | 0           | 1.25E-04    | 0.001      | 1688        | tags=32%, list=9%, signal=34%  |
| MODULE_24  | 404  | 0.48340335 | 2.1414783 | 0           | 1.12E-04    | 0.001      | 2470        | tags=31%, list=13%, signal=35% |
| GNF2_HP1   | 111  | 0.5525837  | 2.114176  | 0           | 2.00E-04    | 0.002      | 1688        | tags=32%, list=9%, signal=34%  |
| GNF2_TST   | 92   | 0.5701473  | 2.1135342 | 0           | 1.84E-04    | 0.002      | 1688        | tags=33%, list=9%, signal=36%  |
| MODULE_342 | 202  | 0.5081765  | 2.1120644 | 0           | 2.52E-04    | 0.003      | 1930        | tags=34%, list=10%, signal=38% |
| GNF2_MKI67 | 28   | 0.71962315 | 2.095437  | 0           | 3.16E-04    | 0.004      | 3652        | tags=71%, list=19%, signal=88% |
| GNF2_PCNA  | 67   | 0.5948131  | 2.0905054 | 0           | 3.72E-04    | 0.005      | 4503        | tags=60%, list=23%, signal=77% |
| GNF2_LCAT  | 105  | 0.5475117  | 2.084383  | 0           | 3.49E-04    | 0.005      | 2034        | tags=33%, list=10%, signal=37% |
| GNF2_BUB1  | 26   | 0.70440525 | 2.075836  | 0           | 3.95E-04    | 0.006      | 4113        | tags=65%, list=21%, signal=83% |
| GNF2_RRM2  | 39   | 0.6553588  | 2.0745828 | 0           | 3.73E-04    | 0.006      | 3785        | tags=64%, list=19%, signal=79% |
| GNF2_ESPL1 | 35   | 0.6514922  | 2.0113218 | 0           | 0.001224449 | 0.02       | 3785        | tags=63%, list=19%, signal=78% |
| GNF2_GSTM1 | 93   | 0.5400912  | 2.004573  | 0           | 0.001499126 | 0.026      | 1688        | tags=30%, list=9%, signal=33%  |
| MODULE_180 | 115  | 0.5121064  | 1.989555  | 0           | 0.001798731 | 0.033      | 2229        | tags=39%, list=11%, signal=44% |
| GNF2_MCM4  | 53   | 0.58221394 | 1.9832239 | 0.001941748 | 0.001918978 | 0.037      | 3886        | tags=55%, list=20%, signal=68% |

**Table S2 (Related to Figure 3). Functional annotation for control vs BRCA1<sup>mut</sup>-FTE organoids at 4 months by IPA software**

|     | Categories                                                                          | Diseases or Functions Annotation         | p-value  | z-score | Gene List             | # Molecules |
|-----|-------------------------------------------------------------------------------------|------------------------------------------|----------|---------|-----------------------|-------------|
| 1   | Cancer,Organismal Injury and Abnormalities                                          | Extracranial solid tumor                 | 2.56-48  | 1.023   | AT1FC ABCB11,ABCC3    | 1591        |
| 2   | Cancer,Organismal Injury and Abnormalities                                          | Solid tumor                              | 7.95E-48 | 0.139   | AT1FC ABCB11,ABCC3    | 1598        |
| 3   | Cancer,Organismal Injury and Abnormalities                                          | Cancer                                   | 1.5E-47  | 0.821   | AT1FC ABCB11,ABCC3    | 1597        |
| 4   | Cancer,Organismal Injury and Abnormalities                                          | Malignant solid tumor                    | 1.92E-47 | 0.327   | AT1FC ABCB11,ABCC3    | 1590        |
| 5   | Cancer,Organismal Injury and Abnormalities                                          | Non-hematological solid tumor            | 5.85E-44 | 0.351   | AT1FC ABCB11,ABCC3    | 1562        |
| 6   | Cancer,Organismal Injury and Abnormalities                                          | Nonhematologic malignant neoplasm        | 1.15E-43 | 0.587   | AT1FC ABCB11,ABCC3    | 1557        |
| 7   | Cancer,Organismal Injury and Abnormalities                                          | Tumorigenesis of tissue                  | 1.52E-42 | 0.898   | AT1FC ABCB11,ABCC3    | 1544        |
| 8   | Cancer,Organismal Injury and Abnormalities                                          | Abdominal neoplasm                       | 2.38E-41 | 1.665   | AT1FC ABCB11,ABCC3    | 1541        |
| 9   | Cancer,Organismal Injury and Abnormalities                                          | Non-melanoma solid tumor                 | 1.53E-40 | -0.481  | AT1FC ABCB11,ABCC3    | 1544        |
| 10  | Cancer,Organismal Injury and Abnormalities                                          | Carcinoma                                | 6.19E-40 | 0.771   | AT1FC ABCB11,ABCC3    | 1531        |
| 11  | Cancer,Organismal Injury and Abnormalities                                          | Epithelial neoplasm                      | 7.53E-40 | 0.511   | AT1FC ABCB11,ABCC3    | 1533        |
| 12  | Cancer,Organismal Injury and Abnormalities                                          | Abdominal cancer                         | 2.81E-39 | 2.458   | AT1FC ABCB11,ABCC3    | 1460        |
| 13  | Cancer,Organismal Injury and Abnormalities                                          | Adenocarcinoma                           | 3.78E-34 | 1.986   | AT1FC ABCB11,ABCC3    | 1363        |
| 14  | Cancer,Organismal Injury and Abnormalities                                          | Abdominal carcinoma                      | 1.30E-32 | 2.431   | AT1FC ABCB11,ABCC3    | 1402        |
| 15  | Cancer,Gastrointestinal Disease,Organismal Injury and Abnormalities                 | Digestive organ tumor                    | 2.73E-32 | 1.602   | AT1FC ABCB11,ABCC3    | 1394        |
| 16  | Cancer,Organismal Injury and Abnormalities                                          | Abdominal adenocarcinoma                 | 2.97E-31 | 1.673   | AT1FC ABCB11,ABCC3    | 1329        |
| 17  | Cancer,Gastrointestinal Disease,Organismal Injury and Abnormalities                 | Digestive system cancer                  | 1.81E-29 | 2.298   | AT1FC ABCB11,ABCC3    | 1359        |
| 18  | Cancer,Organismal Injury and Abnormalities                                          | Genitourinary tumor                      | 5.49E-28 | 0.512   | AT1FC ABCB3,ABCF2,F   | 1078        |
| 19  | Cancer,Gastrointestinal Disease,Organismal Injury and Abnormalities                 | Gastrointestinal tumor                   | 8.6E-28  | 0.255   | ABCB11,ABCC3,ABCF     | 1266        |
| 20  | Cancer,Organismal Injury and Abnormalities                                          | Malignant genitourinary solid tumor      | 3.74E-27 | 1.320   | AT1FC ABCB3,ABCF2,F   | 1049        |
| 21  | Cancer,Gastrointestinal Disease,Organismal Injury and Abnormalities                 | Gastrointestinal tract cancer            | 1.21E-25 | 1.388   | ABCB11,ABCC3,ABCF     | 1253        |
| 22  | Cancer,Gastrointestinal Disease,Organismal Injury and Abnormalities                 | Intestinal tumor                         | 2.87E-25 | 0.722   | ABCB11,ABCC3,ABCF     | 1211        |
| 23  | Cancer,Gastrointestinal Disease,Organismal Injury and Abnormalities                 | Large intestine neoplasm                 | 5.19E-25 | 1.497   | ABCB11,ABCC3,ABCF     | 1209        |
| 24  | Cancer,Organismal Injury and Abnormalities                                          | Head and neck tumor                      | 7.29E-25 | -0.343  | AT1FC ABCB11,ABCC3    | 1248        |
| 25  | Cancer,Organismal Injury and Abnormalities                                          | Incidence of tumor                       | 3.8E-24  | 0.537   | AT1FC ABCB11,ABCC3    | 1084        |
| 26  | Cancer,Gastrointestinal Disease,Organismal Injury and Abnormalities                 | Intestinal cancer                        | 1.9E-23  | 1.585   | ABCB11,ABCC3,ABCF     | 1199        |
| 27  | Cancer,Gastrointestinal Disease,Organismal Injury and Abnormalities                 | Malignant neoplasm of large intestine    | 2.28E-23 | 1.913   | ABCB11,ABCC3,ABCF     | 1198        |
| 28  | Cancer,Organismal Injury and Abnormalities                                          | Anogenital cancer                        | 3.48E-23 | -0.248  | AT1FC ABCB3,ABCF2,F   | 978         |
| 29  | Cancer,Organismal Injury and Abnormalities                                          | Head and neck cancer                     | 4.48E-23 | 0.026   | AT1FC ABCB11,ABCC3    | 1229        |
| 30  | Cancer,Organismal Injury and Abnormalities                                          | Head and neck carcinoma                  | 2.34E-22 | 0       | AT1FC ABCB11,ABCC3    | 1220        |
| 31  | Cancer,Organismal Injury and Abnormalities                                          | Cancer of secretory structure            | 2.81E-22 | 0.28    | AT1FC ABCB11,ABCC3    | 1220        |
| 32  | Cancer,Endocrine System Disorders,Organismal Injury and Abnormalities               | Endocrine gland tumor                    | 6.67E-22 | 0.072   | AT1FC ABCB11,ABCC3    | 1183        |
| 33  | Cancer,Organismal Injury and Abnormalities                                          | Pelvic tumor                             | 7.89E-22 | -0.242  | AT1FC ABCB3,ABCF2,F   | 947         |
| 34  | Cancer,Organismal Injury and Abnormalities                                          | Breast or gynecological cancer           | 9.88E-22 | 1.363   | AT1FC ABCB3,ABCF2,F   | 933         |
| 35  | Cancer,Organismal Injury and Abnormalities                                          | Pelvic cancer                            | 1.37E-21 | 0.114   | AT1FC ABCB3,ABCF2,F   | 933         |
| 36  | Cancer,Organismal Injury and Abnormalities                                          | Frequency of tumor                       | 1.85E-21 | 1.137   | AT1FC ABCB11,ABCC3    | 1045        |
| 37  | Cancer,Organismal Injury and Abnormalities                                          | Tumorigenesis of epithelial neoplasm     | 2.81E-21 | 1.111   | AT1FC ABCB11,ABCC3    | 1045        |
| 38  | Cancer,Organismal Injury and Abnormalities                                          | Nonlipitular endocrine tumor             | 2.78E-21 | 0.179   | AT1FC ABCB11,ABCC3    | 1175        |
| 39  | Cancer,Organismal Injury and Abnormalities                                          | Development of carcinoma                 | 4.96E-21 | 1.388   | AT1FC ABCB11,ABCC3    | 1018        |
| 40  | Cancer,Organismal Injury and Abnormalities                                          | Genitourinary cancer                     | 6.28E-21 | 1.445   | AT1FC ABCB3,ABCF2,F   | 922         |
| 41  | Cancer,Organismal Injury and Abnormalities                                          | Development of malignant tumor           | 7.19E-21 | 1.189   | AT1FC ABCB11,ABCC3    | 1028        |
| 42  | Cancer,Organismal Injury and Abnormalities                                          | Tumorigenesis of reproductive tract      | 8.6E-21  | 0.239   | AT1FC ABCB3,ABCF2,F   | 664         |
| 43  | Cancer,Organismal Injury and Abnormalities                                          | Female genital neoplasm                  | 8.89E-21 | 0.239   | AT1FC ABCB3,ABCF2,F   | 664         |
| 44  | Cancer,Organismal Injury and Abnormalities                                          | Female genital tract cancer              | 1.33E-20 | 0.137   | AT1FC ABCB3,ABCF2,F   | 646         |
| 45  | Cancer,Gastrointestinal Disease,Organismal Injury and Abnormalities                 | Gastrointestinal carcinoma               | 1.87E-20 | 0.426   | ABCB11,ABCC3,ABCF     | 1187        |
| 46  | Cancer,Organismal Injury and Abnormalities                                          | Neck neoplasm                            | 2.01E-20 | 0.141   | AT1FC ABCB11,ABCC3    | 1172        |
| 47  | Cancer,Endocrine System Disorders,Organismal Injury and Abnormalities               | Thyroid gland tumor                      | 8.8E-20  | 0.239   | AT1FC ABCB11,ABCC3    | 1159        |
| 48  | Inflammatory Response,Organismal Injury and Abnormalities                           | Inflammation of organ                    | 1.06E-19 | -1.399  | ABCB11,ACE2,ACKR4     | 275         |
| 49  | Cancer,Organismal Injury and Abnormalities                                          | Genital tumor                            | 1.83E-19 | -0.223  | AT1FC ABCB3,ABCF2,F   | 896         |
| 50  | Organismal Development                                                              | Morphology of body cavity                | 2.8E-19  | 0.114   | ABCB11,ACE2,ACSL1     | 319         |
| 51  | Cancer,Gastrointestinal Disease,Organismal Injury and Abnormalities                 | Gastrointestinal adenocarcinoma          | 3.69E-19 | 0.555   | ABCB11,ABCC3,ABCF     | 1147        |
| 52  | Cancer,Organismal Injury and Abnormalities                                          | Genital tract cancer                     | 3.84E-19 | -0.655  | AT1FC ABCB3,ABCF2,F   | 896         |
| 53  | Cancer,Endocrine System Disorders,Organismal Injury and Abnormalities               | Endocrine cancer                         | 7.15E-19 | 0.137   | AT1FC ABCB11,ABCC3    | 1158        |
| 54  | Cancer,Endocrine System Disorders,Organismal Injury and Abnormalities               | Endocrine carcinoma                      | 7.82E-19 | 0.137   | AT1FC ABCB11,ABCC3    | 1154        |
| 55  | Cancer,Organismal Injury and Abnormalities                                          | Thyroid cancer                           | 1.31E-19 | 0.137   | AT1FC ABCB11,ABCC3    | 1154        |
| 56  | Cancer,Endocrine System Disorders,Organismal Injury and Abnormalities               | Thyroid carcinoma                        | 1.69E-18 | 0.137   | AT1FC ABCB11,ABCC3    | 1149        |
| 57  | Cancer,Organismal Injury and Abnormalities                                          | Genitourinary adenocarcinoma             | 5.73E-18 | 1.709   | AT1FC ABCB3,ABCF2,F   | 924         |
| 58  | Organismal Development                                                              | Abnormal morphology of abdomen           | 1.87E-17 | 0.816   | ABCB11,ABCC3,ABCF     | 1122        |
| 59  | Cancer,Gastrointestinal Disease,Organismal Injury and Abnormalities                 | Intestinal carcinoma                     | 1.87E-17 | 0.816   | ABCB11,ABCC3,ABCF     | 1122        |
| 60  | Cancer,Organismal Injury and Abnormalities                                          | Large intestine carcinoma                | 2.48E-17 | 0.265   | ABCB11,ABCC3,ABCF     | 1121        |
| 61  | Cancer,Organismal Injury and Abnormalities                                          | Breast or pancreatic cancer              | 2.9E-17  | 0.13    | AT1FC ABCB3,ABCF2,F   | 627         |
| 62  | Cancer,Organismal Injury and Abnormalities                                          | Development of genital tumor             | 3.55E-17 | 0.13    | AT1FC ABCB3,ABCF2,F   | 627         |
| 63  | Cancer,Organismal Injury and Abnormalities                                          | Neoplasia of cells                       | 9.27E-17 | 0.896   | AT1FC ABCB11,ABCC3    | 768         |
| 64  | Cancer,Organismal Injury and Abnormalities                                          | Female genital tract sarcoma carcinoma   | 1.0E-16  | 0.249   | AGER,ALDH1A3,ANKX     | 127         |
| 65  | Dermatological Diseases and Conditions,Organismal Injury and Abnormalities          | Psoriasis                                | 1.85E-16 | 2.449   | AGER,ALDH1A3,ANKX     | 127         |
| 66  | Cancer,Gastrointestinal Disease,Organismal Injury and Abnormalities                 | Intestinal adenocarcinoma                | 1.95E-16 | 0.9     | ABCB11,ABCC3,ABCF     | 1109        |
| 67  | Cancer,Organismal Injury and Abnormalities                                          | Chronic inflammatory disorder            | 2.59E-16 | 1.247   | AGER,ACTA1,ADCY8      | 1109        |
| 68  | Cancer,Gastrointestinal Disease,Organismal Injury and Abnormalities                 | Large intestine adenocarcinoma           | 2.72E-16 | 0.9     | ABCB11,ABCC3,ABCF     | 1108        |
| 69  | Cancer,Organismal Injury and Abnormalities                                          | Breast or ovarian cancer                 | 5.02E-16 | -0.063  | ABCB3,ABCF2,ABLIM1    | 527         |
| 70  | Cancer,Organismal Injury and Abnormalities                                          | Breast or colorectal cancer              | 5.5E-16  | 1.148   | ABCB3,ABCF2,ABLIM1    | 527         |
| 71  | Digestive System Development and Function                                           | Morphology of digestive system           | 1.02E-15 | 0.137   | ABCB11,ACGR2,ACTR2    | 155         |
| 72  | Organismal Development                                                              | Abnormal morphology of body cavity       | 1.1E-15  | -0.137  | AGER,ACE2,ACSL1       | 144         |
| 73  | Cellular Movement                                                                   | Cell movement                            | 3.22E-15 | -0.801  | ACE2,ACKR4,ADAMT5     | 407         |
| 74  | Cancer,Organismal Injury and Abnormalities                                          | Development of adenocarcinoma            | 3.33E-15 | 1.522   | ABCB11,ABCC3,ABCF     | 684         |
| 75  | Gastrointestinal Disease,Organismal Injury and Abnormalities                        | Colorectal cancer                        | 3.74E-15 | 0.935   | ABCB3,ABCF2,ABLIM1    | 527         |
| 76  | Cancer,Organismal Injury and Abnormalities                                          | Advanced malignant tumor                 | 8.5E-15  | 0.791   | ABCB3,ABLIM1,AFAP1    | 216         |
| 77  | Digestive System Development and Function,Gastrointestinal Disease                  | Abnormal morphology of digestive system  | 2.07E-14 | 0.137   | ABCB11,AGR2,ACTR2     | 126         |
| 78  | Cancer,Organismal Injury and Abnormalities                                          | Melanoma                                 | 3.27E-14 | -0.651  | AT1FC ABCB11,ABCC3    | 968         |
| 79  | Cancer,Organismal Injury and Abnormalities                                          | Uterine tumor                            | 6.66E-14 | 0.137   | AT1FC ACSL1,ACSM3,J   | 505         |
| 80  | Cancer,Organismal Injury and Abnormalities                                          | Female genital tract adenocarcinoma      | 6.8E-14  | 0.137   | ABCB3,ABCF2,ABLIM1    | 525         |
| 81  | Cellular Movement                                                                   | Migration of cell                        | 1.02E-13 | -0.95   | AT1FC ADAR1,ADCY8     | 364         |
| 82  | Cancer,Gastrointestinal Disease,Organismal Injury and Abnormalities                 | Colorectal cancer                        | 1.06E-13 | 1.497   | ABCB3,ABCF2,ABLIM1    | 725         |
| 83  | Cancer,Organismal Injury and Abnormalities                                          | Pelvic adenocarcinoma                    | 2.19E-13 | 0.137   | AT1FC ABCB3,ABCF2,F   | 733         |
| 84  | Inflammatory Response                                                               | Inflammation of anatomic region          | 2.40E-13 | -1.028  | ABCB11,ACE2,ACKR4     | 223         |
| 85  | Cancer,Organismal Injury and Abnormalities                                          | Serous adenocarcinoma                    | 3.39E-13 | 0.137   | ABLIM2,ACT2,ADCY2     | 171         |
| 86  | Cancer,Organismal Injury and Abnormalities                                          | Advanced malignant solid tumor           | 4.13E-13 | 0.998   | ABCB3,AFAP1,LAGR5     | 153         |
| 87  | Cancer,Organismal Injury and Abnormalities                                          | Uterine cancer                           | 5.25E-13 | 0.137   | AT1FC ACSL1,ACSM3,J   | 505         |
| 88  | Cancer,Organismal Injury and Abnormalities                                          | Extraadrenal retroperitoneal tumor       | 1.03E-12 | 0.17    | ABCB11,ABCC3,ABOJ     | 507         |
| 89  | Cancer,Gastrointestinal Disease,Organismal Injury and Abnormalities                 | Colorectal cancer                        | 1.08E-12 | 1.913   | ABCB11,ABCF2,ABLIM1   | 708         |
| 90  | Inflammatory Response                                                               | Inflammation of body cavity              | 1.81E-12 | -1.166  | ABCB11,ACE2,ACKR4     | 223         |
| 91  | Endocrine System Disorders,Organismal Injury and Abnormalities,Reproductive System  | Gonadal tumor                            | 2.19E-12 | 0.647   | ABCB3,ABCF2,ABLIM1    | 301         |
| 92  | Cancer,Organismal Injury and Abnormalities,Reproductive System                      | Respiratory system tumor                 | 3.66E-12 | 1.322   | ABCB11,ABCC3,ABOJ     | 460         |
| 93  | Endocrine System Disorders,Organismal Injury and Abnormalities,Reproductive System  | Ovarian lesion                           | 4.81E-12 | 0.137   | ABCB3,ABCF2,ABLIM1    | 289         |
| 94  | Endocrine System Disorders,Organismal Injury and Abnormalities,Reproductive System  | Ovarian tumor                            | 8.7E-12  | 0.447   | ABCB3,ABCF2,ABLIM1    | 289         |
| 95  | Dermatological Diseases and Conditions,Organismal Injury and Abnormalities          | Skin lesion                              | 8.7E-12  | 0.113   | AT1FC ABCB11,ABCC3    | 877         |
| 96  | Endocrine System Disorders,Organismal Injury and Abnormalities,Reproductive System  | Ovarian cancer                           | 8.8E-12  | 0.137   | ABCB3,ABCF2,ABLIM1    | 289         |
| 97  | Cancer,Organismal Injury and Abnormalities                                          | Advanced extracranial solid tumor        | 1.02E-11 | 1.12    | ABCB3,ANKX,ANKX8      | 125         |
| 98  | Cancer,Organismal Injury and Abnormalities                                          | Malignant neoplasm of male genital organ | 1.24E-11 | 0.13    | AT1FC ABO,ACSM3,AD    | 530         |
| 99  | Organismal Development                                                              | Abnormal growth in endocrine system      | 1.44E-11 | 0.137   | ADAM2,AFOPH,BCAN      | 88          |
| 100 | Cell-To-Cell Signaling and Interaction                                              | Interaction of tumor cell lines          | 1.63E-11 | 0.85    | ADAM2,AFOPH,BCAN      | 92          |
| 101 | Organismal Injury and Abnormalities,Reproductive System                             | Abnormality of endometrium               | 1.89E-11 | -0.359  | AT1FC ACSL1,ACSM3,J   | 449         |
| 102 | Cancer,Organismal Injury and Abnormalities                                          | Malignant neoplasm                       | 2.44E-11 | 0.137   | AT1FC ABO,ACSM3,AD    | 449         |
| 103 | Cancer,Organismal Injury and Abnormalities                                          | Cancer of cells                          | 2.82E-11 | 0.579   | ABCB11,ABCC3,ABLIM1   | 630         |
| 104 | Cancer,Organismal Injury and Abnormalities                                          | Prostate cancer                          | 3E-11    | 0.762   | AT1FC ABO,ACSM3,AD    | 522         |
| 105 | Cancer,Organismal Injury and Abnormalities                                          | Malignant solid organ tumor              | 3.13E-11 | 0.423   | ABCB3,ABCF2,ABLIM1    | 420         |
| 106 | Endocrine System Disorders,Organismal Injury and Abnormalities,Reproductive System  | Primary ovarian cancer                   | 4.14E-11 | 0.137   | AGER,ANXA10,ACOL1     | 26          |
| 107 | Organismal Survival                                                                 | Organismal death                         | 5.24E-11 | -0.83   | ABCB11,ACE2,ACTA1     | 393         |
| 108 | Cancer,Organismal Injury and Abnormalities                                          | Malignant solid organ tumor              | 6.27E-11 | 1.13    | AT1FC ABCB11,ABCC3    | 875         |
| 109 | Cancer,Organismal Injury and Abnormalities                                          | Prostatic tumor                          | 5.34E-11 | -0.599  | AT1FC ABO,ACSM3,AD    | 523         |
| 110 | Organismal Survival                                                                 | Mortality or mortality                   | 6.21E-11 | -0.726  | ABCB11,ACE2,ACTA1     | 397         |
| 111 | Cell-To-Cell Signaling and Interaction                                              | Binding of tumor cell lines              | 7E-11    | 0.731   | ADAM2,AFOPH,BCAN      | 88          |
| 112 | Disorders,Inflammatory Disease,Organismal Injury and Abnormalities,Skeletal and M   | Rheumatic Disease                        | 7.99E-11 | -1.805  | ACSL1,ACSL5,ACTA1     | 225         |
| 113 | Cancer,Dermatological Diseases and Conditions,Organismal Injury and Abnormalities   | Skin tumor                               | 8.45E-11 | 1.322   | AT1FC ABCB11,ABCC3    | 864         |
| 114 | Gastrointestinal Disease,Hepatic System Disease,Organismal Injury and Abnormalities | Liver lesion                             | 9.37E-11 | 0.931   | AT1FC ABCB11,ABCC3    | 728         |
| 115 | Cancer,Dermatological Diseases and Conditions,Organismal Injury and Abnormalities   | Skin cancer                              | 1.07E-10 | -0.6    | AT1FC ABCB11,ABCC3    | 859         |
| 116 | Cancer,Organismal Injury and Abnormalities                                          | Malignant neoplasm of retroperitoneum    | 1.11E-10 | 0.862   | ABCB11,ABO,ACOL1      | 455         |
| 117 | Tissue Development                                                                  | Growth of epithelial tissue              | 1.15E-10 | 1.111   | AGER,AGR2,ACTR2,A     | 138         |
| 118 | Cancer,Organismal Injury and Abnormalities                                          | Endometrium tumor                        | 1.3E-10  | 0.137   | AT1FC ACSL1,ACSM3,J   | 441         |
| 119 | Endocrine System Disorders,Organismal Injury and Abnormalities,Reproductive System  | Advanced ovarian carcinoma               | 1.3E-10  | 0.137   | ANKX8,ANKX11,ARL1     | 37          |
| 120 | Protein Synthesis                                                                   | Metabolism of cellular protein           | 1.33E-10 | 0.137   | AFP,APPA1,APPA2,AF    | 47          |
| 121 | Cancer,Organismal Injury and Abnormalities                                          | Endometrial cancer                       | 1.43E-10 | 0.137   | AT1FC ACSL1,ACSM3,J   | 440         |
| 122 | Cellular Growth and Proliferation,Tissue Development                                | Quantity of cells                        | 1.78E-10 | 0.37    | AGER,AGR2,AREGA       | 104         |
| 123 | Endocrine System Disorders,Organismal Injury and Abnormalities,Reproductive System  | Proliferation of epithelial cells        | 1.86E-10 | -1.518  | AGER,AGR2,AREGA       | 104         |
| 124 | Organismal Survival                                                                 | Advanced ovarian cancer                  | 1.9E-10  | 0.137   | ANKX8,ANKX11,ARL1     | 39          |
| 125 | Inflammatory Response                                                               | Systemic autoinflammatory syndrome       | 1.96E-10 | 0.164   | ACSL1,ACSL5,ACTA1     | 231         |
| 126 | Cancer,Organismal Injury and Abnormalities                                          | Squamous cell tumor                      | 2.4E-10  | 0.96    | ABCB11,ABCC3,ABOJ     | 474         |
| 127 | Endocrine System Disorders,Organismal Injury and Abnormalities,Reproductive System  | Advanced ovarian adenocarcinoma          | 2.95E-10 | 0.137   | ANKX8,ANKX11,ARL1     | 33          |
| 128 | Digestive System Development and Function,Gastrointestinal Disease                  | Morphology of Intestine                  | 3.69E-10 | 0.137   | AGER,AFAP1,AFAP2      | 192         |
| 129 | Endocrine System Disorders,Organismal Injury and Abnormalities,Reproductive System  | Serous ovarian adenocarcinoma            | 3.09E-10 | 0.137   | ANKX8,ANKX11,ARL1     | 55          |
| 130 | Cancer,Organismal Injury and Abnormalities                                          | Squamous cell carcinoma                  | 3.37E-10 | 1.119   | ABCB11,ABCC3,ABOJ     | 473         |
| 131 | Lipid Metabolism,Biochemistry                                                       | Metabolism of cholesterol                | 3.79E-10 | 0.599   | ACSL1,ACSL5,ALDH1     | 192         |
| 132 | Cancer,Organismal Injury and Abnormalities                                          | Primary tumor                            | 4.11E-10 | 0.8     | AFAP1,LAGR2,ANKX      | 86          |
| 133 | Organismal Injury and Abnormalities                                                 | Benign lesion                            | 4.16E-10 | -0.192  | ADAR1,AGER,AJUB       | 173         |
| 134 | Cancer,Dermatological Diseases and Conditions,Organismal Injury and Abnormalities   | Cutaneous melanoma                       | 5.08E-10 | 0.137   | ABCB11,ABCC3,ABCF2,F  | 924         |
| 135 | nc Function,Gastrointestinal Disease,Organ Morphology,Organismal Development,Org    | Abnormal morphology of intestine         | 5.44E-10 | 0.137   | AGER,AFAP1,AFAP2      | 53          |
| 136 | Cancer,Organismal Injury and Abnormalities                                          | Lymphohematopoietic cancer               | 6.93E-10 | -0.338  | AT1FC ABCB11,ABCC3    | 464         |
| 137 | Cancer,Organismal Injury and Abnormalities                                          | Uterine serous papillary cancer          | 7.37E-10 | 0.137   | AGER,AGR2,AREGA       | 104         |
| 138 | Cellular Movement                                                                   | Invasion of cells                        | 7.37E-10 | 0.027   | ABLIM1,AFAP1,LAGR5    | 189         |
| 139 | Gastrointestinal Disease,Inflammatory Disease                                       | Inflammatory Bowel Disease               | 7.82E-10 | 1.628   | ACSL1,AGER,B3GAT1     | 85          |
| 140 | Cancer,Organismal Injury and Abnormalities                                          | Thoracic neoplasm                        | 7.84E-10 | 0.705   | AT1FC ABCB11,ABCC3    | 875         |
| 141 | Cellular Development,Tissue Development                                             | Inflammation of epithelial tissue        | 9.56E-10 | 1.571   | AGER,AGR2,AREGA,AFAP1 | 84          |
| 142 | Cancer,Organismal Injury and Abnormalities,Reproductive System                      | Lung tumor                               | 1.11E-09 | 1.467   | AT1FC ABCB3,ABCF2,F   | 387         |
| 143 | Cancer,Organismal Injury and Abnormalities                                          | Lymphohematopoietic neoplasia            | 1.17E-09 | -0.163  | AT1FC ABCB11,ABCC3    | 468         |
| 144 | Cancer,Organismal Injury and Abnormalities                                          | Advanced adenocarcinoma                  | 1.19E-09 | 0.137   | ABCB3,ANKX8,ANKX11    | 53          |
| 145 | Cellular Development,Tissue Development                                             | Differentiation of epithelial cells      | 1.21     |         |                       |             |

|     |                                                                                       |                                             |             |        |        |                    |     |
|-----|---------------------------------------------------------------------------------------|---------------------------------------------|-------------|--------|--------|--------------------|-----|
| 151 | Cancer,Organismal Injury and Abnormalities                                            | Intraothacic malignant tumor                | 2.05E-09    | 1.507  |        | ABC811.ABCC3.ABOJ  | 380 |
| 152 | Organismal Injury and Abnormalities,Reproductive System Disease                       | Benign pelvic disease                       | 2.23E-09    |        |        | ADARB1.ALDH1A1.AL  | 110 |
| 153 | Cancer,Gastrointestinal Disease,Organismal Injury and Abnormalities                   | Hepatolytic carcinoma                       | 2.39E-09    | 2.282  | -0.855 | A1CF.ABC811.ABCC3  | 619 |
| 154 | Cancer,Hematological Disease,Organismal Injury and Abnormalities                      | Hematopoietic neoplasm                      | 2.32E-09    | -0.162 |        | A1CF.ABC811.ABCC3  | 464 |
| 155 | Cancer,Hematological Disease,Organismal Injury and Abnormalities                      | Hematologic cancer                          | 2.89E-09    | -0.338 |        | A1CF.ABC811.ABCC3  | 458 |
| 156 | Cellular Development and Proliferation                                                | Cell proliferation of cell lines            | 2.69E-09    | 0.988  |        | ABL1M1.ACCLS.ADM   | 293 |
| 157 | Lipid Metabolism,Molecular Transport,Small Molecule Biochemistry                      | Concentration of triacylglycerol            | 2.64E-09    | 0.848  |        | ACSL1.ADCYAP1.AGT  | 71  |
| 158 | Cancer,Organismal Injury and Abnormalities,Respiratory Disease                        | Lung carcinoma                              | 2.69E-09    | 0.51   |        | ABC811.ABCC3.ABOJ  | 353 |
| 159 | Cancer,Organismal Injury and Abnormalities,Respiratory Disease                        | Lung cancer                                 | 2.71E-09    | 1.37   |        | ABC811.ABCC3.ABOJ  | 377 |
| 160 | Cancer,Organismal Injury and Abnormalities                                            | Primary solid tumor                         | 2.77E-09    |        |        | AFAP11.AGR2.ANXA   | 83  |
| 161 | Cancer,Gastrointestinal Disease,Hepatic System Disease,Organismal Injury and Abnormal | Hepatobiliary system cancer                 | 2.99E-09    | 1.774  |        | A1CF.ABC811.ABCC3  | 637 |
| 162 | Cell-To-Cell Signaling and Interaction                                                | Adhesion of tumor cell lines                | 3.21E-09    | 1.266  |        | ADAM28.APOH.BCAN   | 69  |
| 163 | Cancer,Hematological Disease,Organismal Injury and Abnormalities                      | Neoplasia of carcinoma                      | 3.25E-09    |        |        | AGR2.APOA4.AREG.B  | 459 |
| 164 | Lipid Metabolism,Molecular Transport,Small Molecule Biochemistry                      | Concentration of lipid                      | 3.29E-09    | 0.856  |        | ABC811.ABCC3.ACS   | 151 |
| 165 | Lipid Metabolism,Molecular Transport,Small Molecule Biochemistry                      | Concentration of acylglycerol               | 4.03E-09    | 0.418  |        | ACSL1.ADCYAP1.AGT  | 75  |
| 166 | Gastrointestinal Disease,Inflammatory Response                                        | Inflammation of gastrointestinal tract      | 4.09E-09    | -1.518 |        | AGR2.APOA4.APOBEC  | 96  |
| 167 | Cancer,Organismal Injury and Abnormalities                                            | Benign tumors                               | 4.87E-09    | 0.208  |        | ADARB1.AGER.AJUB   | 152 |
| 168 | Cancer,Organismal Injury and Abnormalities,Reproductive System Disease                | Uterine carcinoma                           | 5.04E-09    |        |        | A1CF.ACSL1.ACSM3.J | 430 |
| 169 | Endocrine System Disorders,Gastrointestinal Disease,Organismal Injury and Abnorm      | Pancreatic tumor                            | 5.4E-09     | -0.181 |        | ABC811.ABCC3.ABOJ  | 388 |
| 170 | Gastrointestinal Disease,Organismal Injury and Abnormalities                          | Abnormality of large intestine              | 5.89E-09    | -0.182 |        | AGR2.APOA4.AREG.B  | 459 |
| 171 | Cancer,Organismal Injury and Abnormalities,Reproductive System Disease                | Breast cancer                               | 6.74E-09    | -0.048 |        | ABL1M1.ABO.ADM28   | 35  |
| 172 | Lipid Metabolism,Small Molecule Biochemistry                                          | Metabolism of triacylglycerol               | 6.81E-09    | 1.269  |        | ACSL1.ACCLS.ALDH1  | 31  |
| 173 | Cancer,Gastrointestinal Disease,Organismal Injury and Abnormalities                   | Colon tumor                                 | 7.48E-09    | 0.792  |        | ABC3.ABCF2.ABLM    | 608 |
| 174 | Cancer,Organismal Injury and Abnormalities                                            | Benign solid tumor                          | 8.02E-09    | 0.208  |        | ADARB1.AGER.AJUB   | 150 |
| 175 | Cardiovascular Disease                                                                | Occlusion of blood vessel                   | 8.48E-09    | -0.562 |        | ABO.AGER.ANGPTL3   | 102 |
| 176 | Cancer,Gastrointestinal Disease,Organismal Injury and Abnormalities                   | Development of digestive organ tumor        | 9.12E-09    | 1.379  |        | ABC3.ABCF2.ABLM    | 677 |
| 177 | Cancer,Organismal Injury and Abnormalities,Renal and Urological Disease               | Urinary tract cancer                        | 1.07E-08    | 0.151  |        | AC0040692.ADM28.J  | 314 |
| 178 | Development,Cellular Function and Interaction,Organismal Injury and Abnormalities,Tu  | Proliferation of tumor cells                | 1.092       | 1.092  |        | ADAM28.APCDD1.AP   | 83  |
| 179 | Cancer,Organismal Injury and Abnormalities                                            | Primary neoplasm                            | 1.37E-08    | 0.11   |        | AFAP11.AGR2.ANXA   | 94  |
| 180 | Cell-To-Cell Signaling and Interaction                                                | Activation of cells                         | 1.57E-08    | -0.798 |        | ACSL5.ADCYAP1.AFP  | 174 |
| 181 | Dermatological Diseases and Conditions,Organismal Injury and Abnormalities            | Exanthem of skin                            | 0.00000016  |        |        | C3.CHAC4B.CCL20.C  | 37  |
| 182 | Neurological Disease,Organismal Injury and Abnormalities                              | Epilepsy                                    | 1.69E-08    | 0.282  |        | ADCYAP1.AL.G13.ANC | 74  |
| 183 | Cancer,Gastrointestinal Disease,Organismal Injury and Abnormalities                   | Colon cancer                                | 1.81E-08    | 1.109  |        | ABC3.ABCF2.ABLM    | 599 |
| 184 | Neurological Disease                                                                  | Epilepsy or neurodevelopmental disorder     | 2.17E-08    | -0.262 |        | ADYAP1.AL.G13.ANC  | 91  |
| 185 | Cancer,Gastrointestinal Disease,Hepatic System Disease,Organismal Injury and Abnorma  | Liver cancer                                | 2.24E-08    | 1.626  |        | A1CF.ABC811.ABCC3  | 600 |
| 186 | Cardiovascular Disease,Organismal Injury and Abnormalities                            | Abnormal morphology of skin                 | 2.24E-08    |        |        | AP0A1.AREG.BCL2L1  | 52  |
| 187 | Cancer,Organismal Injury and Abnormalities,Respiratory Disease                        | Non-small cell lung carcinoma               | 0.00000023  | 1.938  |        | ABC811.ABCC3.ACE2  | 307 |
| 188 | Cardiovascular Disease,Organismal Injury and Abnormalities                            | Cell movement of tumor cell lines           | 2.45E-08    | 0.151  |        | ACKR4.ADM28.AGE    | 182 |
| 189 | Cardiovascular Disease,Organismal Injury and Abnormalities                            | Occlusion of artery                         | 0.00000025  | -0.562 |        | AGER.ANGPTL3.APOF  | 99  |
| 190 | Cancer,Gastrointestinal Disease,Hepatic System Disease,Organismal Injury and Abnorma  | Liver carcinoma                             | 2.75E-08    | 1.213  |        | A1CF.ABC811.ABCC3  | 580 |
| 191 | Cell Death and Survival                                                               | Necrosis                                    | 2.87E-08    | -0.273 |        | ABC3.ACE2.ACSL.J   | 410 |
| 192 | Cancer,Organismal Injury and Abnormalities,Renal and Urological Disease               | Urinary tract tumor                         | 2.89E-08    | 0.318  |        | AC0040692.ADM28.J  | 314 |
| 193 | Cancer,Organismal Injury and Abnormalities                                            | Lymphoreticular neoplasm                    | 2.98E-08    | -0.061 |        | A1CF.ABC811.ABCC3  | 405 |
| 194 | Digestive System Development and Function                                             | Development of digestive system             | 3.24E-08    | 2.2    |        | AGR2.ALDH1A1.APO3  | 82  |
| 195 | Inflammatory Disease,Inflammatory Response,Organismal Injury and Abnormalities,Sk     | Inflammation of joint                       | 3.83E-08    | -1.614 |        | ACSL1.ACTA1.ADM28  | 172 |
| 196 | Cancer,Organismal Injury and Abnormalities                                            | Extrapulmonary squamous cell carcinoma      | 4.01E-08    | -0.577 |        | ABC811.ABCC3.ABOJ  | 427 |
| 197 | Diseases and Conditions,Inflammatory Disease,Inflammatory Response,Organismal Inju    | Dermatits                                   | 4.07E-08    | 0.02   |        | ACKR4.AGER.AREG.B  | 82  |
| 198 | Cancer,Organismal Injury and Abnormalities                                            | Advanced stage carcinoma                    | 4.39E-08    |        |        | ABC3.ANXA.ANXAE    | 61  |
| 199 | Organ Morphology                                                                      | Abnormal morphology of epithelial tissue    | 4.39E-08    |        |        | ABC811.ADCYAP1.AG  | 82  |
| 200 | Dermatological Diseases and Conditions,Organismal Injury and Abnormalities            | Plaque psoriasis                            | 4.46E-08    |        |        | CCL20.CSTA.CXCL6.C | 33  |
| 201 | Active Tissue Disorders,Organismal Injury and Abnormalities,Skeletal and Muscular Dis | Non-traumatic arthropathy                   | 4.81E-08    | 0.207  |        | ACSL1.ACTA1.ADM28  | 150 |
| 202 | Immune System Disorders,Organismal Injury and Abnormalities,Reproductive System       | Ovarian serous tumor                        | 5.01E-08    |        |        | ABL.M2.ADCY2.AHAN  | 125 |
| 203 | Hematological System Development and Function,Tissue Morphology                       | Quantity of leukocytes                      | 5.16E-08    | -0.938 |        | ACKR4.ADCYAP1.AGE  | 176 |
| 204 | Cancer,Gastrointestinal Disease,Organismal Injury and Abnormalities                   | Upper gastrointestinal tract cancer         | 6.12E-08    | 0      |        | ADAM28.ADARB1.ADC  | 416 |
| 205 | Cancer,Gastrointestinal Disease,Organismal Injury and Abnormalities                   | Upper gastrointestinal tract cancer         | 6.59E-08    | -0.571 |        | ADAM28.ADARB1.ADC  | 418 |
| 206 | Neurological Disease,Organismal Injury and Abnormalities                              | Epilepsy                                    | 6.71E-08    | 0.152  |        | ADCYAP1.ANOS1      | 45  |
| 207 | Embryonic Development,Organismal Development                                          | Development of abdomen                      | 6.97E-08    | 1.268  |        | ADCYAP1.AGER.AGT   | 112 |
| 208 | Digestive System Development and Function                                             | Development of gastrointestinal tract       | 7.08E-08    | 1.864  |        | AGR2.APO3.BCL2L1   | 60  |
| 209 | Endocrine System Disorders,Organismal Injury and Abnormalities,Reproductive System    | Advanced serous ovarian adenocarcinoma      | 7.19E-08    |        |        | ANXA.ANXA11.ARL    | 28  |
| 210 | Cancer,Organismal Injury and Abnormalities,Respiratory Disease                        | Development of lung tumor                   | 8.19E-08    | 1.856  |        | ABC811.ABCC3.ABOJ  | 354 |
| 211 | Organ Morphology                                                                      | Abnormal morphology of gland                | 9.56E-08    |        |        | AGR2.AGTR2.ALDH1A  | 64  |
| 212 | Cancer,Gastrointestinal Disease,Organismal Injury and Abnormalities                   | Upper gastrointestinal carcinoma            | 0.000000103 |        |        | ADAM28.ADARB1.ADC  | 397 |
| 213 | Cancer,Organismal Injury and Abnormalities,Reproductive System Disease                | Prostatic carcinoma                         | 0.000000107 | 1      |        | ACKR4.ADM28.AGE    | 182 |
| 214 | Embryonic Development,Organismal Development                                          | Development of body trunk                   | 0.000000112 | 1.29   |        | ACE2.ADAP2.ADCYAF  | 205 |
| 215 | Immunological Disease                                                                 | Hypersensitivity reaction                   | 0.000000114 | 0.318  |        | ACKR4.AGER.BCL2L1  | 82  |
| 216 | Cancer,Organismal Injury and Abnormalities                                            | Metastatic solid tumor                      | 0.000000116 | 0.851  |        | ABC3.AFAP11.AGR    | 120 |
| 217 | Cancer,Gastrointestinal Disease,Inflammatory Response                                 | Chronic gastritis                           | 0.000000126 | 0.059  |        | A1CF.AGER.BCCL2    | 58  |
| 218 | al Disease,Inflammatory Disease,Inflammatory Response,Organismal Injury and Abno      | Rheumatoid arthritis                        | 0.000000133 | 0.077  |        | ACSL1.ACTA1.ADCYB  | 131 |
| 219 | Cellular Movement                                                                     | Invasion of tumor cell lines                | 0.000000131 | -0.004 |        | ABL.M1.AFAP11.AGE  | 149 |
| 220 | Cancer,Organismal Injury and Abnormalities                                            | Endometrial carcinoma                       | 0.000000139 |        |        | ABC3.ABCF2.ACE2.J  | 419 |
| 221 | Gastrointestinal Disease,Organismal Injury and Abnormalities                          | Gastric cancer                              | 0.000000144 | -0.708 |        | ADAM28.ADARB1.ADC  | 236 |
| 222 | Cancer,Organismal Injury and Abnormalities                                            | Ductal carcinoma                            | 0.00000015  | 1.709  |        | ABC811.ABO.ACAP1.J | 377 |
| 223 | Cancer,Organismal Injury and Abnormalities,Reproductive System Disease                | HER2-negative breast cancer                 | 0.000000153 |        |        | AGER.BRC1.CAV1.C   | 42  |
| 224 | Molecular Transport                                                                   | Quantity of metal                           | 0.00000016  | -0.396 |        | ABC3.ABCC3.ABOJ    | 83  |
| 225 | Cancer,Organismal Injury and Abnormalities                                            | HER2-negative cancer                        | 0.000000163 |        |        | AGER.BRC1.CAV1.C   | 44  |
| 226 | Cancer,Organismal Injury and Abnormalities,Reproductive System Disease                | Endometrial carcinoma                       | 0.000000164 |        |        | A1CF.ACSL1.ACSM3.J | 397 |
| 227 | Gastrointestinal Disease,Inflammatory Response                                        | Gastroenteritis                             | 0.000000167 | -1.647 |        | AGR2.APOA4.APOH.A  | 84  |
| 228 | Cancer,Gastrointestinal Disease,Organismal Injury and Abnormalities                   | Gastroesophageal cancer                     | 0.000000176 | 0      |        | ADAM28.ADARB1.ADC  | 258 |
| 229 | Hematological System Development and Function,Tissue Morphology                       | Quantity of blood cells                     | 0.000000182 | -0.977 |        | ACKR4.ADCYAP1.AGE  | 176 |
| 230 | Cancer,Organismal Injury and Abnormalities                                            | HER2 negative solid tumor                   | 0.000000183 |        |        | AGER.BRC1.CAV1.C   | 44  |
| 231 | Cardiovascular System Development and Function,Organismal Development                 | Angiogenesis                                | 0.000000186 | 0.486  |        | A1CF.AGER.AGTR2    | 165 |
| 232 | Dermatological Diseases and Conditions,Organismal Injury and Abnormalities            | Disorder of hair                            | 0.000000287 | -2.431 |        | APCDD1.AREG.BCL2   | 47  |
| 233 | Organ Morphology                                                                      | Morphology of skin                          | 0.000000292 |        |        | ACE2.APOA1.AREG.A  | 61  |
| 234 | Cellular Movement                                                                     | Homing of cells                             | 0.000000297 | -0.804 |        | ACKR4.AFP.AGER.AN  | 106 |
| 235 | Organ Morphology                                                                      | Concentration of ADCYAP1                    | 0.000000301 | 1.437  |        | CSBG1.ADCYAP1.AG   | 79  |
| 236 | Cancer,Organismal Injury and Abnormalities,Respiratory Disease                        | Development of lung carcinoma               | 0.000000304 | 1      |        | ABC811.ABCC3.ACE2  | 248 |
| 237 | Cardiovascular System Development and Function,Organismal Development                 | Vasculogenesis                              | 0.000000305 | 0.454  |        | A1CF.AGER.AGTR2.A  | 138 |
| 238 | Development,Cellular Function and Interaction,Organismal Injury and Abnormalities,Tu  | Proliferation of tumor cells                | 0.000000314 | 1.405  |        | ABC3.ABCF2.ABLM    | 608 |
| 239 | Neurological Disease,Organismal Injury and Abnormalities                              | Seizure disorder                            | 0.000000325 | -0.549 |        | ADARB1.ADCYAP1.AL  | 97  |
| 240 | Cellular Function and Maintenance                                                     | Cellular homeostasis                        | 0.000000328 | -0.188 |        | ABC3.ACAP1.ACSL1   | 259 |
| 241 | Lipid Metabolism,Molecular Transport,Small Molecule Biochemistry                      | Quantity of steroid                         | 0.000000329 | 0.891  |        | ABC811.ABCC3.ACS   | 88  |
| 242 | Cancer,Gastrointestinal Disease,Organismal Injury and Abnormalities                   | Stomach tumor                               | 0.000000339 | -0.685 |        | ADAM28.ADARB1.ADC  | 233 |
| 243 | Organismal Injury and Abnormalities,Reproductive System Disease                       | Endometriosis                               | 0.000000388 |        |        | ALDH1A3.ANK3.BRCA  | 73  |
| 244 | Cancer,Gastrointestinal Disease,Organismal Injury and Abnormalities                   | Gastric cancer                              | 0.000000424 |        |        | ADAM28.ADARB1.ADC  | 230 |
| 245 | Cancer,Organismal Injury and Abnormalities,Reproductive System Disease                | Angiogenesis of uterine tumor               | 0.000000435 |        |        | ABC3.ABCF2.ABLM    | 599 |
| 246 | Active Tissue Disorders,Organismal Injury and Abnormalities,Skeletal and Muscular Dia | Abnormality of cartilage tissue             | 0.000000437 | 0.388  |        | ADAMTSS.BMPER.CA   | 41  |
| 247 | al Disease,Inflammatory Disease,Inflammatory Response,Organismal Injury and Ab        | Enteritis                                   | 0.000000484 | -1.558 |        | AGR2.APOA4.APOH.A  | 79  |
| 248 | Cancer,Organismal Injury and Abnormalities,Respiratory Disease                        | Lung adenocarcinoma                         | 0.000000487 | 1.414  |        | ABC811.ABCC3.ACE2  | 246 |
| 249 | Lipid Metabolism,Molecular Transport,Small Molecule Biochemistry                      | Quantity of lipid                           | 0.000000491 | -1.109 |        | AGER.APOA1.AREG.   | 31  |
| 250 | al Disease,Inflammatory Disease,Inflammatory Response,Organismal Injury and Ab        | Inflammation of large intestine             | 0.000000492 | -1.182 |        | AGR2.APOA4.AREG.B  | 73  |
| 251 | al Disease,Inflammatory Disease,Inflammatory Response,Organismal Injury and Ab        | Colitis                                     | 0.00000052  | -1.054 |        | AGR2.APOA4.AREG.B  | 73  |
| 252 | Cancer,Gastrointestinal Disease,Organismal Injury and Abnormalities                   | Development of colorectal tumor             | 0.000000525 |        |        | ABC3.ABCF2.ABLM    | 599 |
| 253 | Endocrine System Disorders,Gastrointestinal Disease,Organismal Injury and Abnorm      | Pancreatic cancer                           | 0.00000058  | 0.518  |        | ABC811.ABO.ACAP1.J | 331 |
| 254 | Cancer,Dermatological Diseases and Conditions,Organismal Injury and Abnormalities     | Hyperplasia of epidermis                    | 0.000000582 | -1.432 |        | AGER.AGER.CAV1.CD  | 31  |
| 255 | Neurological Disease,Organismal Injury and Abnormalities                              | Seizures                                    | 0.000000589 | -0.686 |        | ADARB1.ADCYAP1.AL  | 87  |
| 256 | Cancer,Organismal Injury and Abnormalities                                            | Papillary adenocarcinoma                    | 0.000000593 |        |        | ABC3.ANXA.ANXAE    | 66  |
| 257 | Cancer,Organismal Injury and Abnormalities                                            | Papillary carcinoma                         | 0.000000611 |        |        | ABC3.ANXA.ANXAE    | 67  |
| 258 | Cardiovascular System Development and Function                                        | Development of vasculature                  | 0.000000642 | 0.519  |        | ACE2.AGER.AGTR2.A  | 181 |
| 259 | Cellular Movement                                                                     | Chemotaxis                                  | 0.000000664 | -0.485 |        | ACKR4.AFP.AGER.AN  | 100 |
| 260 | Organ Morphology                                                                      | Morphology of gland                         | 0.000000668 |        |        | AGR2.AGTR2.ALDH1A  | 79  |
| 261 | Cardiovascular Disease,Organismal Injury and Abnormalities                            | Atherosclerosis                             | 0.00000072  | -0.906 |        | AGER.ANGPTL3.APOF  | 85  |
| 262 | Cancer,Gastrointestinal Disease,Organismal Injury and Abnormalities                   | Lower respiratory tract disorder            | 0.000000766 | -0.516 |        | ABC3.AGER.ANKS1E   | 76  |
| 263 | Cancer,Gastrointestinal Disease,Organismal Injury and Abnormalities                   | Colorectal carcinoma                        | 0.00000081  |        |        | ABC3.ABCF2.ABLM    | 597 |
| 264 | ncer,Hematological Disease,Immunological Disease,Organismal Injury and Abnorma        | Leukemia                                    | 0.000000821 | 0.464  |        | A1CF.ABC811.ABCC3  | 310 |
| 265 | Cancer,Organismal Injury and Abnormalities,Reproductive System Disease                | Hormone receptor negative breast cancer     | 0.000000827 |        |        | AGER.BRC1.CAV1.C   | 38  |
| 266 | Cancer,Dermatological Diseases and Conditions,Organismal Injury and Abnormalities     | Hyperplasia of skin                         | 0.000000877 | -1.368 |        | AGER.AGER.CAV1.CD  | 32  |
| 267 | Cancer,Organismal Injury and Abnormalities,Reproductive System Disease                | Progesterone receptor negative breast tumor | 0.000000878 |        |        | AGER.BRC1.CAV1.C   | 38  |
| 268 | Cancer,Organismal Injury and Abnormalities                                            | Growth of malignant tumor                   | 0.000000887 | 0.627  |        | ADAM28.APCDD1.APC  | 81  |
| 269 | Cell Death and Survival                                                               | Apoptosis                                   | 0.000000941 | -0.119 |        | ABO.ACE2.ACSL1.ADJ | 399 |
| 270 | Digestive System Development and Function,Hepatic System Development and Functi       | Differentiation of hepatocytes              | 0.000000956 |        |        | BMP4.EZF1.FGF1.FOS | 10  |
| 271 | Cancer,Organismal Injury and Abnormalities,Reproductive System Disease                | Abnormality of limb                         | 0.000000956 | -0.893 |        | ATL1.BMP4.BMPER.CA | 64  |
| 272 | Cell-To-Cell Signaling and Interaction,Cellular Assembly and Organization             | Prostatic adenocarcinoma                    | 0.000000973 |        |        | A1CF.ABO.ACSM3.AD  | 415 |
| 273 | Cardiovascular System Development and Function,Cellular Movement                      | Cell movement of endothelial cells          | 0.000000985 | 1.037  |        | AJUBA.AMPH.ANK3.AJ | 114 |
| 274 | Cardiovascular System Development and Function,Cellular Movement                      | Quantity of small intestine cells           | 0.000000985 | -0.333 |        | ADCYAP1.APOC3.ASII | 80  |
| 275 | Molecular Transport                                                                   | Quantity of lipid                           | 0.000000985 |        |        | ABC3.ABCF2.ABLM    | 222 |
| 276 | Endocrine System Disorders,Organismal Injury and Abnormalities,Reproductive System    | Ovarian adenocarcinoma                      | 0.00000114  |        |        | ADCYAP1.ASIF.CCL2  | 35  |
| 277 | Cell-To-Cell Signaling and Interaction                                                | Intracellular communication                 | 0.00000121  |        |        | A1CF.ABC811.ABCC3  | 242 |
| 278 | ncer,Hematological Disease,Immunological Disease,Organismal Injury and Abnorma        | Acute myeloid leukemia                      | 0.00000123  | 0.059  |        | A1CF.ABC811.ABCC3  | 222 |
| 279 | ncer,Hematological Disease,Immunological Disease,Organismal Injury and Abnorma        | Abnormal morphology of bone                 | 0.00000123  |        |        | AGTR2.AREG.BMP4.B  | 80  |
| 280 | nd Function,Gastrointestinal Disease,Organ Morphology,Organismal Development,Org      | Abnormal morphology of small intestine      | 0.00000123  |        |        | AGER.AP1.M2.AREG.C | 25  |
| 281 | ncer,Hematological Disease,Immunological Disease,Organismal Injury and Abnorma        | Cell movement of leukocytes                 | 0.00000126  | 0.864  |        | A1CF.ABC811.ABCC3  | 247 |
| 282 | Cellular Movement                                                                     | Migration of tumor cell lines               | 0.00000129  | -0.067 |        | AGER.AGER.ARHGAP   | 150 |
| 283 | Digestive System Development and Function,Gastrointestinal Disease                    | Abnormal morphology of midgut               | 0.00000134  |        |        | AGER.AP1.M2.AREG.C | 26  |
| 284 | ular Movement,Hematological System Development and Function,Immune Cell Traffi        | Cell movement of granulocytes               | 0.00000139  | -0.771 |        | A1CF.ADCYAP1.AGEF  | 79  |
| 285 | Cancer,Organismal Injury and Abnormalities,Renal and Urological Disease               | Bleat cancer                                | 0.00000142  |        |        | AGER.AHNAK2.AJUB   | 185 |
| 286 | Cardiovascular Disease,Hepatic System Disease,Organismal Injury and Abnorma           | Hepatocellular carcinoma                    | 0.00000147  | 2.123  |        | ABC811.ACSM3.ADA   | 144 |
| 287 | ystem Disorders,Gastrointestinal Disease,Metabolic Disease,Organismal Injury and A    | Diabetes mellitus                           | 0.00000153  | 0.339  |        | A1CF.ACS1.ACSM3.J  | 198 |
| 288 | Cardiovascular Disease,Organismal Injury and Abnormalities                            | Atherosclerosis                             | 0.00000155  | -0.747 |        | AGER.ANGPTL3.APOF  | 85  |
| 289 | Cellular Movement,Immune Cell Trafficking                                             | Leukocyte migration                         | 0.00000156  | -1.555 |        | A1CF.ADCYAP1.ADJ   | 163 |
| 290 | Tissue Development                                                                    | Development of epithelial tissue            | 0.00000164  | 0.63   |        | AGER.AGTR2.APOA1   | 97  |
| 291 | Organismal Injury and Abnormalities,Tissue Morphology                                 | Size of lesion                              | 0.00000167  |        |        | ADCYAP1.AGER       |     |

|     |                                                                                      |                                                   |           |        |                     |     |
|-----|--------------------------------------------------------------------------------------|---------------------------------------------------|-----------|--------|---------------------|-----|
| 303 | Hair and Skin Development and Function,Organ Development,Organismal Development      | Formation of epidermis                            | 0.0000231 | -1.054 | APCCD1,ENC1,CDH1,   | 36  |
| 304 | Cancer,Organismal Injury and Abnormalities                                           | Metastasis of carcinoma                           | 0.0000232 | -1.254 | ADCCY,ADCYAP1,AGEF  | 39  |
| 305 | System Development and Function,Lymphoid Tissue Structure and Development,Tissu      | Head and neck squamous cell carcinoma             | 0.0000241 |        | ABCDC3,ABCO,ADAM28, | 329 |
| 306 | Lipid Metabolism,Molecular Transport,Small Molecule Biochemistry                     | Morphology of lipid                               | 0.0000246 | 0.156  | ABCBD1,ADH1C,ALDH,  | 14  |
| 307 | Cellular Assembly and Organization,Cellular Assembly and Organization,Cellular Ass   | Cleavage of lipid                                 | 0.0000248 | 0.295  | ADCCYAP1,AGEF,AGEF, | 19  |
| 308 | nd Function,Gastrointestinal Disease,Organ Morphology,Organismal Development,Org     | Abnormal morphology of stomach                    | 0.0000318 |        | AGR2,IRCE1,CAM,CA,  | 10  |
| 309 | System Development and Function,Hepatic System Disease,Inflammatory Disease,Inf      | Cell motility of myoid cells                      | 0.0000361 | -1.119 | ABCBD1,APCA1,APCA,  | 64  |
| 310 | Lipid Metabolism,Molecular Transport,Small Molecule Biochemistry                     | Inflammation of stromal                           | 0.0000361 | 0.932  | ABCBD1,ADCVY1,AN,   | 60  |
| 311 | ular Growth and Proliferation,Hair and Skin Development,Organ Development            | Proliferation of dermal cells                     | 0.0000441 | 1.424  | AGTR2,AREG,CASR,C,  | 45  |
| 312 | Lipid Metabolism,Molecular Transport,Small Molecule Biochemistry                     | Concentration of cholesterol                      | 0.0000376 | 1.009  | ABCBD1,ADCVY1,AN,   | 58  |
| 313 | Hair and Skin Development and Function,Organ Morphology,Organismal Developme         | Growth of hair                                    | 0.0000376 | 1.148  | AGTR2,AREG,CASR,C,  | 45  |
| 314 | Cell Signaling,Molecular Transport,Vitamin and Mineral Metabolism                    | Quantity of Ca <sup>2+</sup>                      | 0.0000376 | -0.216 | ADCVY1,APCC3,AGEF,  | 72  |
| 315 | Cellular Assembly and Organization,Cellular Assembly and Organization,Cellular Ass   | Formation of plasma membrane                      | 0.0000383 |        | BCAN,BRRB,BLH,CA,   | 68  |
| 316 | tion,Connective Tissue Development and Function,Hair and Skin Development and F      | Proliferation of keratinocytes                    | 0.0000397 | -1.421 | AGTR2,AREG,CASR,C,  | 35  |
| 317 | Hair and Skin Development and Function,Organ Development,Organismal Developm         | Formation of skin                                 | 0.0000405 | 0.433  | AGTR2,ADCCY1,AGEF,  | 73  |
| 318 | Metabolic Disease,Organismal Injury and Abnormalities                                | Glucose metabolism disorder                       | 0.0000408 | 0.3    | ACE2,ACSL1,ACMS3,   | 231 |
| 319 | ndocrine System Disorders,Organismal Injury and Abnormalities,Reproductive System    | Early stage senescence                            | 0.0000447 |        | ABCBD1,APCA1,APCA,  | 64  |
| 320 | Neurological Disease,Skeletal and Muscular Disorders                                 | Neurovascular disease                             | 0.0000424 | 0.379  | ADCVY1,AGEF,APCC,   | 74  |
| 321 | ndocrine System Disorders,Organismal Injury and Abnormalities,Reproductive System    | Grade 3 primary serous ovarian carcinoma          | 0.0000441 |        | CELSR3,MSLN,MUC1,   | 6   |
| 322 | Respiratory Disease,Respiratory System Development and Function                      | Abnormal morphology of respiratory system         | 0.0000459 |        | ALDH1A1,ALDH3A1,A,  | 55  |
| 323 | Conditions,Immunological Disease,Inflammatory Disease,Inflammatory Response,Orga     | Abscess dermatitis                                | 0.0000482 |        | AGTR2,AREG,CASR,C,  | 37  |
| 324 | ular Growth and Proliferation,Hair and Skin Development and Function,Organ Develop   | Proliferation of epidermal cells                  | 0.0000479 | -1.577 | ABCBD1,ADCVY1,AN,   | 58  |
| 325 | Cancer,Hematological Disease,Organismal Injury and Abnormalities                     | Malignant myeloid neoplasm                        | 0.0000482 | 0.059  | A1CF,ABCBD1,ABCC3,  | 258 |
| 326 | Organismal Injury and Abnormalities                                                  | Morphology of head                                | 0.0000506 |        | ADCVY1,AGEF,CASR,   | 165 |
| 327 | Cancer,Organismal Injury and Abnormalities,Renal and Urological Disease              | Bladder tumor                                     | 0.0000506 |        | ADCVY1,AGEF,CASR,   | 165 |
| 328 | Organismal Injury and Abnormalities                                                  | Visceromegaly                                     | 0.0000548 | -1.045 | CAV1,CD25B,CXCL6,   | 26  |
| 329 | ular Development,Embryonic Development,Organ Development,Tissue Developm             | Migration of hepatoma cell lines                  | 0.0000537 | 2.135  | ALB,ABCC2,AMP,BF,   | 55  |
| 330 | Development and Function,Lymphoid Tissue Structure and Development,Organ Morpho      | Morphology of lymphoid organ                      | 0.000054  |        | ARHGDB,ARHGFE,A,    | 86  |
| 331 | Lipid Metabolism,Small Molecule Biochemistry,Vitamin and Mineral Metabolism          | Steroid metabolism                                | 0.0000554 | 1.351  | ADCVY1,AGEF,AGEF,   | 51  |
| 332 | Cardiovascular System Development and Function,Cellular Movement                     | Migration of endothelial cells                    | 0.0000556 | 0.703  | ADCVY1,AGEF,AGEF,   | 51  |
| 333 | on,Organ Morphology,Organismal Development,Skeletal and Muscular System Devel        | Morphology of rib                                 | 0.0000584 |        | BMP4,CDX1,CDX2,CR,  | 19  |
| 334 | Cellular Development,Connective Tissue Development and Function,Connective Tis       | Stabilization of cellular junctions               | 0.0000625 | -0.518 | ALB,ABCC2,AMP,BF,   | 55  |
| 335 | Cellular Development,Connective Tissue Development and Function,Connective Tis       | Differentiation of connective tissue cells        | 0.0000625 | 1.408  | AGER,AREG,ASXL2,A,  | 110 |
| 336 | Cellular Development,Connective Tissue Development and Function,Connective Tis       | Uterine endometriosis                             | 0.0000666 |        | ALB,ABCC2,AMP,BF,   | 55  |
| 337 | Cell-Cell Signaling and Interaction,Cellular Assembly and Organization               | Formation of intercellular junctions              | 0.0000666 | 0.46   | ALB,ABCC2,AMP,BF,   | 55  |
| 338 | ndocrine System Disorders,Organismal Injury and Abnormalities,Reproductive System    | Benign prostatic carcinoma                        | 0.0000701 |        | ABCBD1,APCA1,APCA,  | 64  |
| 339 | Cancer,Hematological Disease,Organismal Injury and Abnormalities                     | Bone marrow cancer                                | 0.0000701 | 0.864  | A1CF,ABCBD1,ABCC3,  | 259 |
| 340 | Hematological Disease,Organismal Injury and Abnormalities,Psychological Dis          | Quantity of granules                              | 0.0000711 | -0.958 | ADCVY1,AGEF,CASR,   | 165 |
| 341 | urological Disease,Lymphoid Tissue Structure and Development,Organ Morphology,C      | Abnormal morphology of lymphoid organ             | 0.0000711 |        | ARHGDB,ARHGFE,A,    | 72  |
| 342 | Organismal Injury and Abnormalities                                                  | Morphology of lymphoid                            | 0.0000749 |        | ACE2,ACTG2,AGEF,    | 147 |
| 343 | etabolism,Molecular Transport,Small Molecule Biochemistry,Vitamin and Mineral Me     | Quantity of retinoid                              | 0.0000749 | -0.618 | ADH1C,ALDH1A1,APC,  | 12  |
| 344 | Cancer,Organismal Injury and Abnormalities                                           | Liquid tumor                                      | 0.0000759 | 0.376  | A1CF,ABCBD1,ABCC3,  | 260 |
| 345 | Metabolic Disease,Organismal Injury and Abnormalities                                | Assembly of fibrous protein                       | 0.0000793 |        | AGR2,AP1M2,CFTR,C,  | 13  |
| 346 | gnaling and Interaction,Cellular Assembly and Organization,Cellular Function and N   | Function of gastrointestinal tract                | 0.0000808 | 0.444  | ADCVY1,AGEF,CASR,   | 165 |
| 347 | ndocrine System Disorders,Organismal Injury and Abnormalities,Reproductive System    | Atopic disease                                    | 0.0000808 | -0.152 | AKR1B,BCCL2,CAC1,   | 51  |
| 348 | Cancer,Organismal Injury and Abnormalities                                           | Upper aerodigestive carcinoma                     | 0.0000841 |        | ABCBD1,APCA1,APCA,  | 64  |
| 349 | Gastrointestinal Disease,Hepatic System Disease                                      | Cholelithiasis                                    | 0.0000841 |        | ABCBD1,APCA1,APCA,  | 64  |
| 350 | Cancer,Neurological Disease,Organismal Injury and Abnormalities                      | Nervous system neoplasm                           | 0.0000887 | 0.538  | AGER,AMP,APCA1,A,   | 100 |
| 351 | Neurological Disease,Organismal Injury and Abnormalities,Psychological Disorders     | Degenerative dementia                             | 0.0000887 |        | ADCVY1,AGEF,CASR,   | 165 |
| 352 | Cancer,Organismal Injury and Abnormalities,Reproductive System Disease               | Breast carcinoma                                  | 0.0000927 | 0.423  | ABLIM1,ABDO,ADM28,  | 241 |
| 353 | ndocrine System Disorders,Organismal Injury and Abnormalities,Reproductive System    | Ductal in situ carcinoma                          | 0.0000942 | 0.813  | AGER,AGR2,AMP,BF,   | 73  |
| 354 | Cancer,Organismal Injury and Abnormalities                                           | Neoplasia of tumor cell lines                     | 0.0000942 | 0.522  | ABLIM1,ALDH1A3,ARE, | 74  |
| 355 | Gastrointestinal Disease,Organismal Injury and Abnormalities                         | Abnormality of small intestine                    | 0.0000984 |        | AGR2,AP1M2,AREG,C,  | 29  |
| 356 | atological Diseases and Conditions,Organ Morphology,Organismal Injury and Abnorm     | Recess of skin                                    | 0.000108  |        | CTSE,CDX1,CBR1,     | 30  |
| 357 | Cancer,Hematological Disease,Organismal Injury and Abnormalities                     | Myeloid neoplasm                                  | 0.0001092 | 0.128  | A1CF,ABCBD1,ABCC3,  | 260 |
| 358 | atological Diseases and Conditions,Organ Morphology,Organismal Injury and Abnorm     | Abnormal morphology of epidermis                  | 0.0001092 |        | AREG,CASR,C,AGEF,   | 87  |
| 359 | Cancer,Gastrointestinal Disease,Organismal Injury and Abnormalities                  | Gastroesophageal adenocarcinoma                   | 0.000105  |        | ADAM28,ADANK1,ADC,  | 233 |
| 360 | Cancer,Organismal Injury and Abnormalities                                           | Growth of tumor                                   | 0.000107  | 0.084  | ADAM28,AFP,FL,      | 12  |
| 361 | ic Disease,Neurological Disease,Organismal Injury and Abnormalities,Psychological D  | Transport of ion                                  | 0.000107  | 1.654  | AGER,AMP,APCA1,A,   | 89  |
| 362 | Cancer                                                                               | Alzheimer disease                                 | 0.00011   |        | AGER,AMP,APCA1,A,   | 89  |
| 363 | Cancer                                                                               | Hyperplasia of tissue                             | 0.00011   | -1.739 | AGR2,C3,CAP,CAV1,   | 39  |
| 364 | Respiratory System Development and Function                                          | Morphology of respiratory system                  | 0.000112  |        | ABCBD1,APCA1,APCA,  | 64  |
| 365 | Organismal Injury and Abnormalities,Renal and Urological Disease                     | Renal lesion                                      | 0.000112  | 0.116  | ADCVY1,AGEF,CASR,   | 165 |
| 366 | Neurological Disease,Organismal Injury and Abnormalities,Psychological Disorders     | Alzheimer disease or frontotemporal dementia      | 0.000118  | -0.115 | ABCBD1,APCA1,APCA,  | 64  |
| 367 | ndocrine System Disorders,Gastrointestinal Disease,Organismal Injury and Abnorm      | Paraneoplastic cerebellar degeneration            | 0.000119  |        | ADAM28,ADANK1,AH,   | 304 |
| 368 | Cancer,Organismal Injury and Abnormalities                                           | Malignant neoplasm of aerodigestive tract         | 0.000121  | 0.961  | ABCBD1,APCA1,APCA,  | 64  |
| 369 | Cancer                                                                               | Synthesis of carbohydrate                         | 0.000124  |        | BMP4,CDX1,CDX2,CR,  | 25  |
| 370 | ctive Tissue Disorders,Organismal Injury and Abnormalities,Skeletal and Muscular Dis | Abnormality of rib cage                           | 0.000124  | 0.39   | ADCVY1,AGEF,AGEF,   | 51  |
| 371 | Embryonic Development,Organismal Development                                         | Corneal and soft tissue tumor                     | 0.000135  | 1.682  | ADCVY1,AGEF,AGEF,   | 51  |
| 372 | ndocrine System Disorders,Organismal Injury and Abnormalities,Reproductive System    | Development of head                               | 0.000136  |        | ADCVY1,AGEF,AGEF,   | 51  |
| 373 | nd Function,Gastrointestinal Disease,Organ Morphology,Organismal Development,Org     | Abnormal morphology of duodenum                   | 0.000136  |        | AP1M2,CFTR,FGA,H,   | 8   |
| 374 | Neurological Disease,Organismal Injury and Abnormalities,Psychological Dis           | Uptake of lipid                                   | 0.000142  | 0.528  | ABCBD1,APCA1,APCA,  | 64  |
| 375 | Cancer,Organismal Injury and Abnormalities                                           | Chronic pharyngitis                               | 0.000144  | -0.841 | AGER,AMP,APCC3,     | 40  |
| 376 | Cell-Cell Signaling and Interaction                                                  | Activation of connective tissue cells             | 0.000145  | 1.454  | AGER,AMP,BCL2,IT,   | 32  |
| 377 | Developmental Disorder,Organismal Injury and Abnormalities                           | Congenital malformation of genitourinary system   | 0.000153  | -0.069 | ACSL1,AGTR2,ALDH1,  | 73  |
| 378 | Embryonic Development,Organismal Development                                         | Development of gonad                              | 0.000157  | -0.983 | ADCVY1,AGEF,CASR,   | 165 |
| 379 | etabolism,Molecular Transport,Small Molecule Biochemistry,Vitamin and Mineral Me     | Concentration of retinol                          | 0.000161  | 0.374  | AGER,AMP,APCC3,     | 40  |
| 380 | Cancer,Hematological Disease,Organismal Injury and Abnormalities                     | Bone marrow neoplasm                              | 0.000161  | 0.397  | A1CF,ABCBD1,ABCC3,  | 262 |
| 381 | ncer,Hematological Disease,Organismal Injury and Abnormalities,Psychological Dis     | Acute leukemia                                    | 0.000164  | -0.44  | ABCBD1,APCA1,APCA,  | 64  |
| 382 | Hair and Skin Development and Function,Organ Morphology                              | Morphology of hair                                | 0.000164  |        | AGR2,AREG,CASR,C,   | 45  |
| 383 | Organismal Injury and Abnormalities                                                  | Quantity of vitreous humor                        | 0.000168  | -0.582 | AGER,AMP,CBSCL2,    | 25  |
| 384 | ndocrine System Disorders,Gastrointestinal Disease,Organismal Injury and Abnorm      | Pancreatic adenocarcinoma                         | 0.000167  | 0.849  | ABCBD1,APCA1,APCA,  | 64  |
| 385 | Cancer,Organismal Injury and Abnormalities,Reproductive System Disease               | Endometrial hyperplasia                           | 0.000173  | 0.087  | ABCBD1,APCA1,APCA,  | 64  |
| 386 | Cancer,Organismal Injury and Abnormalities,Reproductive System Disease               | Invasion of tumor                                 | 0.000174  |        | AGER,AMP,APCC3,     | 40  |
| 387 | Cancer,Organismal Injury and Abnormalities,Reproductive System Disease               | Endometrial adenocarcinoma                        | 0.000174  |        | ABCBD1,APCA1,APCA,  | 64  |
| 388 | Cellular Development,Cellular Growth and Proliferation                               | Endometrial adenocarcinoma                        | 0.000188  | 0.816  | ABCBD1,APCA1,APCA,  | 64  |
| 389 | rganismal Development,Organismal Injury and Abnormalities,Skeletal and Muscu         | Abnormal morphology of rib                        | 0.000188  |        | BMP4,CDX1,CDX2,CR,  | 19  |
| 390 | Cellular Development,Connective Tissue Development and Function,Connective Tis       | Differentiation of myofibrils                     | 0.000189  | -0.984 | BMP4,EPF1,FBX7,     | 12  |
| 391 | Cardiovascular Disease,Organismal Injury and Abnormalities                           | Sliding of myofibrils                             | 0.000189  |        | ACTA1,ACTG2,ADP,A,  | 12  |
| 392 | Neurological Disease,Organismal Injury and Abnormalities,Psychological Disorders     | Pedicular scoliosis                               | 0.000199  | 0.216  | AGER,AMP,APCA1,A,   | 100 |
| 393 | Neurological Disease,Organismal Injury and Abnormalities,Psychological Disorders     | Taopathy                                          | 0.000199  |        | AGER,AMP,APCA1,A,   | 100 |
| 394 | Cancer,Organismal Injury and Abnormalities                                           | Abnormal morphology of spleen                     | 0.000206  | -0.721 | AFP11,AGR2,ALDH,    | 281 |
| 395 | Cancer,Organismal Injury and Abnormalities                                           | Lymphatic system tumor                            | 0.000206  |        | ABCBD1,APCA1,APCA,  | 64  |
| 396 | Gastrointestinal Disease,Organismal Injury and Abnormalities                         | Obstruction of small intestine                    | 0.000214  |        | ADCVY1,AGEF,CASR,   | 165 |
| 397 | Development and Function,Organ Development,Tissue Development                        | Development of cornea                             | 0.000214  | 0.039  | ALDH1A1,ALDH3A1,A,  | 14  |
| 398 | gnaling and Interaction,Cellular Assembly and Organization,Cellular Function and N   | Adhesion of small intestine                       | 0.000214  | 0.42   | CAV1,CDH1,CDH3,AG,  | 18  |
| 399 | Cancer,Gastrointestinal Disease,Organismal Injury and Abnormalities                  | Colorectal adenocarcinoma                         | 0.000218  |        | ABCBD1,APCA1,APCA,  | 64  |
| 400 | Conditions,Hair and Skin Development and Function,Organ Morphology,Organism          | Abnormal morphology of hair                       | 0.000218  |        | AREG,CBSCL2,CEL,    | 23  |
| 401 | Development and Function,Lymphoid Tissue Structure and Development,Organ Morpho      | Organization of extracellular matrix              | 0.000219  | 0      | ADAM28,ADANK1,ADC,  | 233 |
| 402 | Cellular Development,Cellular Growth and Proliferation                               | Transport of chorite                              | 0.000235  | 0.223  | AN010,AN04,AN07,A,  | 17  |
| 403 | ment,Organismal Injury and Abnormalities,Skeletal and Muscular Disorders,Skeletal    | Proliferation of pancreatic cancer cell lines     | 0.000239  | 1.895  | CDH17,CYAP1,AGEF,   | 51  |
| 404 | Cancer,Organismal Injury and Abnormalities                                           | Abnormal morphology of rib cage                   | 0.000242  |        | BMP4,CDX1,CDX2,CR,  | 21  |
| 405 | Cell-Cell Signaling and Interaction,Cellular Growth and Proliferation                | Stem cells                                        | 0.000255  | -1.008 | ADCVY1,AGEF,AGEF,   | 51  |
| 406 | Cellular Development,Cellular Growth and Proliferation                               | Transport of molecule                             | 0.000255  | 1.687  | A1CF,ABCBD1,ABCC3,  | 246 |
| 407 | Cancer,Gastrointestinal Disease,Organismal Injury and Abnormalities                  | Metastatic malignant neoplasm of digestive system | 0.000254  | -0.659 | AGTR2,APCC3,C3,CA,  | 48  |
| 408 | Organismal Injury and Abnormalities                                                  | Renal impairment                                  | 0.000254  | -0.659 | AGTR2,APCC3,C3,CA,  | 48  |
| 409 | Cellular Development,Cellular Growth and Proliferation                               | Organization of fibrous protein                   | 0.000264  | -1.176 | ABCBD1,APCA1,APCA,  | 64  |
| 410 | Lipid Metabolism,Molecular Transport,Small Molecule Biochemistry,Vitamin and Mineral | Neoplasia of fatty acid                           | 0.000268  | 0.771  | ACTN3,ADCVY,ADCVY,  | 114 |
| 411 | Cancer,Organismal Injury and Abnormalities                                           | Upper aero-digestive squamous cell carcinoma      | 0.000284  |        | ADAM28,ADANK1,AH,   | 235 |
| 412 | Digestive System Development and Function,Organismal Development                     | Morphology of mouth                               | 0.000289  |        | AGER,AMP,CIFTR,CR,  | 30  |
| 413 | Cancer,Gastrointestinal Disease,Organismal Injury and Abnormalities                  | Gastric carcinoma                                 | 0.000289  |        | CDX2,ADANK1,ADC,    | 233 |
| 414 | ases and Conditions,Immunological Disease,Inflammatory Disease,Organismal Injury     | Lichen planus                                     | 0.000289  |        | CALM3,BCL2,DDFEB,   | 21  |
| 415 | Gastrointestinal Disease,Organismal Injury and Abnormalities                         | Intrahepatic cholelithiasis                       | 0.000286  |        | ABCBD1,APCA1,APCA,  | 64  |
| 416 | Cancer,Neurological Disease,Organismal Injury and Abnormalities                      | Central nervous system tumor                      | 0.000286  | 0.339  | ABCBD1,APCA1,APCA,  | 64  |
| 417 | Development,Skeletal and Muscular Development,Organismal Development                 | Abnormal morphology of body wall                  | 0.000289  | 0.004  | BMP4,CDX1,CDX2,CR,  | 23  |
| 418 | Development,Skeletal and Muscular Development,Organismal Development                 | Abnormal morphology of body wall                  | 0.000289  |        | ACTL1,IRBP2,BMPR,C, | 14  |
| 419 | ndocrine System Disorders,Organismal Injury and Abnormalities,Reproductive System    | Stage I serous ovarian adenocarcinoma             | 0.000296  |        | CELSR3,MSLN,MUC1,   | 7   |
| 420 | Cancer,Organismal Injury and Abnormalities,Renal and Urological Disease              | Organismal Injury and Abnormalities               | 0.000303  |        | BCAN,BHRB,CAV1,     | 44  |
| 421 | Cancer,Organismal Injury and Abnormalities                                           | Bladder carcinoma                                 | 0.000303  | 0.331  | ADCVY1,AGEF,CASR,   | 165 |
| 422 | Cancer,Organ Morphology                                                              | Morphology of epidermis                           | 0.000317  |        | AFP11,ALDH1A1,AL,   | 36  |
| 423 | Cancer,Organismal Injury and Abnormalities                                           | Invasion of tissue                                | 0.000322  | -0.586 | ANKK3,CAV1,CD36,CD, | 53  |
| 424 | Cancer,Gastrointestinal Disease,Organismal Injury and Abnormalities                  | Advanced colorectal cancer                        | 0.000324  | 0.169  | BCN1,ACAF1,FRZB,    | 15  |
| 425 | Cellular Assembly and Organization,Cellular Growth and Proliferation                 | Survival of organism                              | 0.000324  | -0.686 | ABCBD1,APCA1,APCA,  | 64  |
| 426 | Lipid Metabolism,Small Molecule Biochemistry                                         | Recruitment of lipid                              | 0.000324  | 1.854  | ABCBD1,APCA1,APCA,  | 64  |
| 427 | Cellular Assembly and Organization,Cellular Assembly and Organization,Cellular Ass   | Conversion of embryonic cells                     | 0.000324  | -2.431 | BMP4,DMBT1,FDX,NM,  | 4   |
| 428 | Dermatological Disease,Organismal Injury and Abnormalities                           | Lesion of hair                                    | 0.000329  |        | ABCBD1,APCA1,APCA,  | 64  |
| 429 | Cancer,Neurological Disease,Organismal Injury and Abnormalities                      | Central nervous system solid tumor                | 0.000329  | 0.339  | ABCBD1,APCA1,APCA,  | 64  |
| 430 | Cancer,Gastrointestinal Disease,Organismal Injury and Abnormalities                  | Metastatic colorectal cancer                      | 0.000331  |        | ABCBD1,APCA1,APCA,  | 64  |
| 431 | Cancer,Organismal Injury and Abnormalities                                           | Atherosclerotic lesion                            | 0.000353  | -1.537 | APCA1,APCA,APCA4,   | 34  |
| 432 | Cancer,Organismal Injury and Abnormalities                                           | Remodeling of bone                                | 0.000358  | -0.354 | BCL2L1,CAV1,CD49,   | 39  |
| 433 | Cancer,Organismal Injury and Abnormalities                                           | Fibrosis                                          | 0.000362  | 1.412  | ADH2,ACSL1,ACTA1,A, | 101 |
| 434 | Lipid Metabol                                                                        |                                                   |           |        |                     |     |

**Table S3 (Related to Figure4). Gene enrichment sets for control vs *BRCA1<sup>mut</sup>* -FTE organoids at 1 year culture**

| NAME         | SIZE | ES         | NES       | NOM p-val   | FDR q-val   | FWER p-val | RANK AT MAX | LEADING EDGE                    |
|--------------|------|------------|-----------|-------------|-------------|------------|-------------|---------------------------------|
| GNF2_EIF3S6  | 120  | 0.6727409  | 2.8466096 | 0           | 0           | 0          | 5273        | tags=82%, list=27%, signal=111% |
| MORF_ACTG1   | 138  | 0.6190265  | 2.7050114 | 0           | 0           | 0          | 6618        | tags=83%, list=34%, signal=125% |
| MORF_TPT1    | 102  | 0.6477453  | 2.6736124 | 0           | 0           | 0          | 5716        | tags=81%, list=29%, signal=115% |
| MORF_NPM1    | 162  | 0.6042291  | 2.647897  | 0           | 0           | 0          | 6649        | tags=83%, list=34%, signal=125% |
| GCM_TPT1     | 69   | 0.6866267  | 2.6212063 | 0           | 0           | 0          | 4785        | tags=86%, list=25%, signal=113% |
| GCM_NPM1     | 115  | 0.61789876 | 2.5851052 | 0           | 0           | 0          | 6596        | tags=86%, list=34%, signal=129% |
| GNF2_ST13    | 64   | 0.6888458  | 2.5632267 | 0           | 0           | 0          | 5273        | tags=84%, list=27%, signal=115% |
| GNF2_TPT1    | 38   | 0.73548156 | 2.5450826 | 0           | 0           | 0          | 4761        | tags=95%, list=24%, signal=125% |
| MORF_NME2    | 154  | 0.5721919  | 2.5130274 | 0           | 0           | 0          | 6659        | tags=77%, list=34%, signal=115% |
| GNF2_MMP1    | 32   | 0.7303712  | 2.4124823 | 0           | 0           | 0          | 1928        | tags=59%, list=10%, signal=66%  |
| MODULE_312   | 45   | 0.68017954 | 2.389409  | 0           | 0           | 0          | 2563        | tags=40%, list=13%, signal=46%  |
| MODULE_83    | 316  | 0.49353978 | 2.3648179 | 0           | 0           | 0          | 6709        | tags=68%, list=34%, signal=102% |
| GCM_PSME1    | 84   | 0.5871864  | 2.352315  | 0           | 0           | 0          | 6830        | tags=75%, list=35%, signal=115% |
| MODULE_254   | 54   | 0.629287   | 2.3378637 | 0           | 0           | 0          | 2563        | tags=39%, list=13%, signal=45%  |
| MORF_RAN     | 266  | 0.49931005 | 2.332909  | 0           | 0           | 0          | 8072        | tags=77%, list=41%, signal=129% |
| MORF_FBL     | 138  | 0.5317876  | 2.3047824 | 0           | 0           | 0          | 8072        | tags=82%, list=41%, signal=139% |
| GCM_CSNK2B   | 98   | 0.56095266 | 2.303643  | 0           | 0           | 0          | 7609        | tags=81%, list=39%, signal=132% |
| MODULE_357   | 76   | 0.5848927  | 2.2981043 | 0           | 0           | 0          | 1789        | tags=37%, list=9%, signal=40%   |
| GNF2_FBL     | 145  | 0.52505355 | 2.2934113 | 0           | 0           | 0          | 5833        | tags=61%, list=30%, signal=87%  |
| MODULE_29    | 27   | 0.7299376  | 2.2928236 | 0           | 0           | 0          | 4785        | tags=93%, list=25%, signal=123% |
| MORF_UBE2I   | 238  | 0.49950063 | 2.2902822 | 0           | 0           | 0          | 7819        | tags=71%, list=40%, signal=117% |
| MODULE_154   | 71   | 0.5919356  | 2.2594893 | 0           | 8.69E-05    | 0.001      | 1789        | tags=37%, list=9%, signal=40%   |
| GNF2_DAP3    | 118  | 0.5474657  | 2.259309  | 0           | 8.32E-05    | 0.001      | 6928        | tags=72%, list=36%, signal=111% |
| MODULE_297   | 76   | 0.58601916 | 2.2580717 | 0           | 7.97E-05    | 0.001      | 1789        | tags=37%, list=9%, signal=40%   |
| MORF_ANP32B  | 197  | 0.49914193 | 2.2527962 | 0           | 7.65E-05    | 0.001      | 7939        | tags=75%, list=41%, signal=125% |
| GCM_APEX1    | 113  | 0.5416784  | 2.2478492 | 0           | 7.36E-05    | 0.001      | 6935        | tags=73%, list=36%, signal=113% |
| GNF2_GLTSCR2 | 31   | 0.6947166  | 2.234576  | 0           | 1.40E-04    | 0.002      | 4785        | tags=94%, list=25%, signal=124% |
| GNF2_SPRR1B  | 21   | 0.75724036 | 2.2250254 | 0           | 1.35E-04    | 0.002      | 1541        | tags=57%, list=8%, signal=62%   |
| GCM_ACTG1    | 123  | 0.5223154  | 2.2139533 | 0           | 1.87E-04    | 0.003      | 7113        | tags=72%, list=37%, signal=112% |
| MORF_ERH     | 114  | 0.52058136 | 2.2041113 | 0           | 1.81E-04    | 0.003      | 7947        | tags=81%, list=41%, signal=135% |
| MORF_EIF3S6  | 122  | 0.5279552  | 2.200043  | 0           | 1.75E-04    | 0.003      | 7947        | tags=80%, list=41%, signal=135% |
| MODULE_298   | 19   | 0.7568386  | 2.1905832 | 0           | 1.69E-04    | 0.003      | 596         | tags=42%, list=3%, signal=43%   |
| MORF_JUND    | 64   | 0.5846139  | 2.18988   | 0           | 1.64E-04    | 0.003      | 5647        | tags=72%, list=29%, signal=101% |
| MODULE_68    | 19   | 0.75790423 | 2.1639967 | 0           | 1.60E-04    | 0.003      | 596         | tags=42%, list=3%, signal=43%   |
| MORF_G22P1   | 171  | 0.48629752 | 2.160848  | 0           | 1.55E-04    | 0.003      | 7947        | tags=72%, list=41%, signal=120% |
| MODULE_73    | 19   | 0.7453506  | 2.1528246 | 0           | 1.51E-04    | 0.003      | 560         | tags=53%, list=3%, signal=54%   |
| GNF2_CKS2    | 50   | 0.59455144 | 2.1213331 | 0           | 1.47E-04    | 0.003      | 4890        | tags=58%, list=25%, signal=77%  |
| MORF_EIF4A2  | 138  | 0.49196252 | 2.100293  | 0           | 2.38E-04    | 0.005      | 6830        | tags=64%, list=35%, signal=99%  |
| MODULE_114   | 332  | 0.4412614  | 2.099389  | 0           | 2.32E-04    | 0.005      | 6614        | tags=64%, list=34%, signal=96%  |
| GNF2_CDC20   | 56   | 0.569282   | 2.09359   | 0           | 2.26E-04    | 0.005      | 5387        | tags=63%, list=28%, signal=86%  |
| MODULE_151   | 311  | 0.43870503 | 2.0863914 | 0           | 3.06E-04    | 0.007      | 6614        | tags=65%, list=34%, signal=96%  |
| MODULE_32    | 237  | 0.45042282 | 2.0774214 | 0           | 5.56E-04    | 0.013      | 7049        | tags=65%, list=36%, signal=100% |
| MODULE_153   | 32   | 0.6424479  | 2.0701852 | 0           | 5.84E-04    | 0.014      | 727         | tags=34%, list=4%, signal=36%   |
| MORF_EIF3S2  | 243  | 0.44350612 | 2.0691514 | 0           | 5.71E-04    | 0.014      | 7819        | tags=64%, list=40%, signal=105% |
| GNF2_CCNA2   | 68   | 0.5379757  | 2.0674078 | 0           | 5.58E-04    | 0.014      | 5387        | tags=57%, list=28%, signal=79%  |
| GNF2_RAN     | 85   | 0.51783055 | 2.0476763 | 0           | 6.27E-04    | 0.016      | 7423        | tags=71%, list=38%, signal=114% |
| MODULE_552   | 16   | 0.7388666  | 2.041278  | 0           | 6.91E-04    | 0.017      | 2623        | tags=69%, list=13%, signal=79%  |
| GCM_PFN1     | 51   | 0.5614346  | 2.027505  | 0           | 7.47E-04    | 0.019      | 6657        | tags=69%, list=34%, signal=104% |
| MODULE_537   | 17   | 0.72189254 | 2.0227401 | 0.002304148 | 7.32E-04    | 0.019      | 1687        | tags=41%, list=9%, signal=45%   |
| MORF_CSNK2B  | 285  | 0.4247475  | 1.9933726 | 0           | 0.001108753 | 0.03       | 8124        | tags=65%, list=42%, signal=110% |
| GNF2_PTX3    | 36   | 0.60176075 | 1.990988  | 0.002604167 | 0.001154729 | 0.032      | 3290        | tags=50%, list=17%, signal=60%  |
| GNF2_HMMR    | 47   | 0.5508787  | 1.9842057 | 0           | 0.001268832 | 0.036      | 5387        | tags=62%, list=28%, signal=85%  |
| GCM_PPP1CC   | 56   | 0.5361963  | 1.9795676 | 0           | 0.001517148 | 0.044      | 7609        | tags=70%, list=39%, signal=114% |
| GNF2_CNBR2   | 57   | 0.5345916  | 1.9762547 | 0           | 0.001523605 | 0.045      | 5387        | tags=58%, list=28%, signal=80%  |

**Table S4 (Related to Figure4). Functional annotation for control vs BRCA1<sup>mut</sup>-FTE organoids at 1 year by IPA software**

| Rank | Category                                                                                        | Diseases or Functions Annotation                    | p-value    | Z-score | Gene List              | # Molecules |
|------|-------------------------------------------------------------------------------------------------|-----------------------------------------------------|------------|---------|------------------------|-------------|
| 1    | Cancer,Organismal Injury and Abnormalities                                                      | Non-melanoma solid tumor                            | 4.47E-44   | 1.922   | AAAS,AATK,ABCBA,ABC    | 1023        |
| 2    | Cancer,Organismal Injury and Abnormalities                                                      | Nonhematologic malignant neoplasm                   | 9.97E-44   | 1.865   | AAAS,AATK,ABCBA,ABC    | 1020        |
| 3    | Cancer,Organismal Injury and Abnormalities                                                      | Tumorigenesis of tissue                             | 1.2E-43    | 2.413   | AAAS,AATK,ABCBA,ABC    | 1014        |
| 4    | Cancer,Organismal Injury and Abnormalities                                                      | Non-melanoma solid tumor                            | 1.1E-42    | 2.787   | AAAS,AATK,ABCBA,ABC    | 1015        |
| 5    | Cancer,Organismal Injury and Abnormalities                                                      | Cancer of secretory structure                       | 1.25E-42   | 0.223   | AAAS,AATK,ABCBA,ABC    | 898         |
| 6    | Cancer,Organismal Injury and Abnormalities                                                      | Epithelial neoplasm                                 | 3.1E-42    | 2.892   | AAAS,AATK,ABCBA,ABC    | 1009        |
| 7    | Cancer,Endocrine System Disorders,Organismal Injury and Abnormalities                           | Thyroid carcinoma                                   | 3.4E-42    |         | AAAS,AATK,ABCBA,ABC    | 832         |
| 8    | Cancer,Endocrine System Disorders,Organismal Injury and Abnormalities                           | Thyroid carcinoma                                   | 3.8E-42    | 1.914   | AAAS,AATK,ABCBA,ABC    | 1007        |
| 9    | Cancer,Endocrine System Disorders,Organismal Injury and Abnormalities                           | Endocrine carcinoma                                 | 9.28E-42   |         | AAAS,AATK,ABCBA,ABC    | 836         |
| 10   | Cancer,Endocrine System Disorders,Organismal Injury and Abnormalities                           | Endocrine carcinoma                                 | 9.87E-42   |         | AAAS,AATK,ABCBA,ABC    | 834         |
| 11   | Cancer,Endocrine System Disorders,Organismal Injury and Abnormalities                           | Endocrine carcinoma                                 | 9.23E-41   |         | AAAS,AATK,ABCBA,ABC    | 836         |
| 12   | Cancer,Endocrine System Disorders,Organismal Injury and Abnormalities                           | Neoplasia of endocrine tumor                        | 1.59E-40   |         | AAAS,AATK,ABCBA,ABC    | 834         |
| 13   | Cancer,Endocrine System Disorders,Organismal Injury and Abnormalities                           | Neck neoplasm                                       | 2.44E-40   | 1.897   | AAAS,AATK,ABCBA,ABC    | 838         |
| 14   | Cancer,Endocrine System Disorders,Organismal Injury and Abnormalities                           | Head and neck carcinoma                             | 4.49E-40   |         | AAAS,AATK,ABCBA,ABC    | 858         |
| 15   | Cancer,Organismal Injury and Abnormalities                                                      | Head and neck cancer                                | 1.73E-39   | 2.784   | AAAS,AATK,ABCBA,ABC    | 860         |
| 16   | Cancer,Organismal Injury and Abnormalities                                                      | Extragenital solid tumor                            | 6.39E-39   | 2.026   | AAAS,AATK,ABCBA,ABC    | 1026        |
| 17   | Cancer,Organismal Injury and Abnormalities                                                      | Malignant solid tumor                               | 1.17E-38   | 1.182   | AAAS,AATK,ABCBA,ABC    | 1026        |
| 18   | Cancer,Organismal Injury and Abnormalities                                                      | Cancer                                              | 4.64E-38   | 0.85    | AAAS,AATK,ABCBA,ABC    | 1029        |
| 19   | Cancer,Organismal Injury and Abnormalities                                                      | Solid tumor                                         | 6.83E-38   | 1.868   | AAAS,AATK,ABCBA,ABC    | 1029        |
| 20   | Cancer,Organismal Injury and Abnormalities                                                      | Head and neck tumor                                 | 1.35E-37   | 3.063   | AAAS,AATK,ABCBA,ABC    | 862         |
| 21   | Cancer,Organismal Injury and Abnormalities                                                      | Abdominal carcinoma                                 | 3.07E-36   | 2.209   | AAAS,AATK,ABCBA,ABC    | 933         |
| 22   | Cancer,Organismal Injury and Abnormalities                                                      | Abdominal adenocarcinoma                            | 2.32E-33   |         | AAAS,AATK,ABCBA,ABC    | 885         |
| 23   | Cancer,Organismal Injury and Abnormalities                                                      | Adenocarcinoma                                      | 2.44E-33   | 0.622   | AAAS,AATK,ABCBA,ABC    | 897         |
| 24   | Cancer,Organismal Injury and Abnormalities                                                      | Abdominal cancer                                    | 4.6E-32    | 0.253   | AAAS,AATK,ABCBA,ABC    | 946         |
| 25   | Cancer,Organismal Injury and Abnormalities                                                      | Abdominal neoplasm                                  | 7.24E-32   | 1.959   | AAAS,AATK,ABCBA,ABC    | 955         |
| 26   | Cancer,Organismal Injury and Abnormalities                                                      | Large intestine adenocarcinoma                      | 4.37E-29   |         | AAAS,AATK,ABCBA,ABC    | 778         |
| 27   | Cancer,Organismal Injury and Abnormalities                                                      | Digestive system cancer                             | 7.54E-29   | 1.006   | AAAS,AATK,ABCBA,ABC    | 894         |
| 28   | Cancer,Organismal Injury and Abnormalities                                                      | Digestive organ tumor                               | 2.68E-27   | 1.084   | AAAS,AATK,ABCBA,ABC    | 736         |
| 29   | Cancer,Organismal Injury and Abnormalities                                                      | Gastrointestinal adenocarcinoma                     | 5.95E-27   |         | AAAS,AATK,ABCBA,ABC    | 786         |
| 30   | Cancer,Organismal Injury and Abnormalities                                                      | Gastrointestinal adenocarcinoma                     | 3.34E-25   | 1.119   | AAAS,AATK,ABCBA,ABC    | 801         |
| 31   | Cancer,Organismal Injury and Abnormalities                                                      | Large intestine neoplasm                            | 0.49E-23   |         | AAAS,AATK,ABCBA,ABC    | 891         |
| 32   | Cancer,Organismal Injury and Abnormalities                                                      | Malignant neoplasm of large intestine               | 1.2E-22    | -0.478  | AAAS,AATK,ABCBA,ABC    | 791         |
| 33   | Cancer,Organismal Injury and Abnormalities                                                      | Gastrointestinal tumor                              | 3.32E-21   | 0.806   | AAAS,AATK,ABCBA,ABC    | 817         |
| 34   | Cancer,Organismal Injury and Abnormalities                                                      | Gastrointestinal tract cancer                       | 7.5E-21    | -0.161  | AAAS,AATK,ABCBA,ABC    | 871         |
| 35   | Cancer,Organismal Injury and Abnormalities                                                      | Frequency of tumor                                  | 7.44E-21   | 3.807   | AAAS,AATK,ABCBA,ABC    | 694         |
| 36   | Cancer,Organismal Injury and Abnormalities                                                      | Tumorigenesis of epithelial neoplasm                | 1.9E-20    | 3.880   | AAAS,AATK,ABCBA,ABC    | 905         |
| 37   | Cancer,Organismal Injury and Abnormalities                                                      | Development of carcinoma                            | 5.07E-20   | 2.706   | AAAS,AATK,ABCBA,ABC    | 675         |
| 38   | Cancer,Organismal Injury and Abnormalities                                                      | Development of malignant tumor                      | 8.04E-20   | 3.033   | AAAS,AATK,ABCBA,ABC    | 681         |
| 39   | Cancer,Organismal Injury and Abnormalities                                                      | Incidence of tumor                                  | 3.03E-19   | 3.033   | AAAS,AATK,ABCBA,ABC    | 681         |
| 40   | Cancer,Organismal Injury and Abnormalities                                                      | Genitourinary tumor                                 | 1.12E-15   | 1.258   | AAAS,AATK,ABCBA,ABC    | 675         |
| 41   | Cancer,Organismal Injury and Abnormalities                                                      | Endometrioid carcinoma                              | 3.3E-15    |         | AAAS,ABCBA,ABC81,AB    | 318         |
| 42   | Cancer,Organismal Injury and Abnormalities                                                      | Pelvic adenocarcinoma                               | 3.61E-15   |         | AAAS,ABCBA,ABC81,AB    | 409         |
| 43   | Cancer,Organismal Injury and Abnormalities                                                      | Colorectal adenocarcinoma                           | 3.73E-15   |         | AAAS,AATK,ABCBA,ABC    | 425         |
| 44   | Cancer,Organismal Injury and Abnormalities                                                      | Genitourinary adenocarcinoma                        | 5.15E-15   |         | AAAS,ABCBA,ABC81,AB    | 543         |
| 45   | Cancer,Organismal Injury and Abnormalities                                                      | Malignant genitourinary solid tumor                 | 7.5E-14    | -0.107  | AAAS,AATK,ABCBA,ABC    | 570         |
| 46   | Cancer,Organismal Injury and Abnormalities                                                      | Genital tumor                                       | 1.1E-14    | 1.501   | AAAS,AATK,ABCBA,ABC    | 540         |
| 47   | Cancer,Organismal Injury and Abnormalities                                                      | Pelvic tumor                                        | 1.63E-14   |         | AAAS,AATK,ABCBA,ABC    | 604         |
| 48   | Cancer,Organismal Injury and Abnormalities                                                      | Genitourinary carcinoma                             | 2.01E-14   | 0.896   | AAAS,ABCBA,ABC81,AB    | 590         |
| 49   | Cancer,Organismal Injury and Abnormalities                                                      | Colon adenocarcinoma                                | 3.18E-14   |         | AAAS,AATK,ABCBA,ABC    | 408         |
| 50   | Cancer,Organismal Injury and Abnormalities                                                      | Pelvic carcinoma                                    | 3.19E-14   |         | AAAS,AATK,ABCBA,ABC    | 408         |
| 51   | Cancer,Organismal Injury and Abnormalities                                                      | Colorectal carcinoma                                | 5.28E-14   |         | AAAS,AATK,ABCBA,ABC    | 429         |
| 52   | Cancer,Organismal Injury and Abnormalities                                                      | Genital tract cancer                                | 5.9E-14    |         | AAAS,AATK,ABCBA,ABC    | 561         |
| 53   | Cancer,Organismal Injury and Abnormalities                                                      | Colorectal carcinoma                                | 6.1E-14    |         | AAAS,AATK,ABCBA,ABC    | 451         |
| 54   | Cancer,Organismal Injury and Abnormalities                                                      | Uterine endometrioid carcinoma                      | 3.58E-13   | 0.948   | AAAS,ABCBA,ABC81,AB    | 453         |
| 55   | Cancer,Organismal Injury and Abnormalities                                                      | Uterine endometrioid carcinoma                      | 3.58E-13   |         | AAAS,ABCBA,ABC81,AB    | 260         |
| 56   | Cancer,Organismal Injury and Abnormalities                                                      | Colorectal tumor                                    | 3.58E-13   | 0.366   | AAAS,AATK,ABCBA,ABC    | 464         |
| 57   | Cancer,Organismal Injury and Abnormalities                                                      | Angiogenic cancer                                   | 4.76E-13   | 0.199   | AAAS,AATK,ABCBA,ABC    | 612         |
| 58   | Cancer,Organismal Injury and Abnormalities                                                      | Female genital tract cancer                         | 7.2E-13    |         | AAAS,ABCBA,ABC81,AB    | 232         |
| 59   | Cancer,Organismal Injury and Abnormalities                                                      | Endometrioid endometrial adenocarcinoma             | 8.85E-13   |         | AAAS,ABCBA,ABC81,AB    | 255         |
| 60   | Cancer,Organismal Injury and Abnormalities                                                      | Colorectal carcinoma                                | 1.02E-12   | -1.067  | AAAS,AATK,ABCBA,ABC    | 422         |
| 61   | Cancer,Organismal Injury and Abnormalities                                                      | Endometrial adenocarcinoma                          | 1.28E-12   |         | AAAS,ABCBA,ABC81,AB    | 477         |
| 62   | Cancer,Organismal Injury and Abnormalities                                                      | Development of digestive organ tumor                | 1.77E-12   | 3.047   | AAAS,AATK,ABCBA,ABC    | 420         |
| 63   | Cancer,Organismal Injury and Abnormalities                                                      | Endometrial carcinoma                               | 2.86E-12   |         | AAAS,ABCBA,ABC81,AB    | 291         |
| 64   | Cancer,Organismal Injury and Abnormalities                                                      | Abnormality of endocrine system                     | 7.38E-12   |         | AAAS,ABCBA,ABC81,AB    | 427         |
| 65   | Cancer,Organismal Injury and Abnormalities                                                      | Hepatobiliary carcinoma                             | 8.71E-12   | 2.138   | AAAS,AATK,ABCBA,ABC    | 426         |
| 66   | Cancer,Organismal Injury and Abnormalities                                                      | Female genital neoplasm                             | 9.74E-12   | 1.96    | AAAS,ABCBA,ABC81,AB    | 414         |
| 67   | Cancer,Organismal Injury and Abnormalities                                                      | Abnormal growth in endometrium                      | 9.75E-12   |         | AAAS,ABCBA,ABC81,AB    | 413         |
| 68   | Cancer,Organismal Injury and Abnormalities                                                      | Tumorigenesis of reproductive tract                 | 1.13E-11   | 1.96    | AAAS,ABCBA,ABC81,AB    | 414         |
| 69   | Cancer,Organismal Injury and Abnormalities                                                      | Development of genital tumor                        | 1.82E-11   | 1.446   | AAAS,ABCBA,ABC81,AB    | 400         |
| 70   | Cancer,Organismal Injury and Abnormalities                                                      | Female genital tract cancer                         | 4.62E-11   |         | AAAS,ABCBA,ABC81,AB    | 400         |
| 71   | Cancer,Organismal Injury and Abnormalities                                                      | Cancer of head                                      | 4.87E-11   | 2.613   | ABC81,ACV1R1,AMER1,A   | 159         |
| 72   | Cancer,Organismal Injury and Abnormalities                                                      | Endometrium tumor                                   | 5.13E-11   |         | AAAS,ABCBA,ABC81,AB    | 291         |
| 73   | Cancer,Organismal Injury and Abnormalities                                                      | Liver carcinoma                                     | 7.35E-11   | 2.138   | AAAS,AATK,ABCBA,ABC    | 401         |
| 74   | Cancer,Organismal Injury and Abnormalities                                                      | Endometrial cancer                                  | 1.05E-10   |         | AAAS,ABCBA,ABC81,AB    | 299         |
| 75   | Cancer,Organismal Injury and Abnormalities                                                      | Breast or gynecological cancer                      | 1.31E-10   | 0.555   | AAAS,ABCBA,ABC81,AB    | 440         |
| 76   | Cancer,Organismal Injury and Abnormalities                                                      | Colorectal disorder                                 | 1.53E-10   | 2.047   | AAAS,AATK,ABCBA,ABC    | 481         |
| 77   | Cancer,Organismal Injury and Abnormalities                                                      | Colorectal tumor                                    | 1.67E-10   | 0.343   | AAAS,AATK,ABCBA,ABC    | 469         |
| 78   | Cancer,Organismal Injury and Abnormalities                                                      | Hepatobiliary system cancer                         | 1.92E-10   | 2.261   | AAAS,AATK,ABCBA,ABC    | 468         |
| 79   | Cancer,Organismal Injury and Abnormalities                                                      | Uterine carcinoma                                   | 2.41E-10   |         | AAAS,ABCBA,ABC81,AB    | 297         |
| 80   | Cancer,Organismal Injury and Abnormalities                                                      | Breast or colorectal cancer                         | 2.72E-10   | -0.588  | AAAS,AATK,ABCBA,ABC    | 530         |
| 81   | Cancer,Organismal Injury and Abnormalities                                                      | Organization of cytoskeleton                        | 1.05E-09   | -4.002  | AATK,ABCBA,ABC81,AB    | 248         |
| 82   | Cancer,Organismal Injury and Abnormalities                                                      | Colorectal cancer                                   | 1.27E-09   | -0.896  | AAAS,AATK,ABCBA,ABC    | 457         |
| 83   | Cancer,Organismal Injury and Abnormalities                                                      | Metabolism of glycosphingolipid                     | 1.48E-09   |         | ABCBA,ABC81,ARSA,AS    | 69          |
| 84   | Lipid Metabolism,Small Molecule Biochemistry                                                    | Metabolism of membrane lipid derivative             | 1.55E-09   | -3.397  | ABCBA,ABC81,ABHD6,A    | 69          |
| 85   | Cancer,Organismal Injury and Abnormalities                                                      | Liver cancer                                        | 1.65E-09   | 2.261   | AAAS,AATK,ABCBA,ABC    | 406         |
| 86   | Cancer,Organismal Injury and Abnormalities                                                      | Liver tumor                                         | 2.35E-09   | 2.797   | AAAS,AATK,ABCBA,ABC    | 406         |
| 87   | Cancer,Organismal Injury and Abnormalities                                                      | Autosomal recessive neurological disorder           | 3.44E-09   |         | AAAS,ALDH18A1,ALG14    | 87          |
| 88   | Cancer,Organismal Injury and Abnormalities                                                      | Metabolism of glycolipid                            | 4.08E-09   | -2.581  | ABCBA,ABC81,ALG14,A    | 25          |
| 89   | Cancer,Organismal Injury and Abnormalities                                                      | Uterine tumor                                       | 4.1E-09    |         | AAAS,ABCBA,ABC81,AB    | 280         |
| 90   | Cancer,Organismal Injury and Abnormalities                                                      | Autism spectrum disorder or intellectual disability | 6.76E-09   |         | ABC81,ALDH18A1,AFSH    | 78          |
| 91   | Cancer,Organismal Injury and Abnormalities                                                      | Uterine cancer                                      | 6.89E-09   |         | AAAS,ABCBA,ABC81,AB    | 308         |
| 92   | Cancer,Organismal Injury and Abnormalities                                                      | Ora cancer                                          | 6.97E-09   |         | ABC81,AMER1,ANKRD1     | 338         |
| 93   | Cancer,Organismal Injury and Abnormalities                                                      | Oral cancer                                         | 7.66E-09   |         | ABC81,AMER1,ANKRD1     | 338         |
| 94   | Cancer,Organismal Injury and Abnormalities                                                      | Oral squamous cell carcinoma                        | 8.05E-09   |         | ABC81,AMER1,ANKRD1     | 338         |
| 95   | Cancer,Organismal Injury and Abnormalities                                                      | Autophagy of cells                                  | 9.75E-09   | -2.784  | ABSA,ATG3,BAQ8,BCL2L   | 62          |
| 96   | Cell Morphology,Cellular Function and Maintenance                                               | Autophagy                                           | 1.38E-08   | -2.544  | ABSD,ARSA,ATG3,BAQ8    | 68          |
| 97   | Cellular Assembly and Organization,Cellular Function and Maintenance                            | Organization of cytoskeleton                        | 1.74E-08   |         | AATK,ABC81,ACTR2,ADAF  | 248         |
| 98   | Cancer,Organismal Injury and Abnormalities                                                      | Liver lesion                                        | 2.34E-08   | 3.448   | AAAS,AATK,ABCBA,ABC    | 428         |
| 99   | Cancer,Organismal Injury and Abnormalities                                                      | Oral cavity carcinoma                               | 2.42E-08   |         | ABC81,AMER1,ANKRD1     | 170         |
| 100  | Cancer,Organismal Injury and Abnormalities                                                      | Mental retardation                                  | 6.02E-08   |         | ALDH18A1,ARHGGEF6,AF   | 48          |
| 101  | Cancer,Organismal Injury and Abnormalities                                                      | Upper gastrointestinal carcinoma                    | 5.03E-08   |         | AATK,ABCBA,ABC81,AB    | 269         |
| 102  | Cancer,Organismal Injury and Abnormalities                                                      | Metabolism of sphingolipid                          | 6.02E-08   | -2.647  | ABCBA,ABC81,ARSA,AS    | 29          |
| 103  | Cancer,Organismal Injury and Abnormalities                                                      | Upper gastrointestinal tract tumor                  | 6.86E-08   | 1.124   | AATK,ABCBA,ABC81,AB    | 251         |
| 104  | Cancer,Organismal Injury and Abnormalities                                                      | Upper or intellectual disability                    | 0.00000077 |         | ABC81,ALDH18A1,AFSH    | 65          |
| 105  | Cancer,Organismal Injury and Abnormalities                                                      | Upper gastrointestinal tract cancer                 | 8.57E-08   |         | AATK,ABCBA,ABC81,AB    | 279         |
| 106  | Cancer,Organismal Injury and Abnormalities                                                      | Microtubule dynamics                                | 9.77E-08   | -3.883  | AATK,ABC81,ACTR2,ADAF  | 142         |
| 107  | Cancer,Organismal Injury and Abnormalities                                                      | Transcription of RNA                                | 0.00000233 | -3.334  | ACTR2,ACV1R1,AKIRIN2,  | 196         |
| 108  | Cancer,Organismal Injury and Abnormalities                                                      | Malignant neoplasm of male genital organ            | 3.90E-08   |         | AATK,ABCBA,ABC81,AB    | 334         |
| 109  | Cancer,Organismal Injury and Abnormalities                                                      | Male genital neoplasm                               | 0.00000288 |         | AATK,ABCBA,ABC81,AB    | 334         |
| 110  | Cancer,Organismal Injury and Abnormalities                                                      | Prostatic carcinoma                                 | 0.00000273 |         | ABC81,ABC89,ABC83,AF   | 292         |
| 111  | Cancer,Organismal Injury and Abnormalities                                                      | Prostate cancer                                     | 0.00000275 |         | AATK,ABCBA,ABC81,AB    | 330         |
| 112  | Cancer,Organismal Injury and Abnormalities                                                      | Transport of vesicles                               | 0.00000339 | -1.276  | AATK,ABC81,APFC,BDC2,C | 24          |
| 113  | Cancer,Organismal Injury and Abnormalities                                                      | Prostatic tumor                                     | 0.00000342 |         | AATK,ABCBA,ABC81,AB    | 331         |
| 114  | Cancer,Organismal Injury and Abnormalities                                                      | Neoplasia of cells                                  | 0.00000507 | 0.711   | ABC81,ABC81,ABHD15,    | 463         |
| 115  | Cancer,Organismal Injury and Abnormalities                                                      | Ubiquitination of protein                           | 0.00000529 | -2.692  | AMER1,ATG3,BAQ8,BRA    | 58          |
| 116  | Organismal Survival                                                                             | Organisms' death                                    | 0.00000591 | 14.072  | ABC81,ABC81,ACV1R1,A   | 246         |
| 117  | Cancer,Organismal Injury and Abnormalities                                                      | Morbidity or mortality                              | 0.00000124 | 14.065  | ABC81,ABC81,ACV1R1,A   | 248         |
| 118  | Cancer,Organismal Injury and Abnormalities                                                      | Prostatic adenocarcinoma                            | 0.00000125 |         | ABC81,ABC89,ABC83,AF   | 277         |
| 119  | Cancer,Organismal Injury and Abnormalities                                                      | Hydrolysis of glycosphingolipid                     | 0.00000145 |         | ARSA,GBA2,HEXA,HEXE    | 5           |
| 120  | Cancer,Organismal Injury and Abnormalities                                                      | Abnormal morphology of liver                        | 0.0000162  | -2.2    | ABC83,ADOA,APC,ARID    | 35          |
| 121  | Cancer,Organismal Injury and Abnormalities                                                      | Breast or prostatic cancer                          | 0.00000171 | -0.2    | AATK,ABCBA,ABC81,AB    | 412         |
| 122  | Cancer,Organismal Injury and Abnormalities                                                      | Morphology of liver                                 | 0.00000225 |         | ABC83,ADOA,APC,ARID    | 48          |
| 123  | Hepatic System Development and Function,Hepatic System Disease,Organ Morphology                 | Familial mental retardation                         | 0.00000235 |         | ALDH18A1,ARHGGEF6,AF   | 48          |
| 124  | Cellular Assembly and Organization,Cellular Function and Maintenance                            | Expression of RNA                                   | 0.00000326 | -2.657  | ABC81,ACTR2,ACV1R1,    | 231         |
| 125  | Cellular Assembly and Organization,Cellular Function and Maintenance                            | Cell death of tumor cell lines                      | 0.00000402 | 3.227   | AAAS,AATK,ABCBA,ABC    | 170         |
| 126  | Cellular Assembly and Organization,Cellular Function and Maintenance                            | Accumulation of glycosphingolipid                   | 0.00000479 | 1.468   | ARSA,GAALC,GBA2,GNL1   | 163         |
| 127  | Lipid Metabolism,Molecular Transport,Small Molecule Biochemistry                                | Upper aero-digestive squamous cell carcinoma        | 0.00000483 |         | ABC81,AMER1,ANKRD1     | 8           |
| 128  | Cancer,Organismal Injury and Abnormalities                                                      | Accumulation of glycosphingolipid                   | 0.00000527 |         | ARSA,GAALC,ADAF,UGT8   | 17          |
| 129  | Lipid Metabolism,Molecular Transport,Small Molecule Biochemistry                                | Cognitive impairment                                | 0.00000529 | 0.965   | ALDH18A1,ARHGGEF6,AF   | 80          |
| 130  | Cancer,Organismal Injury and Abnormalities                                                      | Transcription                                       | 0.00000568 |         | ACTR2,ACV1R1,AKIRIN2,  | 361         |
| 131  | Cancer,Organismal Injury and Abnormalities                                                      | Infection by HIV-1                                  | 0.0000058  | -7.644  | ALG14,ATMIN,ATXN2,BIC  | 70          |
| 132  | Cancer,Organismal Injury and Abnormalities                                                      | Formation of cellular protrusions                   | 0.00000662 | -3.12   | ABC81,ACTR2,ADAF,APC   | 107         |
| 133  | Cancer,Organismal Injury and Abnormalities                                                      | Apoptosis of colorectal cancer cell lines           | 1.61E-07   |         | APC,ATMIN,BAQ8,BCL2,L  | 128         |
| 134  | Cancer,Organismal Injury and Abnormalities                                                      | Familial encephalopathy                             | 0.00000738 | -0.358  | ALDH18A1,ASAHI1,ANCI   | 10          |
| 135  | Hereditary Disorder,Neurological Disease,Organismal Injury and Abnormalities                    | Capillary hemangioma                                | 0.00000744 |         | ABC81,AMER1,BCL2L1,L   | 13          |
| 136  | Cancer,Organismal Injury and Abnormalities                                                      | Accumulation of sphingolipid                        | 0.00000757 | 1.54    | ARSA,GAALC,GBA2,GNL1   | 17          |
| 137  | Lipid Metabolism,Molecular Transport,Small Molecule Biochemistry                                | Hereditary neuropathy                               | 0.00000857 |         | ALDH18A1,ASAHI1,ATL1   | 37          |
| 138  | Hereditary Disorder,Neurological Disease,Organismal Injury and Abnormalities                    | Apoptosis of tumor cell lines                       | 0.00000915 | 2.707   | AAAS,AATK,ABCBA,ABC    | 138         |
| 139  | Hereditary Disorder,Neurological Disease,Organismal Injury and Abnormalities                    | Synthesis of sphingolipid                           | 0.0000105  | -2.231  | ABCBA,ABC81,ABHD15,    | 463         |
| 140  | Lipid Metabolism,Molecular Transport,Small Molecule Biochemistry                                | Repair of DNA                                       | 0.0000107  | -3.897  | ACS3,ATF2,ATMIN,BCL    | 146         |
| 141  | Cancer,Organismal Injury and Abnormalities                                                      | Melanoma                                            | 0.0000123  | -0.393  | AATK,ABCBA,ABC81,AB    | 589         |
| 142  | Cancer,Organismal Injury and Abnormalities                                                      | Infection of cells                                  | 0.0000132  | -7.855  | ABC81,ALG14,ATXN2,BI   | 70          |
| 143  | Cancer,Organismal Injury and Abnormalities                                                      | Cell viability of tumor cell lines                  | 0.0000135  | -6.073  | ABC81,APG5,AKS,ASA     | 85          |
| 144  | Cancer,Organismal Injury and Abnormalities                                                      | Transcription                                       | 0.0000231  |         | ACTR2,ACV1R1,AKIRIN2,  | 361         |
| 145  | Cancer,Organismal Injury and Abnormalities                                                      | Breast or ovarian carcinoma                         | 0.0000232  |         | ABCBA,ABC89,ABHD10,    | 253         |
| 146  | Cancer,Organismal Injury and Abnormalities                                                      | Morphogenesis of neurons                            | 0.0000255  | -1.997  | ABHI,ADAF1,APC,ARHG    | 74          |
| 147  | Cellular Growth and Proliferation,Neurological System Development and Function,Organ Morphology | Breast or ovarian cancer                            | 0.0000261  |         | ABCBA,ABC81,ACTO1,AC   | 202         |
| 148  | Cancer,Organismal Injury and Abnormalities                                                      | Malignant neoplasm of aerodigestive tract           |            |         |                        |             |

|     |                                                                                                                                                            |                                                          |           |        |                       |     |
|-----|------------------------------------------------------------------------------------------------------------------------------------------------------------|----------------------------------------------------------|-----------|--------|-----------------------|-----|
| 151 | Carbohydrate Metabolism,Lipid Metabolism,Small Molecule Biochemistry                                                                                       | Synthesis of phosphatidylinositol                        | 0.0000308 | -0.728 | CD51,HSPAS5,INPP4A,IN | 20  |
| 152 | Cell Morphology,Cellular Assembly and Organization                                                                                                         | Synthesis of phospholipid                                | 0.0000347 |        | BAK,CLN3,CTSA,DNM2    | 10  |
| 153 | Lipid Metabolism,Small Molecule Biochemistry                                                                                                               | Synthesis of phospholipid                                | 0.0000362 | -1.293 | ABCAB,AGPS,ATF6,CDS   | 32  |
| 154 | Digestive System Development and Function,Gastrointestinal Disease                                                                                         | Abnormal morphology of digestive system                  | 0.0000384 |        | ABCBI,ABCD3,ACOH,AF   | 67  |
| 155 | Lipid Metabolism,Small Molecule Biochemistry                                                                                                               | Metabolism of phospholipid                               | 0.0000405 | -2.279 | ABCBA,ABHD6,AGPS,AT   | 36  |
| 156 | Cell Death and Survival                                                                                                                                    | Cell death of neuroepithelial precursor cells            | 0.0000419 | 0.046  | DICER1,ERBB3,HTT,P33  | 6   |
| 157 | Intellectual Disability,Hereditary Disorder,Neurological Disease,Organismal Injury and Abnormalities                                                       | Autosomal dominant mental retardation                    | 0.0000445 |        | ARID2,ATP6V1B2,CDK1   | 18  |
| 158 | Cell Death and Survival                                                                                                                                    | Cell viability                                           | 0.0000483 | -6.186 | ABCBI,AGPS,AK3,AMIG   | 147 |
| 159 | Endocrine System Disorders,Organismal Injury and Abnormalities,Reproductive System Development and Function                                                | Ovarian tumor                                            | 0.0000514 |        | ABCBA,ABCBI,ABCBA,A   | 168 |
| 160 | Cellular Function and Maintenance,Cellular Growth and Proliferation,Nervous System Development and Function                                                | Cell death of connective tissue cells                    | 0.0000519 | -0.894 | ABCBI,ASAH1,ATF2,ATF  | 69  |
| 161 | Cellular Function and Maintenance,Cellular Growth and Proliferation,Nervous System Development and Function                                                | Neurogenesis                                             | 0.0000524 | -1.997 | ABH1,ADAP1,APC,ARHG   | 7   |
| 162 | Cancer,Organismal Injury and Abnormalities                                                                                                                 | Upper aerodigestive tract carcinoma                      | 0.0000527 |        | ABCBA,ABCBI,ACOI,AC   | 196 |
| 163 | Carbohydrate Metabolism,Lipid Metabolism,Small Molecule Biochemistry                                                                                       | Synthesis of lipids                                      | 0.0000542 | -1.673 | ATF6,CD51,CTBP2,DKG   | 28  |
| 164 | Intellectual Disability,Hereditary Disorder,Neurological Disease,Organismal Injury and Abnormalities                                                       | Dominant mental retardation                              | 0.0000555 |        | ARID2,ATP6V1B2,CDK1   | 19  |
| 165 | Cellular Function and Maintenance,Cellular Growth and Proliferation,Nervous System Development and Function                                                | Morphology of cellular protrusions                       | 0.0000582 |        | AATK,AP1M2,APC,ARSA   | 39  |
| 166 | Endocrine System Disorders,Organismal Injury and Abnormalities,Reproductive System Development and Function                                                | Ovarian cancer                                           | 0.0000609 |        | ABCBA,ABCBI,ABCBA,A   | 164 |
| 167 | Cellular Function and Maintenance,Cellular Growth and Proliferation,Nervous System Development and Function                                                | Abnormal morphology of Purkinje cell layer of cerebellum | 0.0000645 |        | ARSA,ATXN2,BICD2,CLN  | 14  |
| 168 | Endocrine System Disorders,Organismal Injury and Abnormalities,Reproductive System Development and Function                                                | Gonadal tumor                                            | 0.0000664 | 1.387  | ABCBA,ABCBI,ABCBA,A   | 173 |
| 169 | Cellular Assembly and Organization,Cellular Compromise                                                                                                     | Formation of cellular inclusion bodies                   | 0.0000684 | -1.721 | ATF6,BAFG,BCL2L1,CRY  | 15  |
| 170 | Cellular Function and Maintenance,Cellular Growth and Proliferation,Nervous System Development and Function                                                | Apoptosis                                                | 0.0000683 | 2.677  | AAAS,AATK,ABCBI,ABR   | 254 |
| 171 | Carbohydrate Metabolism,Lipid Metabolism,Small Molecule Biochemistry                                                                                       | Metabolism of phosphatidic acid                          | 0.0000687 | -2.496 | ATF6,CD51,CTBP2,DKG   | 30  |
| 172 | Cellular Function and Maintenance,Cellular Growth and Proliferation,Nervous System Development and Function                                                | Apoptosis of fibroblast cell lines                       | 0.0000676 | -1.495 | ABCBI,ASAH1,ATF2,ATF  | 40  |
| 173 | Cellular Function and Maintenance,Cellular Growth and Proliferation,Nervous System Development and Function                                                | Cell cycle progression                                   | 0.0000695 | -2.989 | ABRAXAS2,AMER1,ANK    | 111 |
| 174 | Lipid Metabolism,Small Molecule Biochemistry                                                                                                               | Accumulation of cerebroside                              | 0.0000914 | 1.165  | ARSA,GAL,GBA2,PSAP    | 5   |
| 175 | Cellular Function and Maintenance,Cellular Growth and Proliferation,Nervous System Development and Function                                                | Autophagy of tumor cell lines                            | 0.0000922 | -2.973 | ATG3,BAX,BCL2L1,CRY   | 25  |
| 176 | Cellular Function and Maintenance,Cellular Growth and Proliferation,Nervous System Development and Function                                                | Morphology of microvilli                                 | 0.0000944 |        | AP1M2,PLS1,PLS3,RAE   | 6   |
| 177 | Intellectual Disability,Hereditary Disorder,Neurological Disease,Organismal Injury and Abnormalities,Skeletal and Muscular System Development and Function | Autosomal dominant hereditary spastic paraplegia         | 0.0000944 |        | ALDH18A1,ATL1,OPTIC1  | 28  |
| 178 | Cellular Function and Maintenance,Cellular Growth and Proliferation,Nervous System Development and Function                                                | Cell death of colorectal cancer cell lines               | 0.0001047 | 1.335  | APC,ATMIN,BAX,BCL2L1  | 39  |
| 179 | Cellular Function and Maintenance,Cellular Growth and Proliferation,Nervous System Development and Function                                                | Opening of cellular membrane                             | 0.00011   |        | BAX,BCL2L1,IBD        | 3   |
| 180 | Cellular Growth and Proliferation,Organismal Development                                                                                                   | Growth of yeast                                          | 0.000116  | 0.522  | ABCBI,ALG14,ATXN2,B   | 15  |
| 181 | DNA Replication,Recombination, and Repair                                                                                                                  | Metabolism of DNA                                        | 0.00012   | 0.016  | ABCBI,ANKRD17,APC,A   | 46  |
| 182 | Cancer,Organismal Injury and Abnormalities                                                                                                                 | Mixed neoplasia                                          | 0.00012   |        | ABCBA,ACADS,ACTR2,A   | 136 |
| 183 | Cellular Function and Maintenance                                                                                                                          | Clastrin mediated endocytosis                            | 0.00012   | -2.791 | ATP6AP1,ATP6V1B2,CD   | 13  |
| 184 | Intellectual Disability,Hereditary Disorder,Neurological Disease,Organismal Injury and Abnormalities                                                       | Development of neurons                                   | 0.0001232 | -3.665 | ABH1,ADAP1,AMIGQ2,AP  | 89  |
| 185 | Cellular Function and Maintenance,Cellular Growth and Proliferation,Nervous System Development and Function                                                | Cellular death                                           | 0.000133  | 2.181  | ARSA,ATF2,ATP6V1B2    | 14  |
| 186 | Lipid Metabolism,Small Molecule Biochemistry                                                                                                               | Synthesis of glycolipid                                  | 0.000135  | -2.156 | ABCBA,ABCBI,ALG14,AI  | 14  |
| 187 | Endocrine System Disorders,Organismal Injury and Abnormalities,Reproductive System Development and Function                                                | Development of gonadal tumor                             | 0.000148  |        | ABCBA,ABCBA,ABHD6,A   | 141 |
| 188 | Lipid Metabolism,Small Molecule Biochemistry                                                                                                               | Synthesis of lipids                                      | 0.000151  | -3.705 | ABCBA,ABCBI,ABCBA,A   | 168 |
| 189 | Endocrine System Disorders,Organismal Injury and Abnormalities,Reproductive System Development and Function                                                | Ovarian carcinoma                                        | 0.000159  |        | ABCBA,ABCBA,ABHD6,A   | 147 |
| 190 | Infectious Diseases                                                                                                                                        | HIV infection                                            | 0.000164  | -7.705 | ABCBI,ALG14,ATMIN,AT  | 75  |
| 191 | Cellular Function and Maintenance,Cellular Growth and Proliferation,Nervous System Development and Function                                                | Apoptosis of endoderm                                    | 0.000164  | 2      | CUL1,HNFA4,HTT,VPSA   | 4   |
| 192 | Carbohydrate Metabolism                                                                                                                                    | Synthesis of carbohydrate                                | 0.000191  | -1.404 | AKR1A1,ALG14,SH3BP2   | 97  |
| 193 | Cancer,Hematological Disease,Organismal Injury and Abnormalities                                                                                           | Neoplasia of blood cells                                 | 0.00019   | 2.617  | ABCBI,ABRAXAS2,A      | 278 |
| 194 | Development and Function,Neurological Disease,Organ Morphology,Organismal Development and Function                                                         | Loss of Purkinje cells                                   | 0.00019   |        | ATXN2,EI24,HTT,OSTM1  | 6   |
| 195 | Infectious Diseases                                                                                                                                        | Cell death of fibroblast cell lines                      | 0.000197  | -1.685 | ABCBI,ASAH1,ATF2,ATF  | 49  |
| 196 | Infectious Diseases                                                                                                                                        | Viral infection                                          | 0.0002    | -7.507 | AAAS,ABCBI,ABH1,ACTR  | 153 |
| 197 | Cellular Function and Maintenance,Cellular Growth and Proliferation,Nervous System Development and Function                                                | Cell survival                                            | 0.000201  | -6.138 | ABCBI,AGPS,AK3,AMIG   | 150 |
| 198 | Cellular Function and Maintenance,Cellular Growth and Proliferation,Nervous System Development and Function                                                | Morphology of mitochondria                               | 0.000214  |        | ACOT13,ATF2,CTCF,CUL  | 22  |
| 199 | Hereditary Disorder,Neurological Disease,Organismal Injury and Abnormalities                                                                               | Acute myeloid leukemia                                   | 0.000217  | 0.272  | ABCBI,ABCBI,ABCBI,A   | 152 |
| 200 | Cellular Function and Maintenance,Cellular Growth and Proliferation,Nervous System Development and Function                                                | Formation of microvilli                                  | 0.000219  |        | ATP8B1,DAO1,HNFA4,PL  | 7   |
| 201 | Cancer,Organismal Injury and Abnormalities                                                                                                                 | Extradural retroperitoneal tumor                         | 0.000221  | 1.444  | AATK,ABCBI,ABCD3,AB   | 294 |
| 202 | Hereditary Disorder,Neurological Disease,Organismal Injury and Abnormalities                                                                               | Autosomal dominant neuropathy                            | 0.000223  | -6.15  | ALDH18A1,ATL1,CHMP2   | 13  |
| 203 | Cancer,Gastrointestinal Disease,Organismal Injury and Abnormalities                                                                                        | Gastric carcinoma                                        | 0.000224  |        | ABCBI,ABCBI,ACO1,ACV  | 130 |
| 204 | Digestive System Development and Function                                                                                                                  | Morphology of digestive system                           | 0.000226  |        | ABCBI,ABCD3,ACOH,AF   | 77  |
| 205 | Cellular Function and Maintenance,Cellular Growth and Proliferation,Nervous System Development and Function                                                | Macroautophagy                                           | 0.000226  | -1.982 | ATG3,CHMP2A,CHMP2B    | 18  |
| 206 | Hereditary Disorder,Neurological Disease,Organismal Injury and Abnormalities                                                                               | Myeloid leukemia                                         | 0.000231  | -0.073 | ABCBI,ABCBI,ABCBI,A   | 156 |
| 207 | Endocrine System Disorders,Organismal Injury and Abnormalities,Reproductive System Development and Function                                                | Ovarian adenocarcinoma                                   | 0.000238  |        | ABCBA,ABCBA,ABHD6,A   | 139 |
| 208 | Endocrine System Disorders,Organismal Injury and Abnormalities,Reproductive System Development and Function                                                | Morphology of cerebellar cortex cells                    | 0.000254  |        | ARSA,ATXN2,BICD2,EI2  | 12  |
| 209 | Intellectual Disability,Hereditary Disorder,Neurological Disease,Organismal Injury and Abnormalities                                                       | Recessive mental retardation                             | 0.00027   |        | ALDH18A1,ARHGFE,AS    | 25  |
| 210 | Cellular Function and Maintenance,Cellular Growth and Proliferation,Nervous System Development and Function                                                | Dysregulation of neurons                                 | 0.000282  | 2.136  | ABCBI,ATF2,ATF2,ATF   | 69  |
| 211 | Cancer,Hematological Disease,Organismal Injury and Abnormalities                                                                                           | Hematopoietic neoplasm                                   | 0.000288  | 2.726  | ABCBI,ABH1,ABRAXAS2   | 279 |
| 212 | Cellular Function and Maintenance,Cellular Growth and Proliferation,Nervous System Development and Function                                                | Apoptosis of embryonic cell lines                        | 0.000288  | -1.618 | ATF2,ATG3,BAX,BCL2L1  | 34  |
| 213 | Cellular Function and Maintenance,Cellular Growth and Proliferation,Nervous System Development and Function                                                | Apoptosis of embryonic tissue                            | 0.000294  | -1.449 | AMER1,CUL1,HNFA4,A    | 15  |
| 214 | Lipid Metabolism,Small Molecule Biochemistry                                                                                                               | Catabolism of lipid                                      | 0.000294  | -3.093 | ABHD6,ACB5,ADAL,AP    | 91  |
| 215 | Cancer,Cardiovascular Disease,Organismal Injury and Abnormalities                                                                                          | Hemangioblastoma                                         | 0.000295  |        | ABCBI,AMER1,DDX6,DI   | 10  |
| 216 | Organismal Development                                                                                                                                     | Arrest in growth of organism                             | 0.000296  |        | ACVR1,ATF2,CTCF,CUL   | 22  |
| 217 | Cancer,Gastrointestinal Disease,Organismal Injury and Abnormalities                                                                                        | Rectal adenocarcinoma                                    | 0.000301  |        | ABCBI,AMER1,AMIGQ2    | 5   |
| 218 | Development and Function,Neurological Disease,Organ Morphology,Organismal Development and Function                                                         | Morphology of cerebral cortex                            | 0.000309  |        | ARHGAP5,ARL6,BACE1    | 30  |
| 219 | Development and Function,Neurological Disease,Organ Morphology,Organismal Development and Function                                                         | Abnormal morphology of cerebellar cortex                 | 0.00033   |        | ARSA,ATXN2,BICD2,CLN  | 15  |
| 220 | Cancer,Organismal Injury and Abnormalities                                                                                                                 | Cancer                                                   | 0.00037   | 1.953  | ABCBI,ABCBI,ABHD15    | 374 |
| 221 | Cellular Function and Maintenance,Cellular Growth and Proliferation,Nervous System Development and Function                                                | G2/M phase                                               | 0.00035   | -0.378 | ABCBI,ATF2,BCL2L1,IB  | 34  |
| 222 | Cancer,Hematological Disease,Organismal Injury and Abnormalities                                                                                           | Bone marrow neoplasm                                     | 0.000354  | 0.439  | ABCBI,ABH1,ACBD5,AD   | 168 |
| 223 | Cancer,Gastrointestinal Disease,Organismal Injury and Abnormalities                                                                                        | Cecum adenocarcinoma                                     | 0.000369  |        | AMER1,APC,ARHGAP5,A   | 74  |
| 224 | Development and Function,Neurological Disease,Organ Morphology,Organismal Development and Function                                                         | Morphology of hippocampus                                | 0.00037   |        | ARL6,BACE1,CEP350,M   | 54  |
| 225 | Carbohydrate Metabolism                                                                                                                                    | Metabolism of carbohydrate                               | 0.00039   | -1.517 | ABCBI,AKR1A1,ALG14,I  | 74  |
| 226 | Cellular Function and Maintenance,Cellular Growth and Proliferation,Nervous System Development and Function                                                | Extension of cellular protrusions                        | 0.000401  | -2.693 | AATK,ARHGAP20,ARHG    | 57  |
| 227 | Cellular Function and Maintenance,Cellular Growth and Proliferation,Nervous System Development and Function                                                | Infection of tumor cell lines                            | 0.000401  | -6.15  | ACTR2,ADAL,ALG14,BI   | 23  |
| 228 | Cellular Function and Maintenance,Cellular Growth and Proliferation,Nervous System Development and Function                                                | Cycling of centrosome                                    | 0.000422  | -1.646 | CCT110,CEP70,CEP88    | 16  |
| 229 | Cancer,Hematological Disease,Organismal Injury and Abnormalities                                                                                           | Hematologic cancer                                       | 0.000425  | 2.49   | ABCBI,ABRAXAS2,ACBI   | 274 |
| 230 | Cellular Function and Maintenance,Cellular Growth and Proliferation,Nervous System Development and Function                                                | Size of microvilli                                       | 0.000425  |        | PLS1,RAE8A,USH1C      | 3   |
| 231 | Cancer,Gastrointestinal Disease,Organismal Injury and Abnormalities                                                                                        | Right colon cancer                                       | 0.000428  |        | APC,KRAS,MSH2         | 3   |
| 232 | Cancer,Organismal Injury and Abnormalities,Reproductive System Development and Function                                                                    | Breast carcinoma                                         | 0.000428  |        | ABCBA,ABHD10,ACOT9,   | 153 |
| 233 | Gene Expression                                                                                                                                            | Activation of DNA endogenous promoter                    | 0.000429  | -3.654 | ACTR2,ACVR1,AKIRIN2,  | 122 |
| 234 | Behavior                                                                                                                                                   | Habituation                                              | 0.000463  | -1.342 | BACE1,CERS6,KAP5,F    | 8   |
| 235 | Cellular Function and Maintenance,Cellular Growth and Proliferation,Nervous System Development and Function                                                | Lymphoreticular neoplasm                                 | 0.000473  | 2.559  | ABCBI,ABH1,ABRAXAS2   | 245 |
| 236 | Cellular Function and Maintenance,Cellular Growth and Proliferation,Nervous System Development and Function                                                | Double-stranded DNA break repair of tumor cell lines     | 0.000473  | -0.958 | BM1,DEK,PBR1,RS1,R    | 9   |
| 237 | Cancer,Organismal Injury and Abnormalities                                                                                                                 | Clear-cell adenocarcinoma                                | 0.000501  |        | ABCBI,ACADS,ADAL,AP   | 91  |
| 238 | Cellular Function and Maintenance,Cellular Growth and Proliferation,Nervous System Development and Function                                                | Site of origin of cancer                                 | 0.000512  |        | BAK,CLN3,CTSA,DNM2    | 10  |
| 239 | Cancer,Hematological Disease,Organismal Injury and Abnormalities                                                                                           | Malignant myeloid neoplasm                               | 0.000512  | 1.034  | ABCBI,ACB5,ADAL,AP    | 162 |
| 240 | Cellular Function and Maintenance,Cellular Growth and Proliferation,Nervous System Development and Function                                                | Macroautophagy of cells                                  | 0.000512  | -1.715 | ATG3,CHMP2A,CHMP2B    | 17  |
| 241 | Intellectual Disability,Hereditary Disorder,Neurological Disease,Organismal Injury and Abnormalities,Psychological Development and Function                | Familial atrophic lateral sclerosis                      | 0.000534  |        | BCL2L1,CHMP2B,GRN,A   | 8   |
| 242 | Hereditary Disorder,Neurological Disease,Organismal Injury and Abnormalities                                                                               | Acute leukemia                                           | 0.000536  | -0.161 | ABCBI,ABCBI,ABCBI,A   | 161 |
| 243 | Development and Function,Neurological Disease,Organ Morphology,Organismal Development and Function                                                         | Abnormal morphology of Purkinje cells                    | 0.000537  |        | ARSA,ATXN2,EI24,FMR1  | 11  |
| 244 | Cancer,Hematological Disease,Organismal Injury and Abnormalities                                                                                           | Bone marrow cancer                                       | 0.00057   | 0.428  | ABCBI,ACB5,ADAL,AP    | 163 |
| 245 | Embryonic Development,Organismal Development                                                                                                               | Arrest in growth of embryo                               | 0.000577  |        | ACVR1,ATF2,CTCF,CUL   | 21  |
| 246 | Cellular Function and Maintenance,Cellular Growth and Proliferation,Nervous System Development and Function                                                | Neuronal cell death                                      | 0.00058   | 1.418  | AATK,AMIGQ2,APC,ASA   | 705 |
| 247 | Intellectual Disability,Hereditary Disorder,Neurological Disease,Organismal Injury and Abnormalities                                                       | Head and neck squamous cell carcinoma                    | 0.000585  |        | ABCBI,ABCBI,AMER1,A   | 25  |
| 248 | Intellectual Disability,Hereditary Disorder,Neurological Disease,Organismal Injury and Abnormalities                                                       | Autosomal recessive mental retardation                   | 0.0006    |        | ALDH18A1,ACCC3,CASP   | 20  |
| 249 | Cancer,Gastrointestinal Disease,Organismal Injury and Abnormalities                                                                                        | Gastric adenocarcinoma                                   | 0.000628  |        | ABCBI,ABCBI,ABCBI,A   | 122 |
| 250 | Lipid Metabolism,Small Molecule Biochemistry                                                                                                               | Synthesis of glycosphingolipid                           | 0.000643  | -1.922 | ABCBA,ABCBI,ARSA,B4   | 9   |
| 251 | Protein Synthesis                                                                                                                                          | Homo-oligomerization of protein                          | 0.000655  |        | AKC3,APC,ATL1,ATL2,BA | 22  |
| 252 | Lipid Metabolism,Small Molecule Biochemistry                                                                                                               | Concentration of lipid                                   | 0.000667  | -0.808 | ABCBI,ABHD6,ACOT13    | 65  |
| 253 | Lipid Metabolism,Small Molecule Biochemistry                                                                                                               | Metabolism of protein                                    | 0.000669  | -1.871 | ABCBI,ACO1,ACR,AKIP1  | 117 |
| 254 | Cancer,Gastrointestinal Disease,Organismal Injury and Abnormalities                                                                                        | Rectum cancer                                            | 0.000672  |        | ACB5,AMER1,AMIGQ2,    | 57  |
| 255 | Cancer,Hematological Disease,Organismal Injury and Abnormalities                                                                                           | Myeloid neoplasm                                         | 0.000672  | 0.729  | ABCBI,ABH1,ACB5,AD    | 167 |
| 256 | Cellular Function and Maintenance,Cellular Growth and Proliferation,Nervous System Development and Function                                                | Interphase                                               | 0.000688  | -1.837 | ABCBI,ACVR1,APC,ATF   | 79  |
| 257 | Infectious Diseases,Organismal Injury and Abnormalities                                                                                                    | Infection of embryonic cell lines                        | 0.000699  | -5.559 | ATMIN,ATXN2,CD164,C   | 31  |
| 258 | Auditory Disease,Neurological Disease                                                                                                                      | Hearing loss                                             | 0.000704  | 3.07   | ABCBI,ARSA,ATP6V1B2   | 29  |
| 259 | Cellular Function and Maintenance,Cellular Growth and Proliferation,Nervous System Development and Function                                                | Polarization of neurons                                  | 0.000706  |        | APC,GSK3B,HTT,KIF3A,F | 5   |
| 260 | Cellular Function and Maintenance,Cellular Growth and Proliferation,Nervous System Development and Function                                                | Cell death of lung cancer cell lines                     | 0.000717  | -0.296 | AMER1,BAK,BCL2L1,IB   | 35  |
| 261 | Cellular Function and Maintenance,Cellular Growth and Proliferation,Nervous System Development and Function                                                | Maintenance of stem cells                                | 0.000725  |        | APC,BMPR1A,DDX6,DIC   | 12  |
| 262 | Cellular Function and Maintenance,Cellular Growth and Proliferation,Nervous System Development and Function                                                | Catabolism of protein                                    | 0.000742  | -2.074 | ACR,ANAPC10,APC,ATF   | 67  |
| 263 | Cellular Function and Maintenance,Cellular Growth and Proliferation,Nervous System Development and Function                                                | Fragmentation of cells                                   | 0.000744  | -0.642 | ABCBI,ABCBI,BAK,BCL   | 1   |
| 264 | Cancer,Organismal Injury and Abnormalities,Reproductive System Development and Function                                                                    | Breast cancer                                            | 0.000746  | 0.152  | ABCBA,ABCBI,ABHD10,   | 203 |
| 265 | Cellular Function and Maintenance,Cellular Growth and Proliferation,Nervous System Development and Function                                                | Degeneration of cells                                    | 0.000757  | 3.312  | ARSA,ATF2,ATP6V1B2    | 40  |
| 266 | Intellectual Disability,Hereditary Disorder,Neurological Disease,Organismal Injury and Abnormalities                                                       | Familial acute myeloid leukemia                          | 0.000769  |        | APC,CHIC2,KRAS,MSH2   | 6   |
| 267 | Infectious Diseases                                                                                                                                        | Infection of epithelial cell lines                       | 0.000771  | -5.468 | ATMIN,ATXN2,CD164,C   | 30  |
| 268 | Cancer,Gastrointestinal Disease,Organismal Injury and Abnormalities                                                                                        | Loss of brain cells                                      | 0.000775  |        | ABCBI,ADAL,APC,CEP    | 30  |
| 269 | Cellular Function and Maintenance,Cellular Growth and Proliferation,Nervous System Development and Function                                                | Expansion of endoplasmic reticulum                       | 0.000782  | 0.254  | ATXN2,CHMP2B,DICER1   | 10  |
| 270 | Cellular Function and Maintenance,Cellular Growth and Proliferation,Nervous System Development and Function                                                | Senescence of fibroblast cell lines                      | 0.000827  | -0.682 | ARHGAP5,BMI1,BRD7,D   | 19  |
| 271 | Cellular Function and Maintenance,Cellular Growth and Proliferation,Nervous System Development and Function                                                | Apoptosis of connective tissue cells                     | 0.000836  | -0.38  | ATF2,ATF6,BAX,BCL2L1  | 34  |
| 272 | Cellular Function and Maintenance,Cellular Growth and Proliferation,Nervous System Development and Function                                                | Transport of protein                                     | 0.000852  | -1.965 | ABCBA,AP1M2,APPBP2,   | 35  |
| 273 | Cancer,Gastrointestinal Disease,Organismal Injury and Abnormalities                                                                                        | Gastroesophageal adenocarcinoma                          | 0.000871  |        | ABCBA,ABCBI,ABCBI,A   | 146 |
| 274 | Drug Metabolism,Small Molecule Biochemistry                                                                                                                | Transport of drug                                        | 0.000872  |        | ABCBI,HSP,RALBP1,RI   | 4   |
| 275 | Embryonic Development,Organismal Development,Tissue Development                                                                                            | Development of epiblast                                  | 0.000877  |        | APC,EED,IHH,SBS       | 5   |
| 276 | Cellular Function and Maintenance,Cellular Growth and Proliferation,Nervous System Development and Function                                                | Expansion of endoplasmic reticulum                       | 0.000877  | 0.254  | ATF6,ALG3,HSPA5,SUC   | 4   |
| 277 | Intellectual Disability,Hereditary Disorder,Neurological Disease,Organismal Injury and Abnormalities                                                       | Primary sclerosing cholangitis                           | 0.000887  |        | BAX,BCL2L1,CASP2,CAI  | 8   |
| 278 | Infectious Diseases                                                                                                                                        | Infection of cervical cancer cell lines                  | 0.000933  | -5.771 | ADAL,ALG14,BICD2,BMF  | 44  |
| 279 | Cancer,Gastrointestinal Disease,Organismal Injury and Abnormalities                                                                                        | Pancreaticobiliary tumor                                 | 0.000943  | 1.664  | AATK,ABCD3,ABCD4,AB   | 258 |
| 280 | Hydrate Metabolism,Lipid Metabolism,Small Molecule Biochemistry                                                                                            | Concentration of phosphatidic acid                       | 0.000959  | -1.27  | BAK,IBD,CD51,CERS6,C  | 20  |
| 281 | Development and Function,Neurological Disease,Organ Morphology,Organismal Development and Function                                                         | Morphology of Purkinje cells                             | 0.000961  | 0.943  | ARSA,ATXN2,BICD2,IBD  | 20  |
| 282 | Cellular Function and Maintenance,Cellular Growth and Proliferation,Nervous System Development and Function                                                | Colony formation of bone cancer cell lines               | 0.000961  | 0.943  | BM1,CNOT7,DICER1,MT   | 5   |
| 283 | Intellectual Disability,Hereditary Disorder,Neurological Disease,Organismal Injury and Abnormalities,Skeletal and Muscular System Development and Function | Hereditary spastic paraplegia                            | 0.000966  |        | ALDH18A1,ATL1,BCID2,  | 11  |
| 284 | Cellular Function and Maintenance,Cellular Growth and Proliferation,Nervous System Development and Function                                                | Mitosis                                                  | 0.000978  | -1.254 | ABRAXAS2,ANKS1A,BRU   | 53  |
| 285 | Cellular Function and Maintenance,Cellular Growth and Proliferation,Nervous System Development and Function                                                | Permeabilization of mitochondria                         | 0.00098   | -0.908 | BAX,BCL2L1,CASP2      | 2   |
| 286 | Development and Function,Neurological Disease,Organismal Development,Tissue Development and Function                                                       | Morphology of intestinal epithelium                      | 0.000989  |        | ABCBI,AP1M2,DICER1,I  | 7   |
| 287 | Cellular Function and Maintenance,Cellular Growth and Proliferation,Nervous System Development and Function                                                | Morphology of neurons                                    | 0.00102   |        | AATK,ARSA,ATXN2,BA    | 65  |
| 288 | Cancer,Neurological Disease,Organismal Injury and Abnormalities                                                                                            | Meloid leukemia                                          | 0.00102   | 2.425  | APC,BAK,BCL2L1,BMI1   | 3   |
| 289 | Cellular Function and Maintenance,Cellular Growth and Proliferation,Nervous System Development and Function                                                | Movement of centrosome                                   | 0.00102   |        | APC,GSK3B,PAR6A       | 3   |
| 290 | Cancer,Hereditary Disorder,Organismal Injury and Abnormalities                                                                                             | Turcot syndrome                                          | 0.00102   |        | APC,MSH2,P            |     |



|     |                                                                                |                                                             |         |        |                         |     |
|-----|--------------------------------------------------------------------------------|-------------------------------------------------------------|---------|--------|-------------------------|-----|
| 301 |                                                                                | Neurodegeneration                                           | 0.0012  | 2.584  | ARBA,ATF2,ATF81,BAC     | 37  |
| 302 | Cellular Development,Cellular Growth and Proliferation                         | Colony formation of sarcoma cell lines                      | 0.00121 | 1.226  | BMI1,CHOT1,DICER1,MT    | 37  |
| 303 | Cellular Compromise,DNA Replication, Recombination, and Repair                 | Chromosomal instability                                     | 0.00121 | 2.488  | ABRAXAS2,APC,CDK12,C    | 37  |
| 304 | Cancer,Organismal Injury and Abnormalities,Reproductive System Disease         | Mammary tumor                                               | 0.00121 | 0.365  | ABCBA,ABCB1,ABHD10      | 212 |
| 305 | Neurological Disease                                                           | Degeneration of nervous system                              | 0.00123 | 2.375  | ARSA,ATF2,ATF81,BAC     | 34  |
| 306 | Cellular Development                                                           | Morphology of embryo                                        | 0.00127 | 1.339  | AATK,ARHGAP1,ARHGAP5    | 101 |
| 307 | Cell Death and Survival                                                        | Cell viability of gastrointestinal stromal tumor cell lines | 0.00128 | -2.224 | IGF2R,ZNF254,ZNF429,Z   | 5   |
| 308 | Cancer,Gastrointestinal Disease,Organismal Injury and Abnormalities            | Apoptosis of fetal neuron                                   | 0.00128 | -1.446 | BAK,BCL2L1,CEBP2,PAI    | 16  |
| 309 | Cellular Development and Maintenance                                           | Stomach tumor                                               | 0.00128 | 2.886  | AATK,ABCB1,ABCB1,AC1    | 139 |
| 310 | Cellular Death and Survival                                                    | Glioma tumor cell lines                                     | 0.0013  | -2.966 | ACR13,ACR2B,ACR3,ACT    | 199 |
| 311 | Cell Death and Survival                                                        | Apoptosis of lung cancer cell lines                         | 0.0013  | -0.369 | AMER1,BAK,BCL2L1,BID    | 30  |
| 312 | Cell Death and Survival                                                        | Apoptosis of neuronal progenitor cells                      | 0.00133 | 1.067  | DICER1,ERBB3,HTT,RGB    | 4   |
| 313 | Cell Death and Survival/Neurological Development                               | Ankonia of embryonic cell lines                             | 0.00134 | 1.568  | AATK,ARHGAP1,ARHGAP5    | 4   |
| 314 | Cell Morphology                                                                | Permeabilization of liposome                                | 0.00133 | -1.067 | BAK,BID,FGFR1,TRC1      | 4   |
| 315 | Organismal Development                                                         | Growth of organoid                                          | 0.00133 | 1.339  | ARCB1,ACR13,ARHGAP5     | 4   |
| 316 | DNA Replication, Recombination, and Repair, Gene Expression                    | Methylation of DNA                                          | 0.00134 | 0.52   | ARF1,ARID4A,ATF7IP,CTC  | 11  |
| 317 | Cell Morphology,Cell Function and Maintenance                                  | Repair of tumor cell lines                                  | 0.00136 | -5.468 | ATF2,BAK,EP300,OSK3B    | 30  |
| 318 | Infectious Diseases                                                            | Infection of kidney cell lines                              | 0.00136 | -5.468 | ATF2,BAK,EP300,OSK3B    | 30  |
| 319 | Cell Death and Survival                                                        | Cell death of osteoclasts                                   | 0.00136 | -0.522 | ARSA,ASAH1,GBA2,HEX     | 6   |
| 320 | Cell Death and Survival                                                        | Necrosis                                                    | 0.00136 | 2.684  | AAAS,AATK,ABCB1,AKP     | 244 |
| 321 | Cancer,Organismal Injury and Abnormalities                                     | Liquid tumor                                                | 0.00137 | 1.942  | ARCB1,ABCB1,ABCB2,AB    | 198 |
| 322 | Cellular Assembly and Organization,DNA Replication, Recombination, and F       | Segregation of chromosomes                                  | 0.00137 | -1.371 | ABRAXAS2,APC,CHMP2      | 17  |
| 323 | Cellular Assembly and Organization,Cellular Function and Maintenance           | Bone deformity                                              | 0.00138 | 1.962  | AMER1,CHPF,CSK,CTSR     | 21  |
| 324 | Cellular Assembly and Organization,Cellular Function and Maintenance           | Leukemia                                                    | 0.00138 | -0.104 | ARCB1,ACR13,ARHGAP5     | 188 |
| 325 | Cellular Assembly and Organization,Cellular Function and Maintenance           | Organization of nucleus                                     | 0.0014  | 1.226  | ARF1,ARHGAP5,CHMP2L1    | 18  |
| 326 | Cellular Assembly and Organization,Cellular Function and Maintenance           | Organization of nucleus                                     | 0.0014  | 3.205  | ARF1,ARHGAP5,CHMP2L1    | 18  |
| 327 | Cellular Assembly and Organization,Cellular Function and Maintenance           | Quiescence                                                  | 0.00141 | 1.226  | BID,DEK,DICER1,DYRK1    | 22  |
| 328 | Cellular Assembly and Organization,Cellular Function and Maintenance           | Size of brain                                               | 0.00142 | 1.226  | AATK,ARHGAP5,ARHGAP5    | 22  |
| 329 | Cellular Assembly and Organization,Cellular Function and Maintenance           | Malignant neoplasm of retroperitoneum                       | 0.00144 | -0.447 | AATK,ARHGAP5,ARHGAP5    | 22  |
| 330 | Cellular Assembly and Organization,Cellular Function and Maintenance           | Quantity of carboxywater                                    | 0.00146 | -2.178 | ARCB1,ARHGAP5,ARHGAP5   | 22  |
| 331 | Cellular Assembly and Organization,Cellular Function and Maintenance           | Infection by RNA virus                                      | 0.00148 | -7.878 | ARCB1,ACTR2,ADAL,AL     | 87  |
| 332 | Neurological Disease,Small Molecule Biochemistry                               | Paralysis                                                   | 0.00148 | 2.608  | ALDH1F1,ATL1,BICD2      | 25  |
| 333 | Cellular Assembly and Organization,Cellular Function and Maintenance           | Apoptosis of rhombencephalon                                | 0.0015  | -1.067 | ATF2,BAK,EP300,OSK3B    | 6   |
| 334 | Lipid Metabolism,Small Molecule Biochemistry                                   | Catabolism of sphingolipid                                  | 0.0015  | -2.2   | ARSA,ASAH1,GBA2,HEX     | 6   |
| 335 | Cancer,Gastrointestinal Disease,Organismal Injury and Abnormalities            | Gastric cancer                                              | 0.00151 | 1.226  | AATK,ABCB1,ABCB1,AC1    | 139 |
| 336 | Cellular Assembly and Organization                                             | Organization of organite                                    | 0.00152 | -1.664 | ARCB1,ATF2,BAK,BCL2L    | 37  |
| 337 | Cellular Assembly and Organization                                             | Organization of organite                                    | 0.00152 | -1.664 | AATK,ABCB1,ABCB1,AC1    | 139 |
| 338 | Developmental Disorder,Neurological Disease                                    | Global developmental delay with intellectual disability     | 0.00161 | 0.001  | CYFIP1,LOC102747891     | 10  |
| 339 | Hepatic System Development and Function,Hepatic System Development,Organ Morph | Abnormal morphology of hepatocytes                          | 0.00162 | 0.001  | CLN3,CTSL,ENTTF2        | 9   |
| 340 | Cell Morphology,Cellular Function and Maintenance                              | Autophagy of cervical cancer cell lines                     | 0.00162 | -0.059 | BAK,BCL2L1,CRYAB,MA     | 8   |
| 341 | Cellular Assembly and Organization,Cellular Function and Maintenance           | Autophagy of cervical cancer cell lines                     | 0.00164 | 0.001  | AATK,ARHGAP5,ARHGAP5    | 22  |
| 342 | Embryonic Development,Organismal Development                                   | Patterning of body axis                                     | 0.00164 | 0.001  | APC,BMPR1A,GRSF1,HR     | 5   |
| 343 | RNA Post-Transcriptional Modification                                          | Defecatabilization of mRNA                                  | 0.00167 | -1.964 | FTO,GRSF2,MET13,LJL     | 16  |
| 344 | Lipid Metabolism,Small Molecule Biochemistry                                   | Catabolism of glycosphingolipid                             | 0.00171 | -1.964 | ARSA,GBA2,HEXA,HEXE     | 6   |
| 345 | Cancer,Organismal Injury and Abnormalities                                     | Familial motor neuron disease                               | 0.00171 | -1.964 | ARSA,GBA2,HEXA,HEXE     | 6   |
| 346 | Hereditary Disorder,Neurological Disease,Organismal Injury and Abnormalities   | Familial motor neuron disease                               | 0.00171 | -1.964 | ARSA,GBA2,HEXA,HEXE     | 6   |
| 347 | Cellular Movement and Maintenance                                              | Cell motility of fibroblast cell lines                      | 0.00173 | -1.567 | ARHGAP5,ARHGAP5,ARHGAP5 | 22  |
| 348 | Lipid Metabolism,Small Molecule Biochemistry                                   | Concentration of phospholipid                               | 0.00173 | -0.563 | ABHD6,BAK,BID,CD51,C    | 24  |
| 349 | Cellular Assembly and Organization                                             | Formation of synapse                                        | 0.00173 | 0.001  | CYFIP1,DICER1,KAT5      | 16  |
| 350 | Cellular Assembly and Organization                                             | Formation of synapse                                        | 0.00173 | 0.001  | CYFIP1,DICER1,KAT5      | 16  |
| 351 | Cellular Assembly and Organization                                             | Formation of synapse                                        | 0.00173 | 0.001  | CYFIP1,DICER1,KAT5      | 16  |
| 352 | Cellular Assembly and Organization                                             | Formation of synapse                                        | 0.00173 | 0.001  | CYFIP1,DICER1,KAT5      | 16  |
| 353 | Cellular Assembly and Organization                                             | Formation of synapse                                        | 0.00173 | 0.001  | CYFIP1,DICER1,KAT5      | 16  |
| 354 | Cellular Assembly and Organization                                             | Formation of synapse                                        | 0.00173 | 0.001  | CYFIP1,DICER1,KAT5      | 16  |
| 355 | Cellular Assembly and Organization                                             | Formation of synapse                                        | 0.00173 | 0.001  | CYFIP1,DICER1,KAT5      | 16  |
| 356 | Cellular Assembly and Organization                                             | Formation of synapse                                        | 0.00173 | 0.001  | CYFIP1,DICER1,KAT5      | 16  |
| 357 | Cellular Assembly and Organization                                             | Formation of synapse                                        | 0.00173 | 0.001  | CYFIP1,DICER1,KAT5      | 16  |
| 358 | Cellular Assembly and Organization                                             | Formation of synapse                                        | 0.00173 | 0.001  | CYFIP1,DICER1,KAT5      | 16  |
| 359 | Cellular Assembly and Organization                                             | Formation of synapse                                        | 0.00173 | 0.001  | CYFIP1,DICER1,KAT5      | 16  |
| 360 | Cellular Assembly and Organization                                             | Formation of synapse                                        | 0.00173 | 0.001  | CYFIP1,DICER1,KAT5      | 16  |
| 361 | Cellular Assembly and Organization                                             | Formation of synapse                                        | 0.00173 | 0.001  | CYFIP1,DICER1,KAT5      | 16  |
| 362 | Cellular Assembly and Organization                                             | Formation of synapse                                        | 0.00173 | 0.001  | CYFIP1,DICER1,KAT5      | 16  |
| 363 | Cellular Assembly and Organization                                             | Formation of synapse                                        | 0.00173 | 0.001  | CYFIP1,DICER1,KAT5      | 16  |
| 364 | Cellular Assembly and Organization                                             | Formation of synapse                                        | 0.00173 | 0.001  | CYFIP1,DICER1,KAT5      | 16  |
| 365 | Cellular Assembly and Organization                                             | Formation of synapse                                        | 0.00173 | 0.001  | CYFIP1,DICER1,KAT5      | 16  |
| 366 | Cellular Assembly and Organization                                             | Formation of synapse                                        | 0.00173 | 0.001  | CYFIP1,DICER1,KAT5      | 16  |
| 367 | Cellular Assembly and Organization                                             | Formation of synapse                                        | 0.00173 | 0.001  | CYFIP1,DICER1,KAT5      | 16  |
| 368 | Cellular Assembly and Organization                                             | Formation of synapse                                        | 0.00173 | 0.001  | CYFIP1,DICER1,KAT5      | 16  |
| 369 | Cellular Assembly and Organization                                             | Formation of synapse                                        | 0.00173 | 0.001  | CYFIP1,DICER1,KAT5      | 16  |
| 370 | Cellular Assembly and Organization                                             | Formation of synapse                                        | 0.00173 | 0.001  | CYFIP1,DICER1,KAT5      | 16  |
| 371 | Cellular Assembly and Organization                                             | Formation of synapse                                        | 0.00173 | 0.001  | CYFIP1,DICER1,KAT5      | 16  |
| 372 | Cellular Assembly and Organization                                             | Formation of synapse                                        | 0.00173 | 0.001  | CYFIP1,DICER1,KAT5      | 16  |
| 373 | Cellular Assembly and Organization                                             | Formation of synapse                                        | 0.00173 | 0.001  | CYFIP1,DICER1,KAT5      | 16  |
| 374 | Cellular Assembly and Organization                                             | Formation of synapse                                        | 0.00173 | 0.001  | CYFIP1,DICER1,KAT5      | 16  |
| 375 | Cellular Assembly and Organization                                             | Formation of synapse                                        | 0.00173 | 0.001  | CYFIP1,DICER1,KAT5      | 16  |
| 376 | Cellular Assembly and Organization                                             | Formation of synapse                                        | 0.00173 | 0.001  | CYFIP1,DICER1,KAT5      | 16  |
| 377 | Cellular Assembly and Organization                                             | Formation of synapse                                        | 0.00173 | 0.001  | CYFIP1,DICER1,KAT5      | 16  |
| 378 | Cellular Assembly and Organization                                             | Formation of synapse                                        | 0.00173 | 0.001  | CYFIP1,DICER1,KAT5      | 16  |
| 379 | Cellular Assembly and Organization                                             | Formation of synapse                                        | 0.00173 | 0.001  | CYFIP1,DICER1,KAT5      | 16  |
| 380 | Cellular Assembly and Organization                                             | Formation of synapse                                        | 0.00173 | 0.001  | CYFIP1,DICER1,KAT5      | 16  |
| 381 | Cellular Assembly and Organization                                             | Formation of synapse                                        | 0.00173 | 0.001  | CYFIP1,DICER1,KAT5      | 16  |
| 382 | Cellular Assembly and Organization                                             | Formation of synapse                                        | 0.00173 | 0.001  | CYFIP1,DICER1,KAT5      | 16  |
| 383 | Cellular Assembly and Organization                                             | Formation of synapse                                        | 0.00173 | 0.001  | CYFIP1,DICER1,KAT5      | 16  |
| 384 | Cellular Assembly and Organization                                             | Formation of synapse                                        | 0.00173 | 0.001  | CYFIP1,DICER1,KAT5      | 16  |
| 385 | Cellular Assembly and Organization                                             | Formation of synapse                                        | 0.00173 | 0.001  | CYFIP1,DICER1,KAT5      | 16  |
| 386 | Cellular Assembly and Organization                                             | Formation of synapse                                        | 0.00173 | 0.001  | CYFIP1,DICER1,KAT5      | 16  |
| 387 | Cellular Assembly and Organization                                             | Formation of synapse                                        | 0.00173 | 0.001  | CYFIP1,DICER1,KAT5      | 16  |
| 388 | Cellular Assembly and Organization                                             | Formation of synapse                                        | 0.00173 | 0.001  | CYFIP1,DICER1,KAT5      | 16  |
| 389 | Cellular Assembly and Organization                                             | Formation of synapse                                        | 0.00173 | 0.001  | CYFIP1,DICER1,KAT5      | 16  |
| 390 | Cellular Assembly and Organization                                             | Formation of synapse                                        | 0.00173 | 0.001  | CYFIP1,DICER1,KAT5      | 16  |
| 391 | Cellular Assembly and Organization                                             | Formation of synapse                                        | 0.00173 | 0.001  | CYFIP1,DICER1,KAT5      | 16  |
| 392 | Cellular Assembly and Organization                                             | Formation of synapse                                        | 0.00173 | 0.001  | CYFIP1,DICER1,KAT5      | 16  |
| 393 | Cellular Assembly and Organization                                             | Formation of synapse                                        | 0.00173 | 0.001  | CYFIP1,DICER1,KAT5      | 16  |
| 394 | Cellular Assembly and Organization                                             | Formation of synapse                                        | 0.00173 | 0.001  | CYFIP1,DICER1,KAT5      | 16  |
| 395 | Cellular Assembly and Organization                                             | Formation of synapse                                        | 0.00173 | 0.001  | CYFIP1,DICER1,KAT5      | 16  |
| 396 | Cellular Assembly and Organization                                             | Formation of synapse                                        | 0.00173 | 0.001  | CYFIP1,DICER1,KAT5      | 16  |
| 397 | Cellular Assembly and Organization                                             | Formation of synapse                                        | 0.00173 | 0.001  | CYFIP1,DICER1,KAT5      | 16  |
| 398 | Cellular Assembly and Organization                                             | Formation of synapse                                        | 0.00173 | 0.001  | CYFIP1,DICER1,KAT5      | 16  |
| 399 | Cellular Assembly and Organization                                             | Formation of synapse                                        | 0.00173 | 0.001  | CYFIP1,DICER1,KAT5      | 16  |
| 400 | Cellular Assembly and Organization                                             | Formation of synapse                                        | 0.00173 | 0.001  | CYFIP1,DICER1,KAT5      | 16  |
| 401 | Cellular Assembly and Organization                                             | Formation of synapse                                        | 0.00173 | 0.001  | CYFIP1,DICER1,KAT5      | 16  |
| 402 | Cellular Assembly and Organization                                             | Formation of synapse                                        | 0.00173 | 0.001  | CYFIP1,DICER1,KAT5      | 16  |
| 403 | Cellular Assembly and Organization                                             | Formation of synapse                                        | 0.00173 | 0.001  | CYFIP1,DICER1,KAT5      | 16  |
| 404 | Cellular Assembly and Organization                                             | Formation of synapse                                        | 0.00173 | 0.001  | CYFIP1,DICER1,KAT5      | 16  |
| 405 | Cellular Assembly and Organization                                             | Formation of synapse                                        | 0.00173 | 0.001  | CYFIP1,DICER1,KAT5      | 16  |
| 406 | Cellular Assembly and Organization                                             | Formation of synapse                                        | 0.00173 | 0.001  | CYFIP1,DICER1,KAT5      | 16  |
| 407 | Cellular Assembly and Organization                                             | Formation of synapse                                        | 0.00173 | 0.001  | CYFIP1,DICER1,KAT5      | 16  |
| 408 | Cellular Assembly and Organization                                             | Formation of synapse                                        | 0.00173 | 0.001  | CYFIP1,DICER1,KAT5      | 16  |
| 409 | Cellular Assembly and Organization                                             | Formation of synapse                                        | 0.00173 | 0.001  | CYFIP1,DICER1,KAT5      | 16  |
| 410 | Cellular Assembly and Organization                                             | Formation of synapse                                        | 0.00173 | 0.001  | CYFIP1,DICER1,KAT5      | 16  |
| 411 | Cellular Assembly and Organization                                             | Formation of synapse                                        | 0.00173 | 0.001  | CYFIP1,DICER1,KAT5      | 16  |
| 412 | Cellular Assembly and Organization                                             | Formation of synapse                                        | 0.00173 | 0.001  | CYFIP1,DICER1,KAT5      | 16  |
| 413 | Cellular Assembly and Organization                                             | Formation of synapse                                        | 0.00173 | 0.001  | CYFIP1,DICER1,KAT5      | 16  |
| 414 | Cellular Assembly and Organization                                             | Formation of synapse                                        | 0.00173 | 0.001  | CYFIP1,DICER1,KAT5      | 16  |
| 415 | Cellular Assembly and Organization                                             | Formation of synapse                                        | 0.00173 | 0.001  | CYFIP1,DICER1,KAT5      | 16  |
| 416 | Cellular Assembly and Organization                                             | Formation of synapse                                        | 0.00173 | 0.001  | CYFIP1,DICER1,KAT5      | 16  |
| 417 | Cellular Assembly and Organization                                             | Formation of synapse                                        | 0.00173 | 0.001  | CYFIP1,DICER1,KAT5      | 16  |
| 418 | Cellular Assembly and Organization                                             | Formation of synapse                                        | 0.00173 | 0.001  | CYFIP1,DICER1,KAT5      | 16  |
| 419 | Cellular Assembly and Organization                                             | Formation of synapse                                        | 0.00173 | 0.001  | CYFIP1,DICER1,KAT5      | 16  |
| 420 | Cellular Assembly and Organization                                             | Formation of synapse                                        | 0.00173 | 0.001  | CYFIP1,DICER1,KAT5      | 16  |
| 421 | Cellular Assembly and Organization                                             | Formation of synapse                                        | 0.00173 | 0.001  | CYFIP1,DICER1,KAT5      | 16  |
| 422 | Cellular Assembly and Organization                                             | Formation of synapse                                        | 0.00173 | 0.001  | CYFIP1,DICER1,KAT5      | 16  |
| 423 | Cellular Assembly and Organization                                             | Formation of synapse                                        | 0.00173 | 0.001  | CYFIP1,DICER1,KAT5      | 16  |
| 424 | Cellular Assembly and Organization                                             | Formation of synapse                                        | 0.00173 | 0.001  | CYFIP1,DICER1,KAT5      | 16  |
| 425 | Cellular Assembly and Organization                                             | Formation of synapse                                        | 0.00173 | 0.001  | CYFIP1,DICER1,KAT5      | 16  |
| 426 | Cellular Assembly and Organization                                             | Formation of synapse                                        | 0.00173 | 0.001  | CYFIP1,DICER1,KAT5      | 16  |
| 427 | Cellular Assembly and Organization                                             | Formation of synapse                                        | 0.00173 | 0.001  | CYFIP1,DICER1,KAT5      | 16  |
| 428 | Cellular Assembly and Organization                                             | Formation of synapse                                        | 0.00173 | 0.001  | CYFIP1,DICER1,KAT5      | 16  |
| 429 | Cellular Assembly and Organization                                             | Formation of synapse                                        | 0.00173 | 0.001  | CYFIP1,DICER1,KAT5      | 16  |
| 430 | Cellular Assembly and Organization                                             | Formation of synapse                                        | 0.00173 | 0.001  | CYFIP1,DICER1,KAT5      | 16  |
| 431 | Cellular Assembly and Organization                                             | Formation of synapse                                        | 0.00173 | 0.001  | CYFIP1,DICER1,KAT5      | 16  |
| 432 | Cellular Assembly and Organization                                             | Formation of synapse                                        | 0.00173 | 0.001  | CYFIP1,DICER1,KAT5      | 16  |
| 433 | Cellular Assembly and Organization                                             | Formation of synapse                                        | 0.00173 | 0.001  | CYFIP1,DICER1,KAT5      | 16  |
| 434 | Cellular Assembly and Organization                                             | Formation of synapse                                        | 0.00173 | 0.001  | CYFIP1,DICER1,KAT5      | 16  |
| 435 | Cellular Assembly and Organization                                             | Formation of synapse                                        | 0.00173 | 0.001  | CYFIP1,DICER1,KAT5      | 16  |
| 436 | Cellular Assembly and Organization                                             | Formation of synapse                                        | 0.00173 | 0.001  | CYFIP1,DICER1,KAT5      | 16  |
| 437 | Cellular Assembly and Organization                                             | Formation of synapse                                        | 0.00173 | 0.001  | CYFIP1,DICER1,KAT5      | 16  |
| 438 | Cellular Assembly and Organization                                             | Formation of synapse                                        | 0.00173 | 0.001  | CYFIP1,DICER1,KAT5      | 16  |
| 439 | Cellular Assembly and Organization                                             | Formation of synapse                                        | 0.00173 | 0.001  | CYFIP1,DICER1,KAT5      | 16  |
| 440 | Cellular Assembly and Organization                                             | Formation of synapse                                        | 0.00173 | 0.001  |                         |     |

**Table S5 (Related to STAR Method) Primer sequences**

| Primer Name         | Gene Targeted    | Application | Sequence (5'-3')                  |
|---------------------|------------------|-------------|-----------------------------------|
| hBRACHYURY-F        | <i>BRACHYURY</i> | qRT-PCR     | 5'-GCTGTGACAGGTACCCAACC-3'        |
| hBRACHYURY-R        | <i>BRACHYURY</i> | qRT-PCR     | 5'-CATGCAGGTGAGTTGTCAGAA-3'       |
| hBRCA1-Full-F       | <i>BRCA1</i>     | qRT-PCR     | 5'-TAGCAAGGAGCCAACATAACAGAT-3'    |
| hBRCA1-Full-R       | <i>BRCA1</i>     | qRT-PCR     | 5'-CTGTGTGAGAGAAAAGAATGGAATAAG-3' |
| hBRCA1-DeltaEXON1-F | <i>BRCA1</i>     | qRT-PCR     | 5'-GATTCTGCAAAAAGGCTGCT-3'        |
| hBRCA1-DeltaEXON1-R | <i>BRCA1</i>     | qRT-PCR     | 5'-CAGATGCTGCTTCACCCTGA-3'        |
| hGAPDH-F            | <i>GAPDH</i>     | qRT-PCR     | 5'-GTGGACCTGACCTGCCGTCT-3'        |
| hGAPDH-R            | <i>GAPDH</i>     | qRT-PCR     | 5'-GGAGGAGTGGGTGTCGCTGT-3'        |
| hGATA3-F            | <i>GATA3</i>     | qRT-PCR     | 5'-CTCATTAAGCCCAAGCGAAG-3'        |
| hGATA3-R            | <i>GATA3</i>     | qRT-PCR     | 5'-GTCTGACAGTTCGCACAGGA-3'        |
| hMIXL1-F            | <i>MIXL1</i>     | qRT-PCR     | 5'-GGTACCCCGACATCCACTT-3'         |
| hMIXL1-R            | <i>MIXL1</i>     | qRT-PCR     | 5'-GCCTGTTCTGGAACCATACCT-3'       |
| hOCT4-F             | <i>POU5F1</i>    | qRT-PCR     | 5'-ACCCACACTGCAGCAGATCA-3'        |
| hOCT4-R             | <i>POU5F1</i>    | qRT-PCR     | 5'-CCACACTCGGACCACATCC-3'         |
| hOSR1-F             | <i>OSR1</i>      | qRT-PCR     | 5'-GGACCTCTGCGGAACAAG-3'          |
| hOSR1-R             | <i>OSR1</i>      | qRT-PCR     | 5'-TGCAGGGAAGGGTGGATA-3'          |
| hOVGP1-F            | <i>OVGP1</i>     | qRT-PCR     | 5'-AATTCTCTACCCAGAGTTCAACAAA-3'   |
| hOVGP1-R            | <i>OVGP1</i>     | qRT-PCR     | 5'-CCGATGGACAGTAGTGTTTTCA-3'      |
| hPAX2-F             | <i>PAX2</i>      | qRT-PCR     | 5'-GAAGTGCCCCCTTGTGTG-3'          |

|          |              |         |                             |
|----------|--------------|---------|-----------------------------|
| hPAX2-R  | <i>PAX2</i>  | qRT-PCR | 5'-TCGTTGTAGGCCGTGTACTG-3'  |
| hSALL1-F | <i>SALL1</i> | qRT-PCR | 5'-ATTGCAGCCTAGCCAAAAAG-3'  |
| hSALL1-R | <i>SALL1</i> | qRT-PCR | 5'-ACCAGCTGAGCAGAAAGGTC-3'  |
| hSOX17-F | <i>SOX17</i> | qRT-PCR | 5'-ACGCCGAGTTGAGCAAGA-3'    |
| hSOX17-R | <i>SOX17</i> | qRT-PCR | 5'-TCTGCCTCCTCCACGAAG-3'    |
| hSOX2-F  | <i>SOX2</i>  | qRT-PCR | 5'-GGGGGAATGGACCTTGTATAG-3' |
| hSOX2-R  | <i>SOX2</i>  | qRT-PCR | 5'-GCAAAGCTCCTACCGTACCA-3'  |
| hWT1-F   | <i>WT1</i>   | qRT-PCR | 5'-GAATGCATGACCTGGAATCA-3'  |
| hWT1-R   | <i>WT1</i>   | qRT-PCR | 5'-TCTGCCCTTCTGTCCATTTC-3'  |
